# Supplementary material for: Identifying personalized metabolic signatures in breast cancer
Source: Preprints.org preprint supplement (doi:10.20944/preprints202011.0474.v1), 2020-11-18

# Divergence Analysis

## Contents

|          |                                                     |           |
|----------|-----------------------------------------------------|-----------|
| <b>1</b> | <b>Introduction</b>                                 | <b>1</b>  |
| <b>2</b> | <b>PCA with metabolic reaction data</b>             | <b>1</b>  |
| <b>3</b> | <b>PCA with divergence data</b>                     | <b>1</b>  |
| <b>4</b> | <b>Examining clusters with important phenotypes</b> | <b>4</b>  |
| 4.1      | PAM50 . . . . .                                     | 4         |
| 4.2      | ER Status . . . . .                                 | 7         |
| 4.3      | Triple Negative Status . . . . .                    | 8         |
| 4.4      | AJCC Stage . . . . .                                | 9         |
| 4.5      | Percent lymphocyte infiltration . . . . .           | 10        |
| 4.6      | Percent monocyte infiltration . . . . .             | 10        |
| 4.7      | Percent necrosis . . . . .                          | 10        |
| 4.8      | Percent neutrophil infiltration . . . . .           | 11        |
| 4.9      | Percent normal cells . . . . .                      | 11        |
| 4.10     | Percent stromal cells . . . . .                     | 11        |
| 4.11     | Percent tumor cells . . . . .                       | 12        |
| 4.12     | Tissue source site . . . . .                        | 12        |
| 4.13     | Year of initial pathologic diagnosis . . . . .      | 13        |
| 4.14     | Pathologic state . . . . .                          | 14        |
| <b>5</b> | <b>Reaction value analysis</b>                      | <b>15</b> |
| <b>6</b> | <b>Analysis of divergence data</b>                  | <b>19</b> |
| <b>7</b> | <b>Molecular Checks</b>                             | <b>22</b> |

## 1 Introduction

## 2 PCA with metabolic reaction data

On each plot we color the samples according to the 4 clusters that have been identified through k-means.

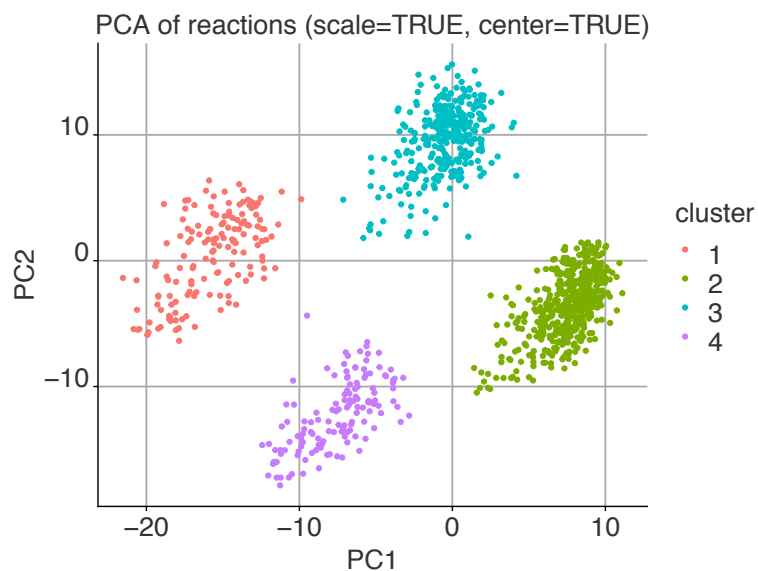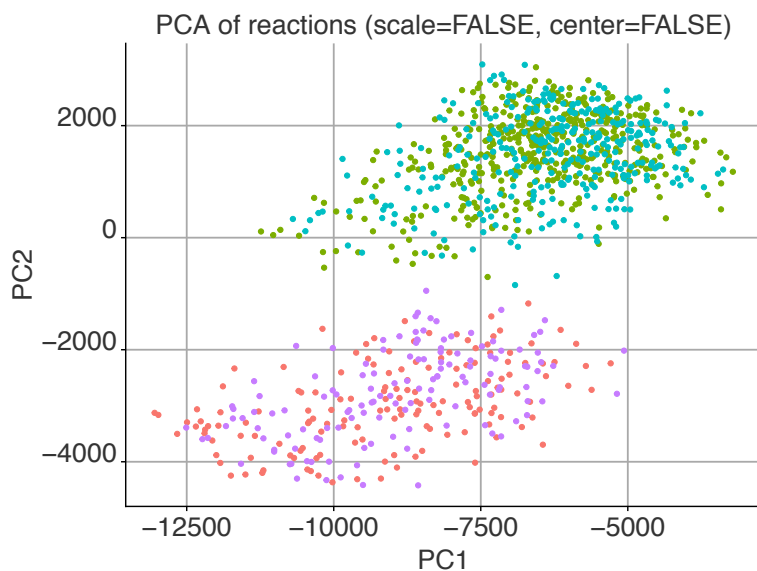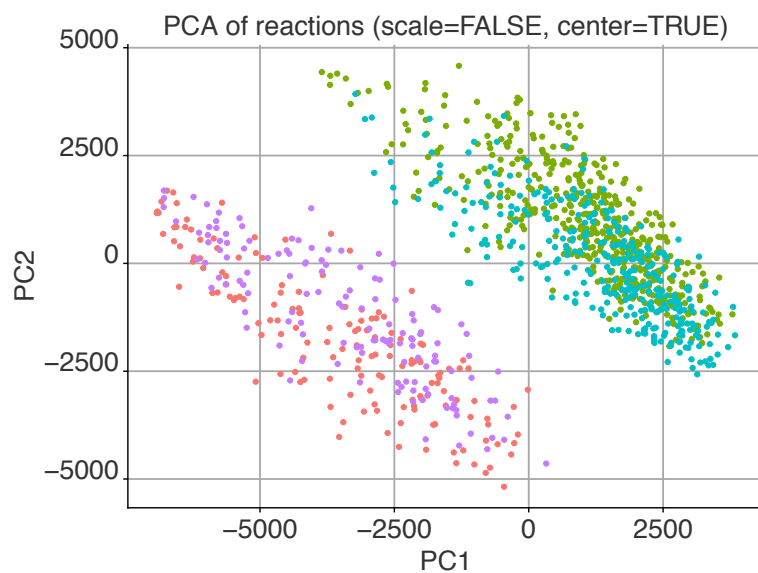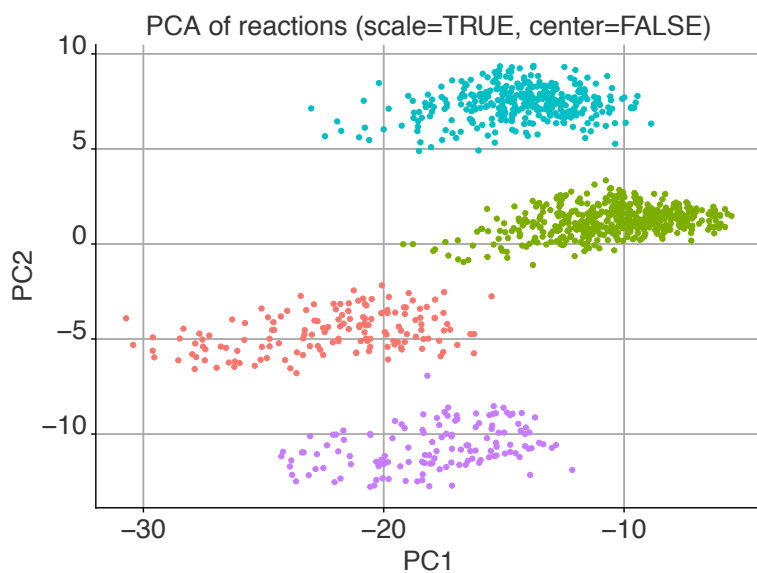

### 3 PCA with divergence data

We cluster the divergence data and color the plots with the same cluster scheme as above.

PCA of divergence (scale=FALSE, center=FALSE)

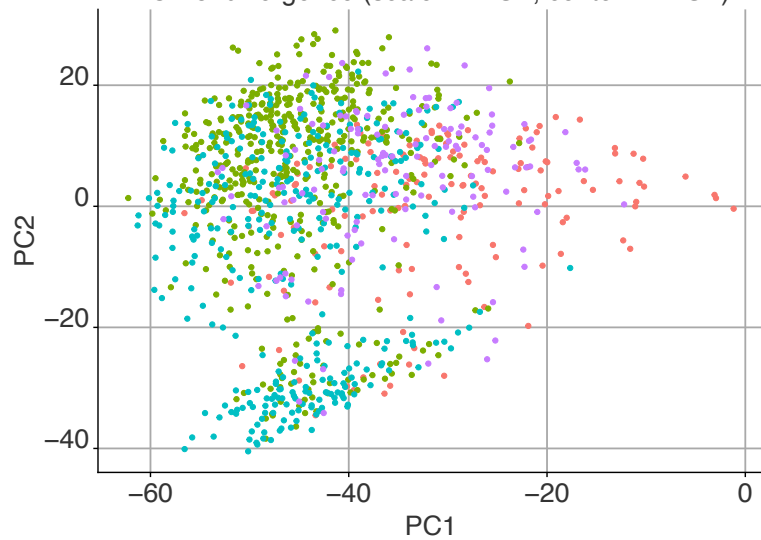

PCA of divergence (scale=TRUE, center=FALSE)

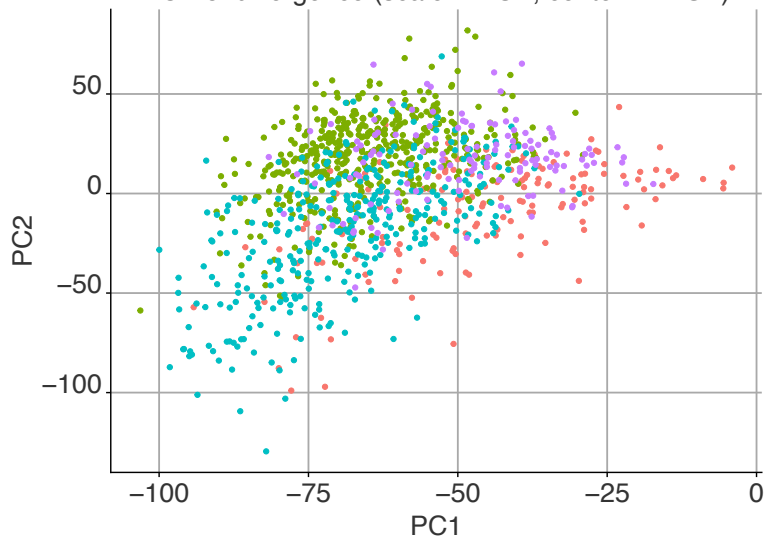

PCA of divergence (scale=FALSE, center=TRUE)

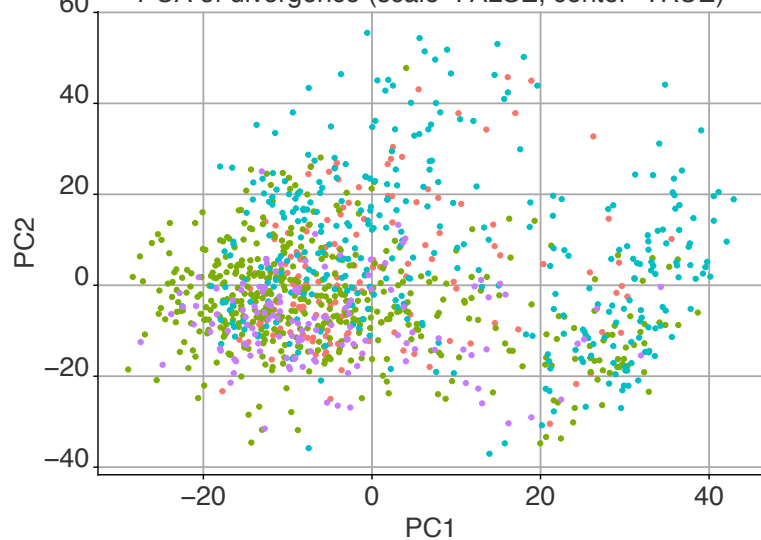

PCA of divergence (scale=TRUE, center=TRUE)

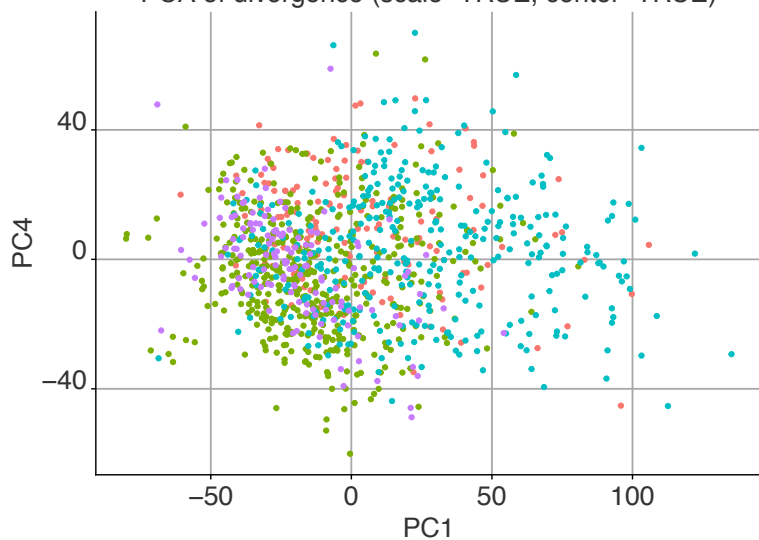





## 4 Examining clusters with important phenotypes

### 4.1 PAM50

PCA of reactions (scale=TRUE, center=TRUE)

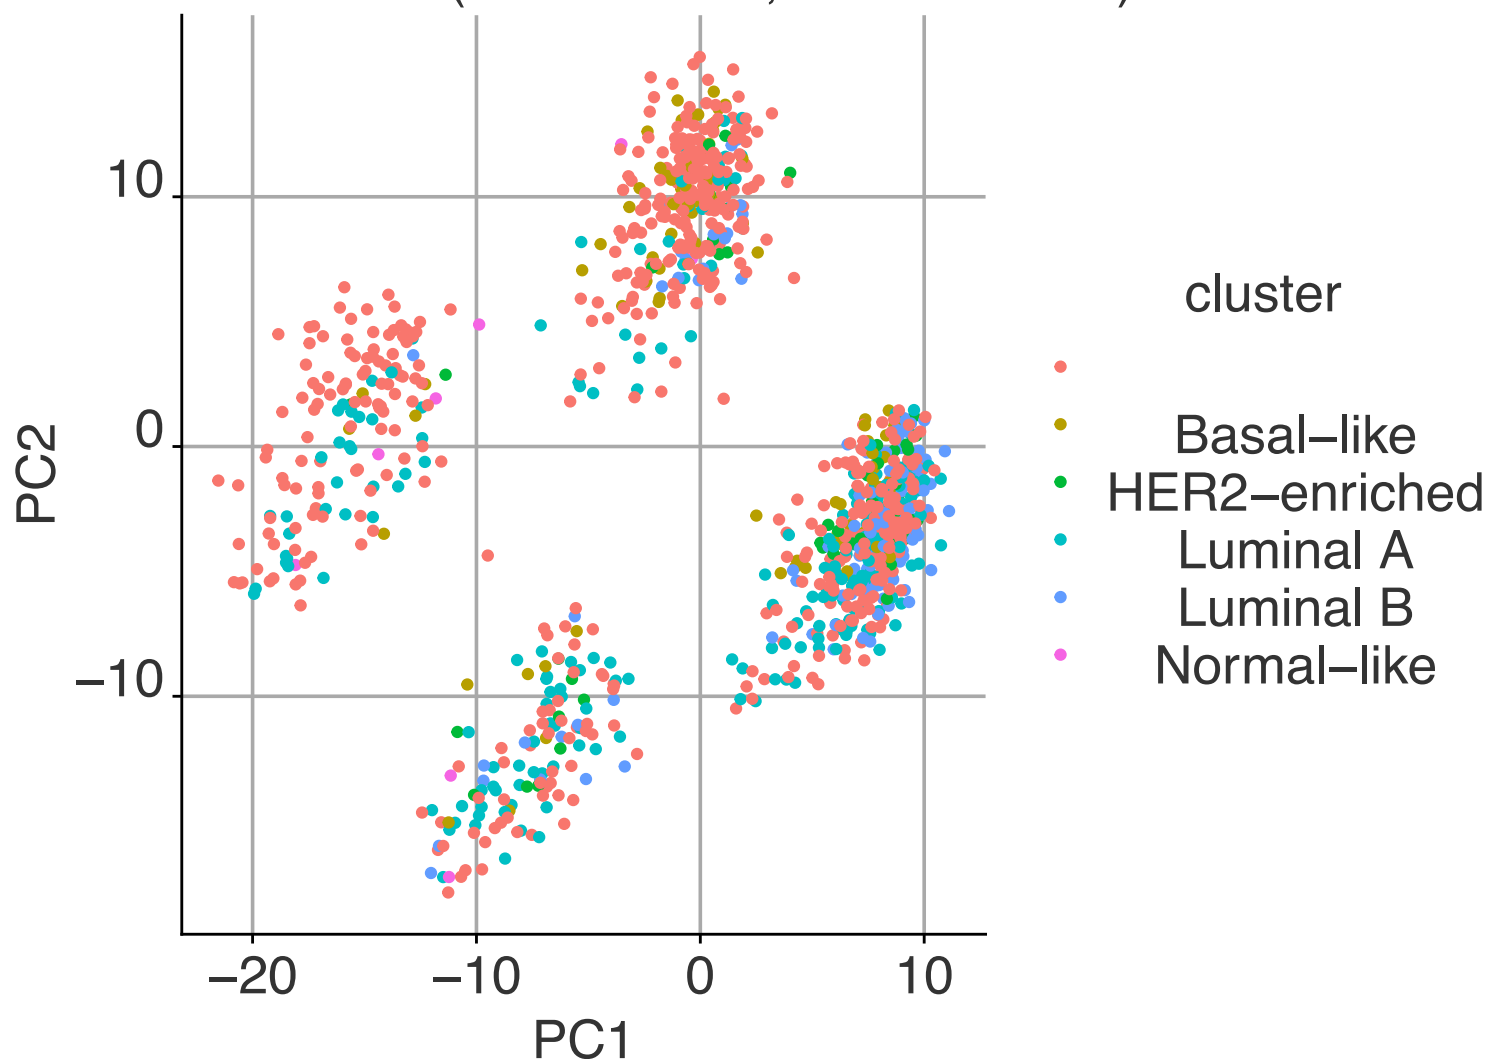

PCA of reactions (only samples with known PAM50)

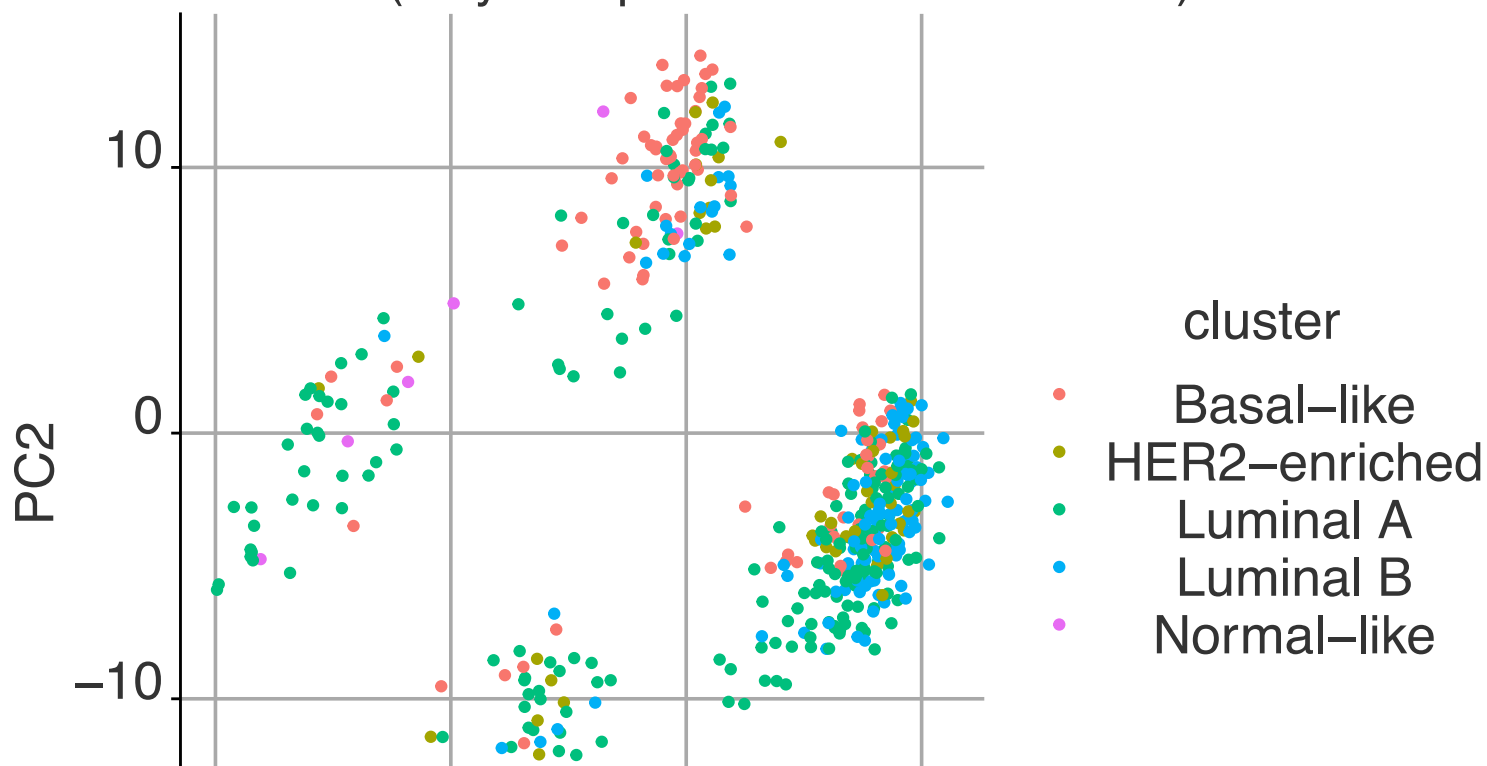

Table 1: Clusters by PAM50 (Chi-sq P=0.0000)

|               | 1   | 2   | 3   | 4  |
|---------------|-----|-----|-----|----|
|               | 109 | 185 | 227 | 58 |
| Basal-like    | 5   | 33  | 52  | 7  |
| HER2-enriched | 2   | 36  | 11  | 9  |
| Luminal A     | 32  | 122 | 31  | 46 |
| Luminal B     | 1   | 98  | 16  | 12 |
| Normal-like   | 4   | 0   | 2   | 2  |

Table 2: Clusters by PAM50 as proportions for each subtype

|               | 1    | 2    | 3    | 4    |
|---------------|------|------|------|------|
|               | 0.19 | 0.32 | 0.39 | 0.10 |
| Basal-like    | 0.05 | 0.34 | 0.54 | 0.07 |
| HER2-enriched | 0.03 | 0.62 | 0.19 | 0.16 |
| Luminal A     | 0.14 | 0.53 | 0.13 | 0.20 |
| Luminal B     | 0.01 | 0.77 | 0.13 | 0.09 |
| Normal-like   | 0.50 | 0.00 | 0.25 | 0.25 |



PCA of reactions (scale=TRUE, center=TRUE)

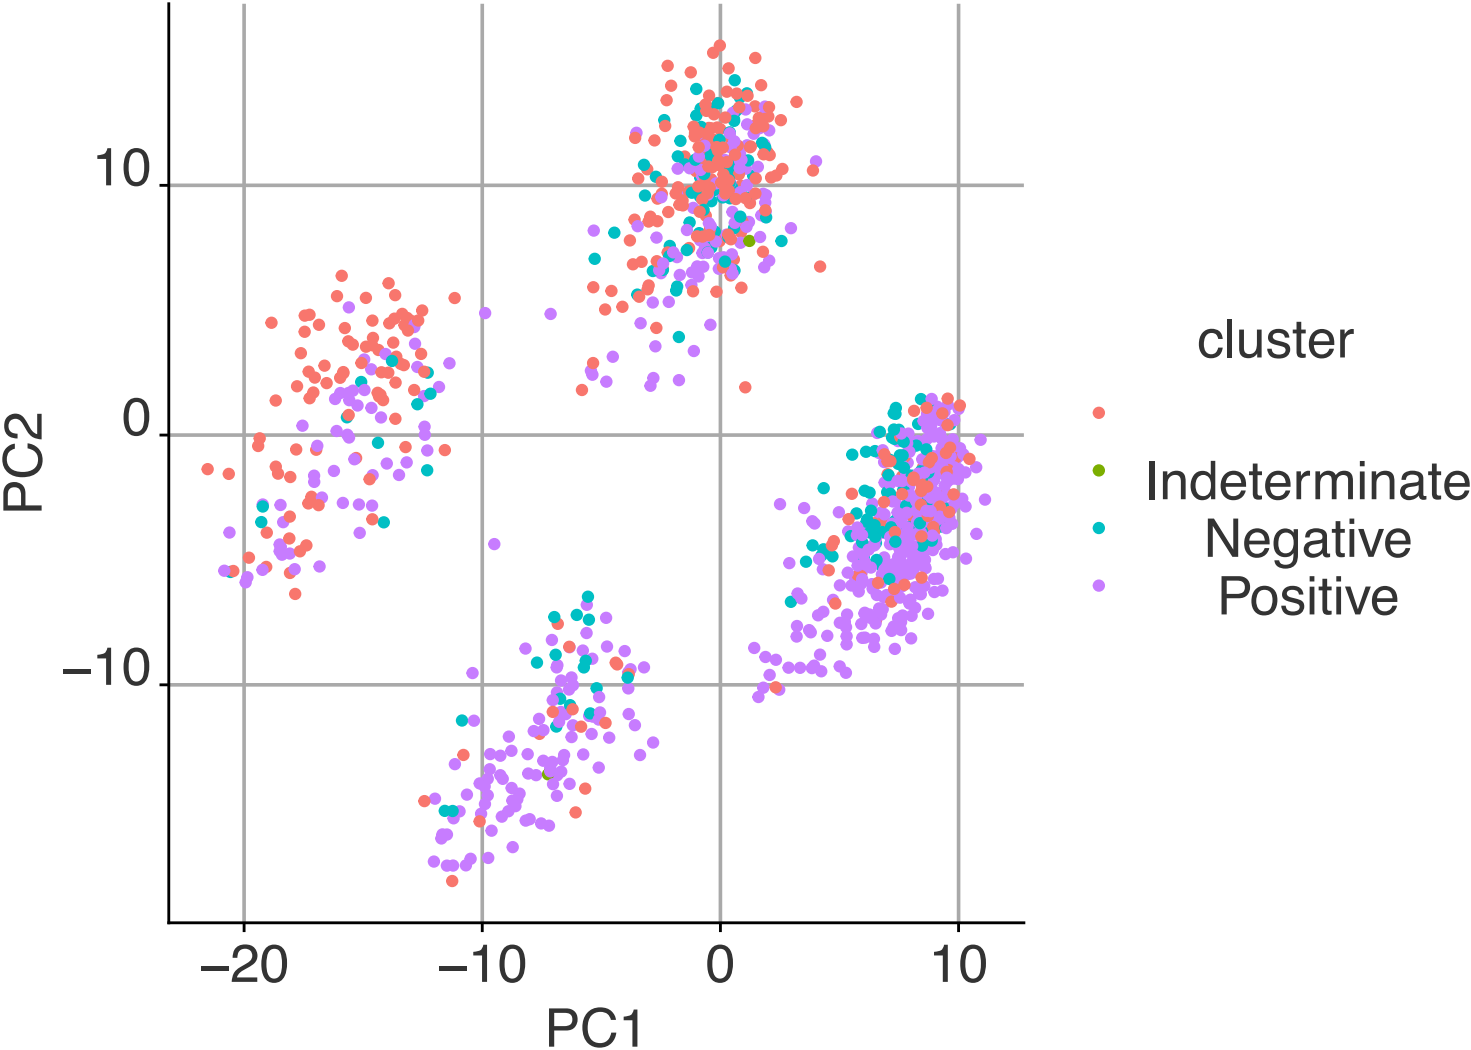

PCA of reactions (only samples with known ER)

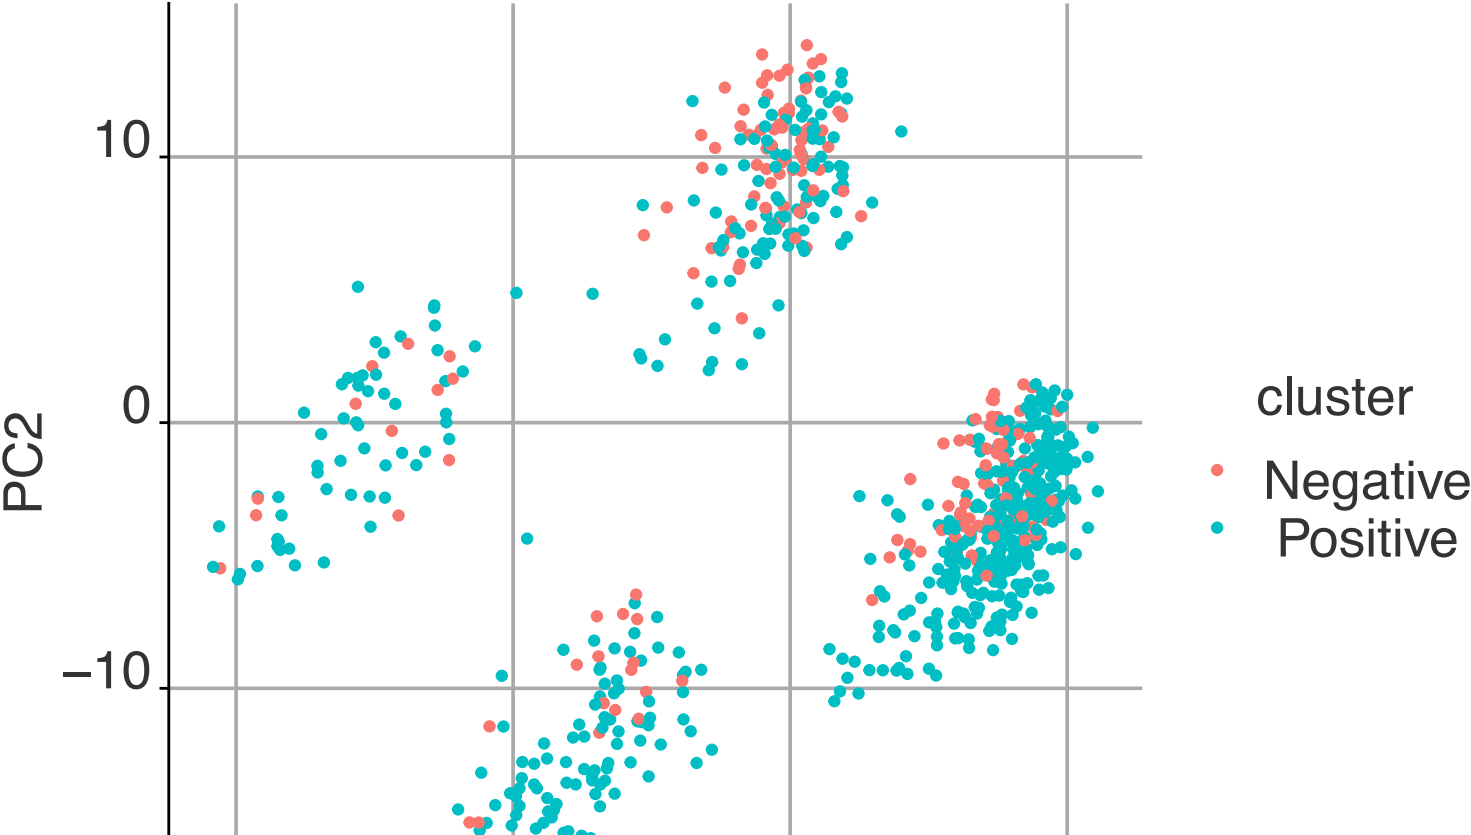

Table 3: Clusters by ER (Chi-sq P=0.0000)

|               | 1  | 2   | 3   | 4   |
|---------------|----|-----|-----|-----|
|               | 84 | 62  | 160 | 16  |
| Indeterminate | 0  | 0   | 1   | 1   |
| Negative      | 12 | 76  | 73  | 17  |
| Positive      | 57 | 336 | 105 | 100 |

Table 4: Clusters by ER as proportions for each subtype

|               | 1    | 2    | 3    | 4    |
|---------------|------|------|------|------|
|               | 0.26 | 0.19 | 0.50 | 0.05 |
| Indeterminate | 0.00 | 0.00 | 0.50 | 0.50 |
| Negative      | 0.07 | 0.43 | 0.41 | 0.10 |
| Positive      | 0.10 | 0.56 | 0.18 | 0.17 |

4.3 Triple Negative Status

PCA of reactions (only samples with known triple neg status)

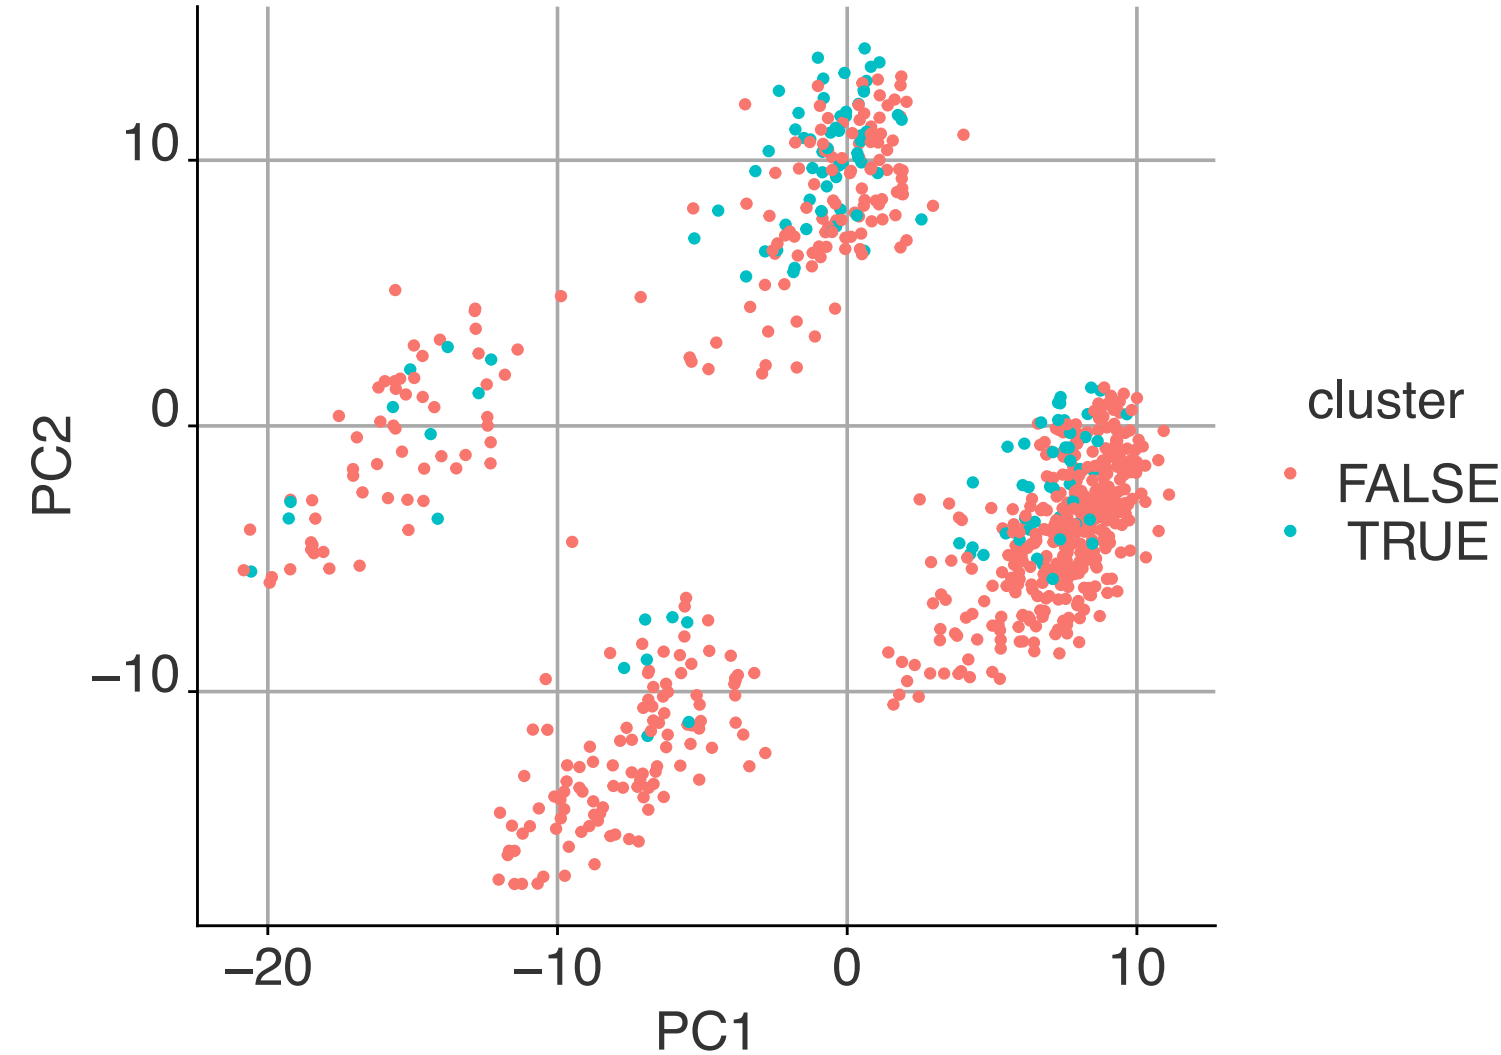

Table 5: Clusters by triple neg (Chi-sq P=0.0000)

|       | 1  | 2   | 3   | 4   |
|-------|----|-----|-----|-----|
| FALSE | 58 | 362 | 115 | 110 |
| TRUE  | 10 | 47  | 58  | 7   |

Table 6: Clusters by triple neg as proportions

|       | 1    | 2    | 3    | 4    |
|-------|------|------|------|------|
| FALSE | 0.09 | 0.56 | 0.18 | 0.17 |
| TRUE  | 0.08 | 0.39 | 0.48 | 0.06 |

4.4 AJCC Stage

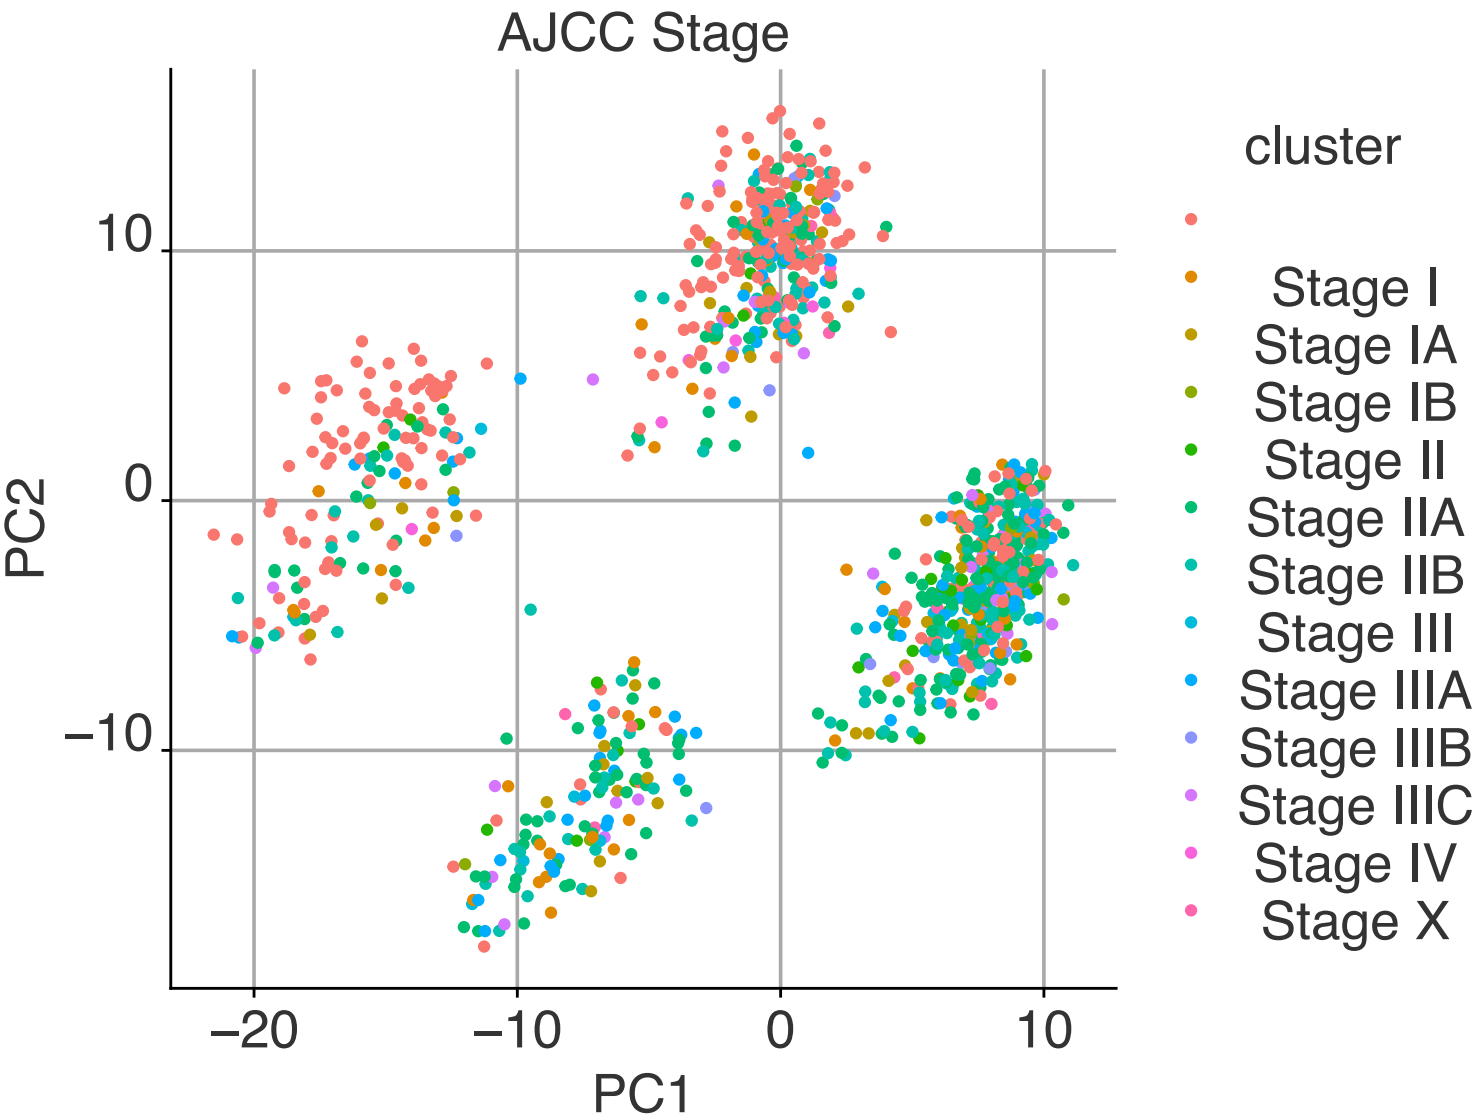

4.5 Percent lymphocyte infiltration

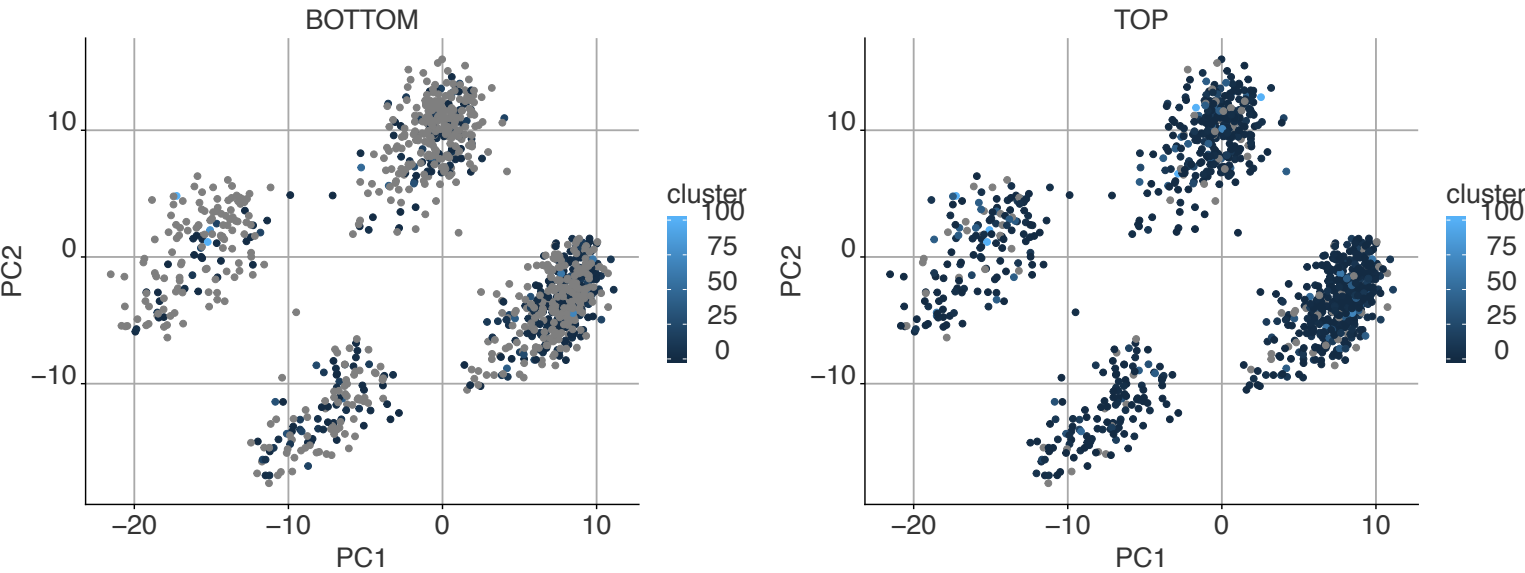

4.6 Percent monocyte infiltration

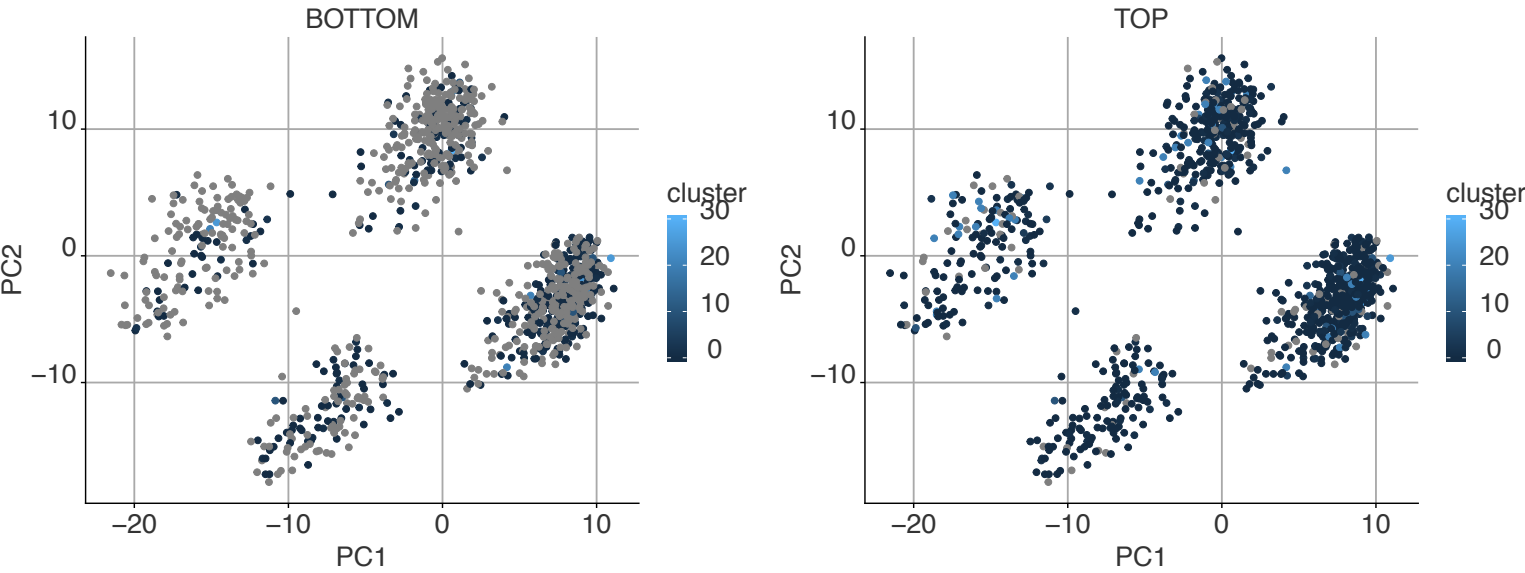

4.7 Percent necrosis

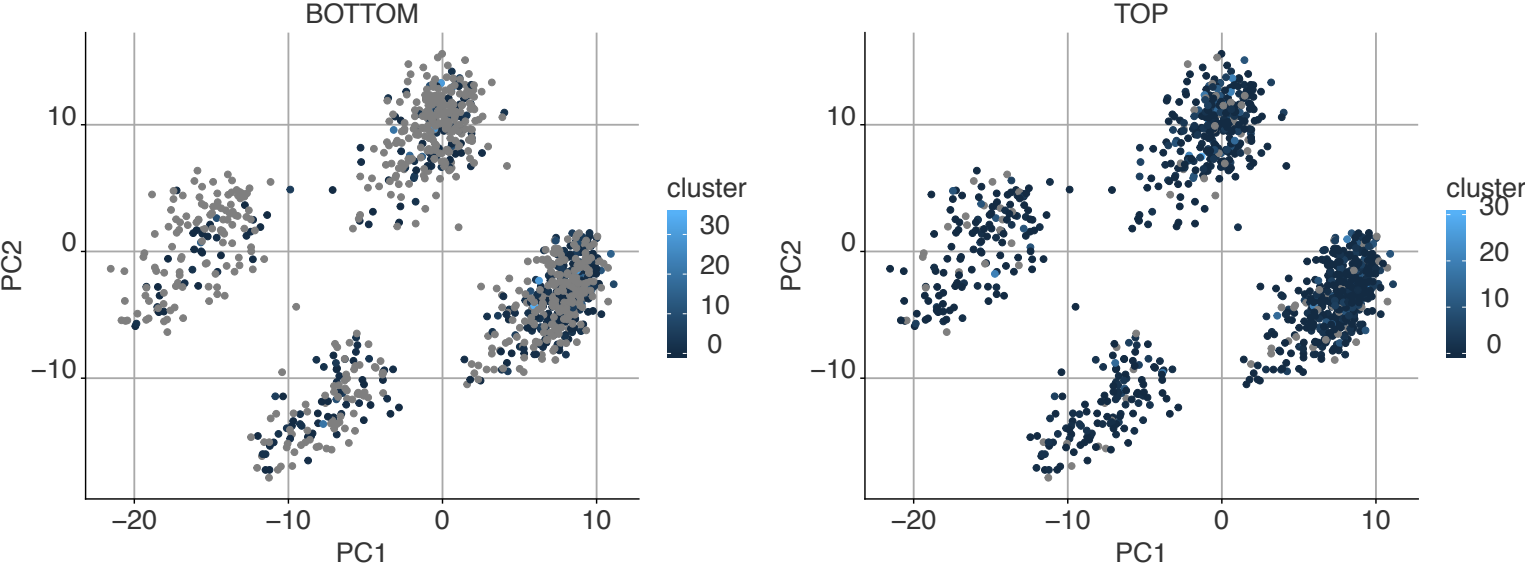

4.8 Percent neutrophil infiltration

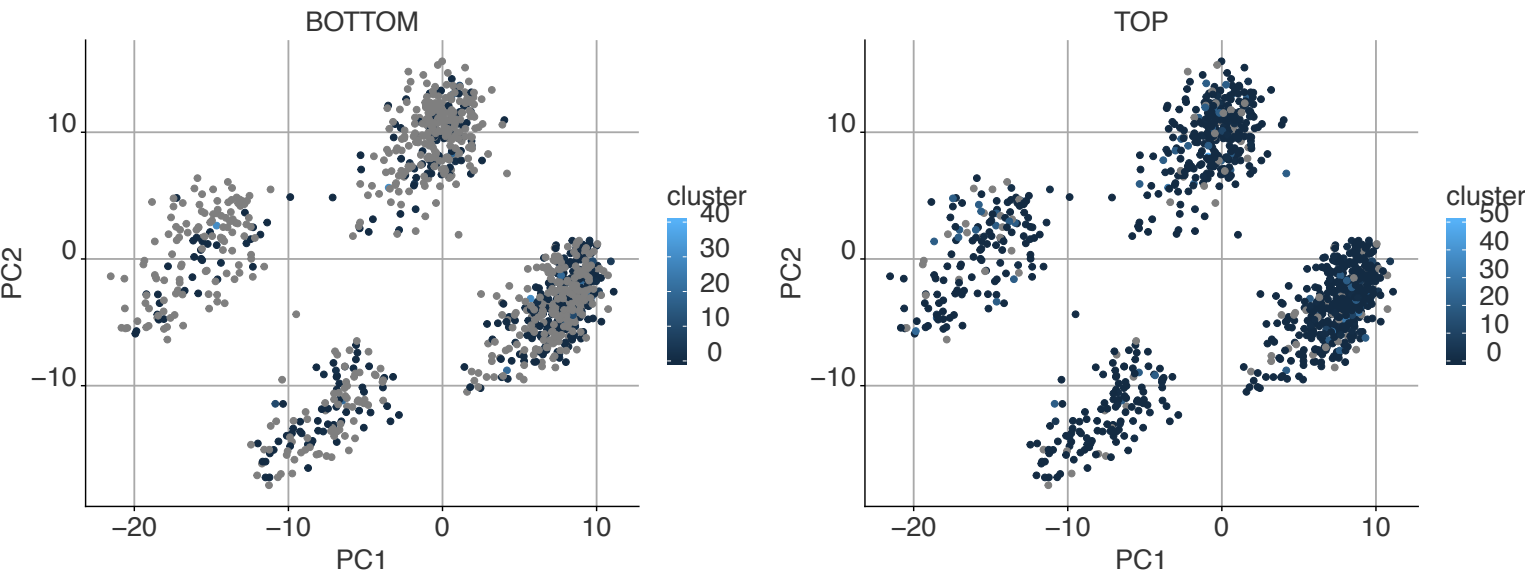

4.9 Percent normal cells

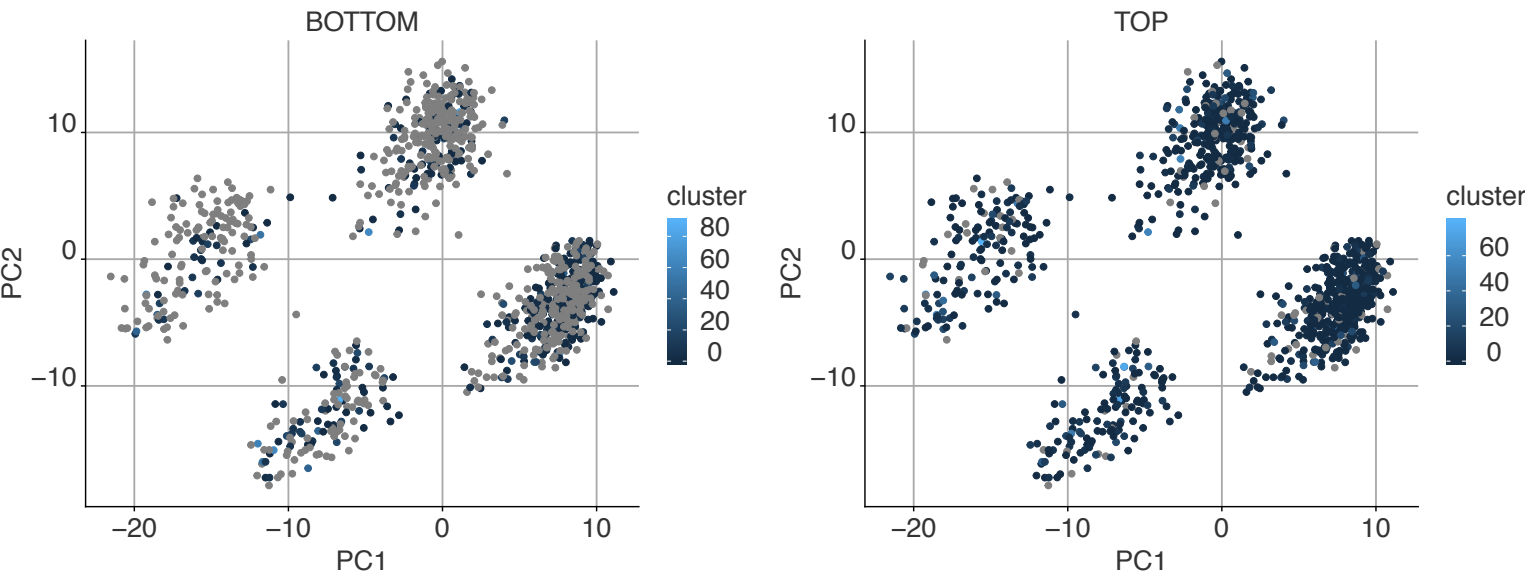

4.10 Percent stromal cells

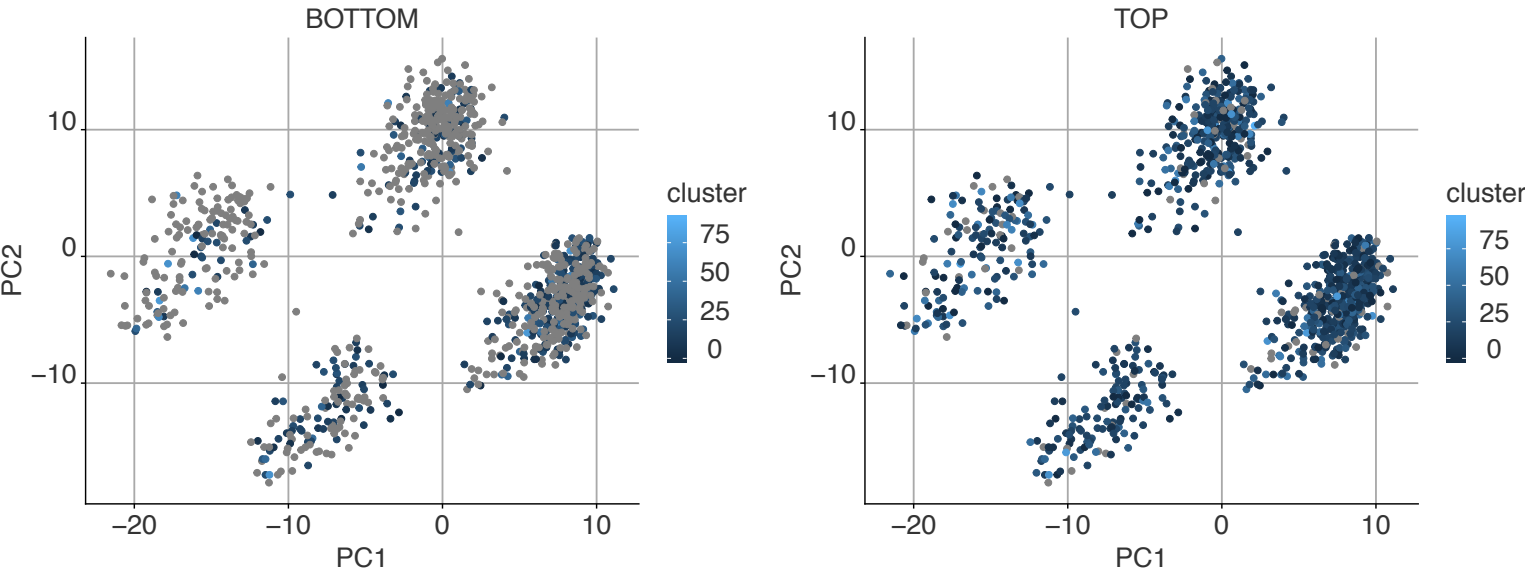



4.11 Percent tumor cells

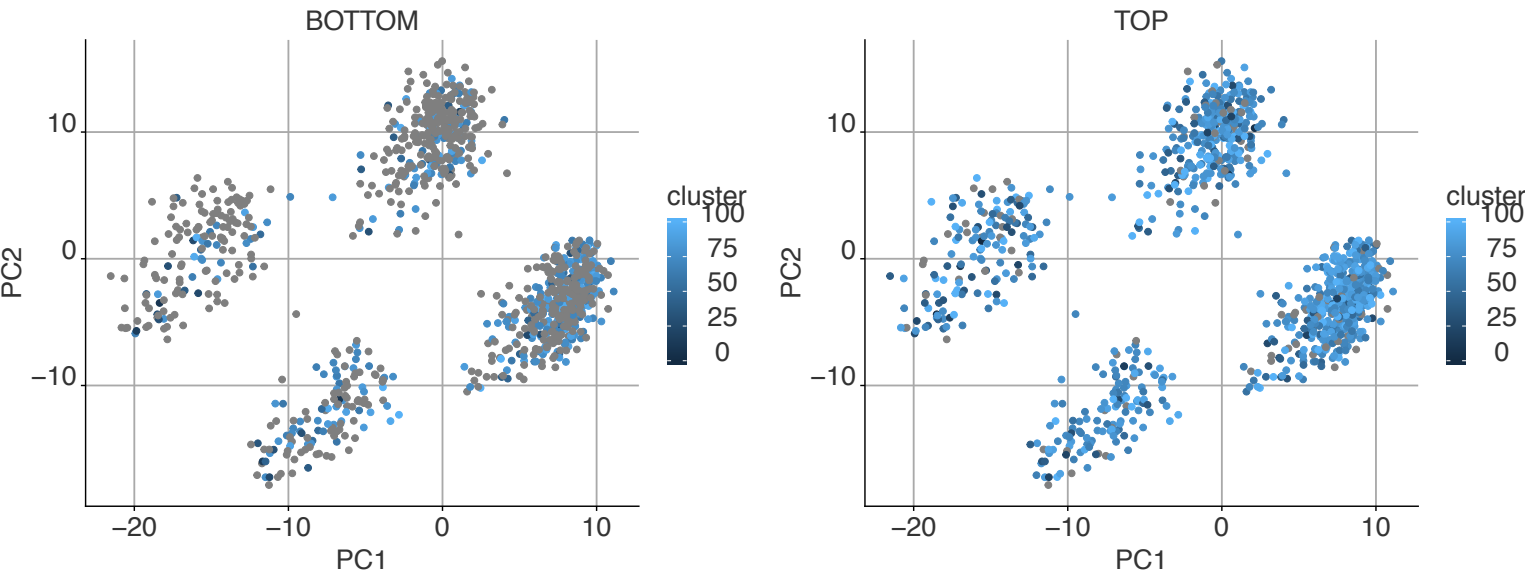

4.12 Tissue source site

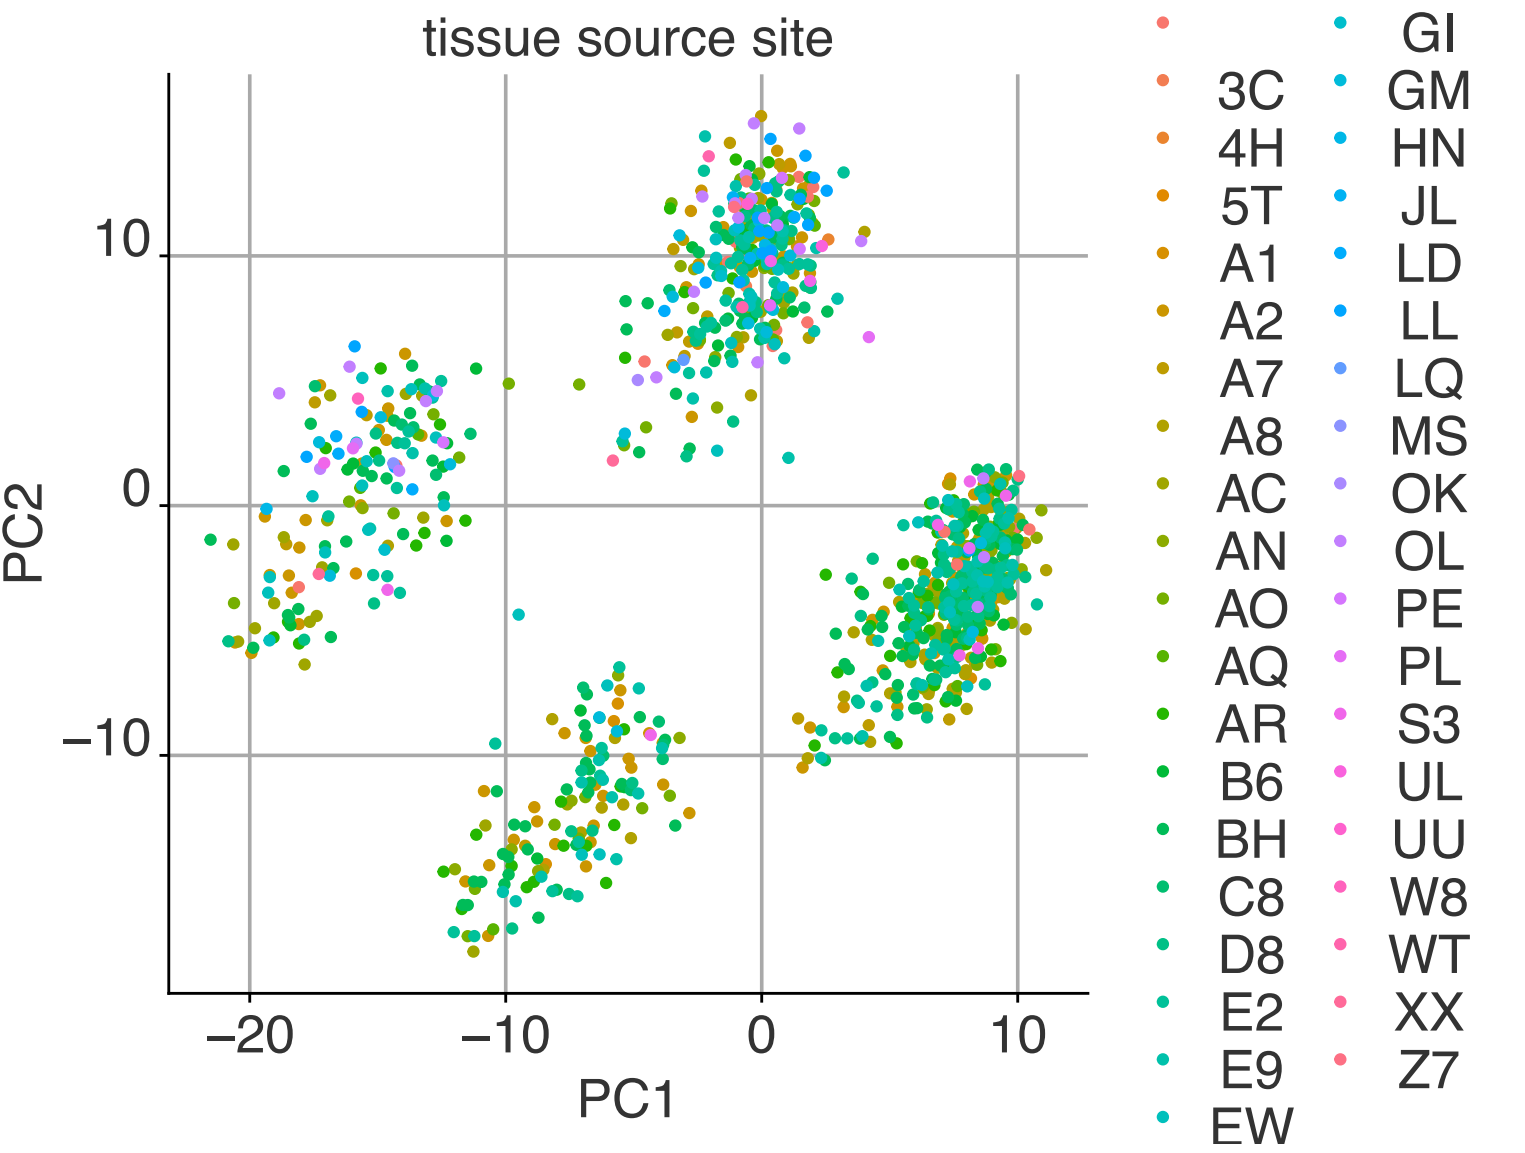

tissue source site

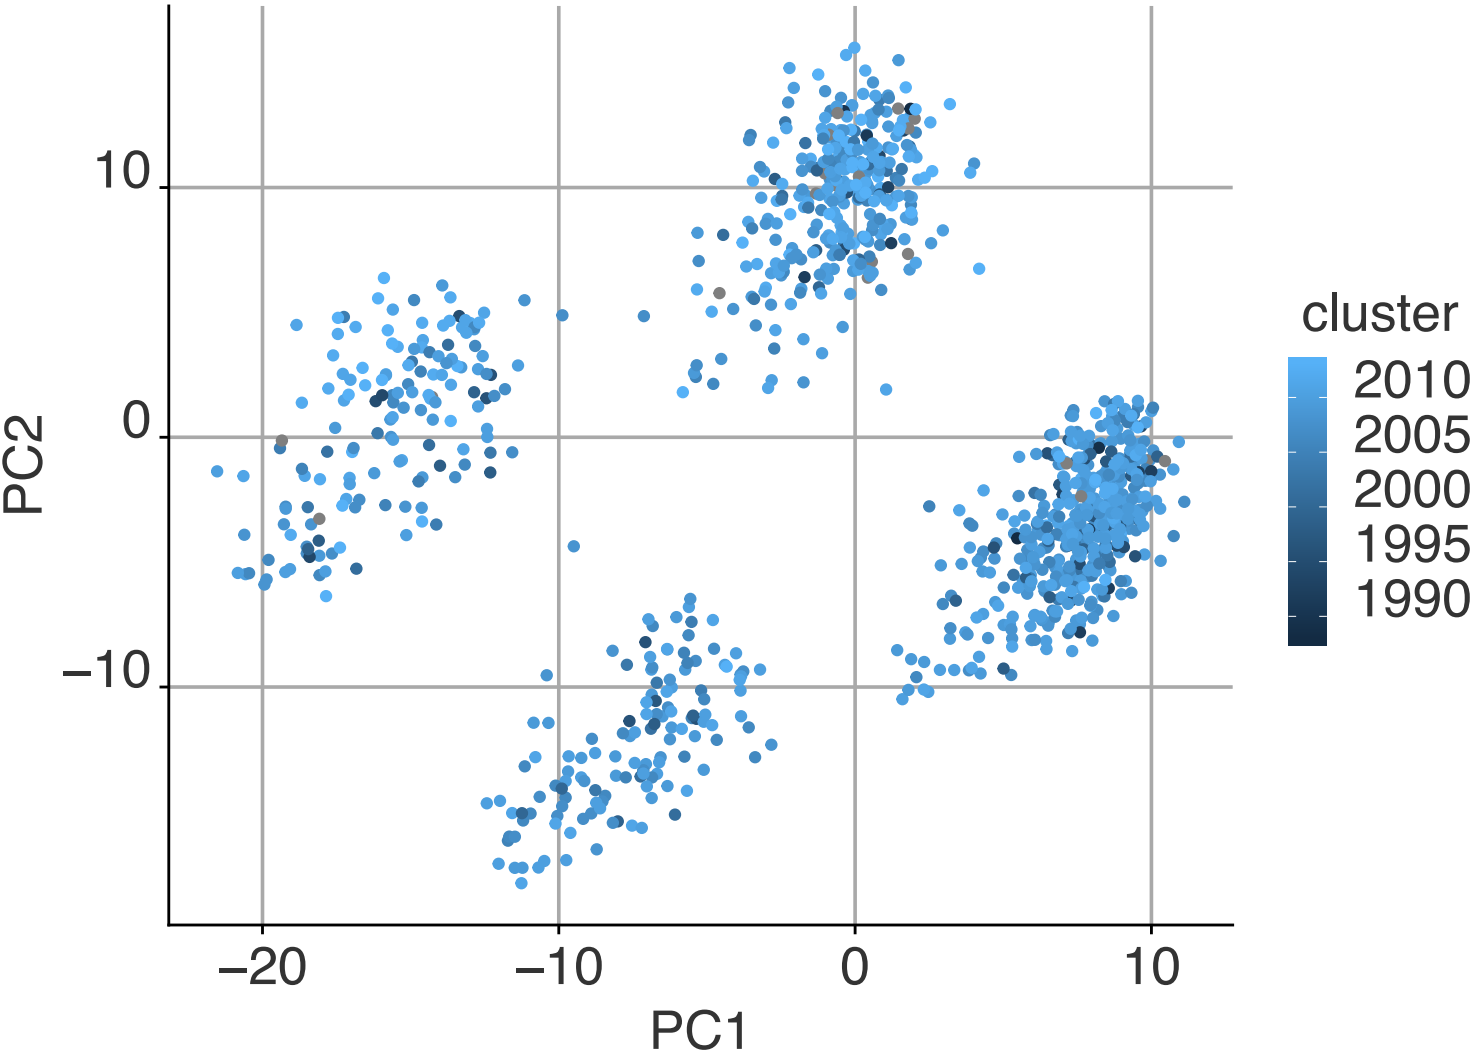

4.14 Pathologic state

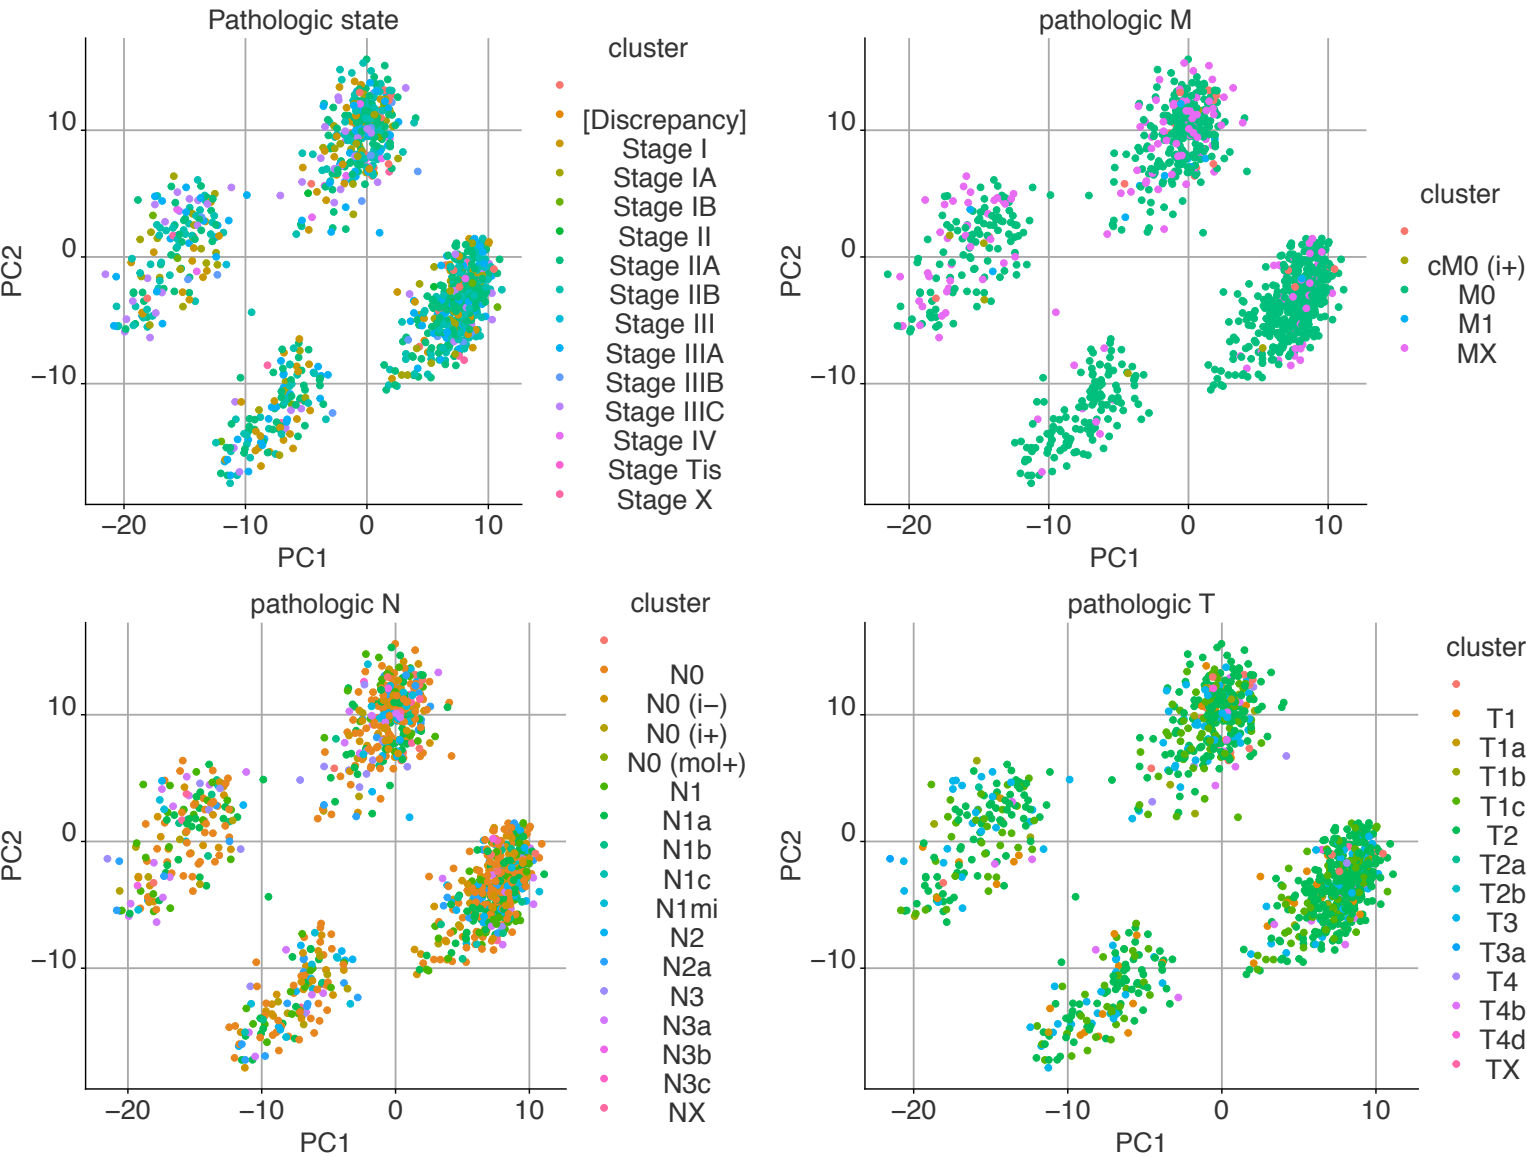

5    Reaction value analysis

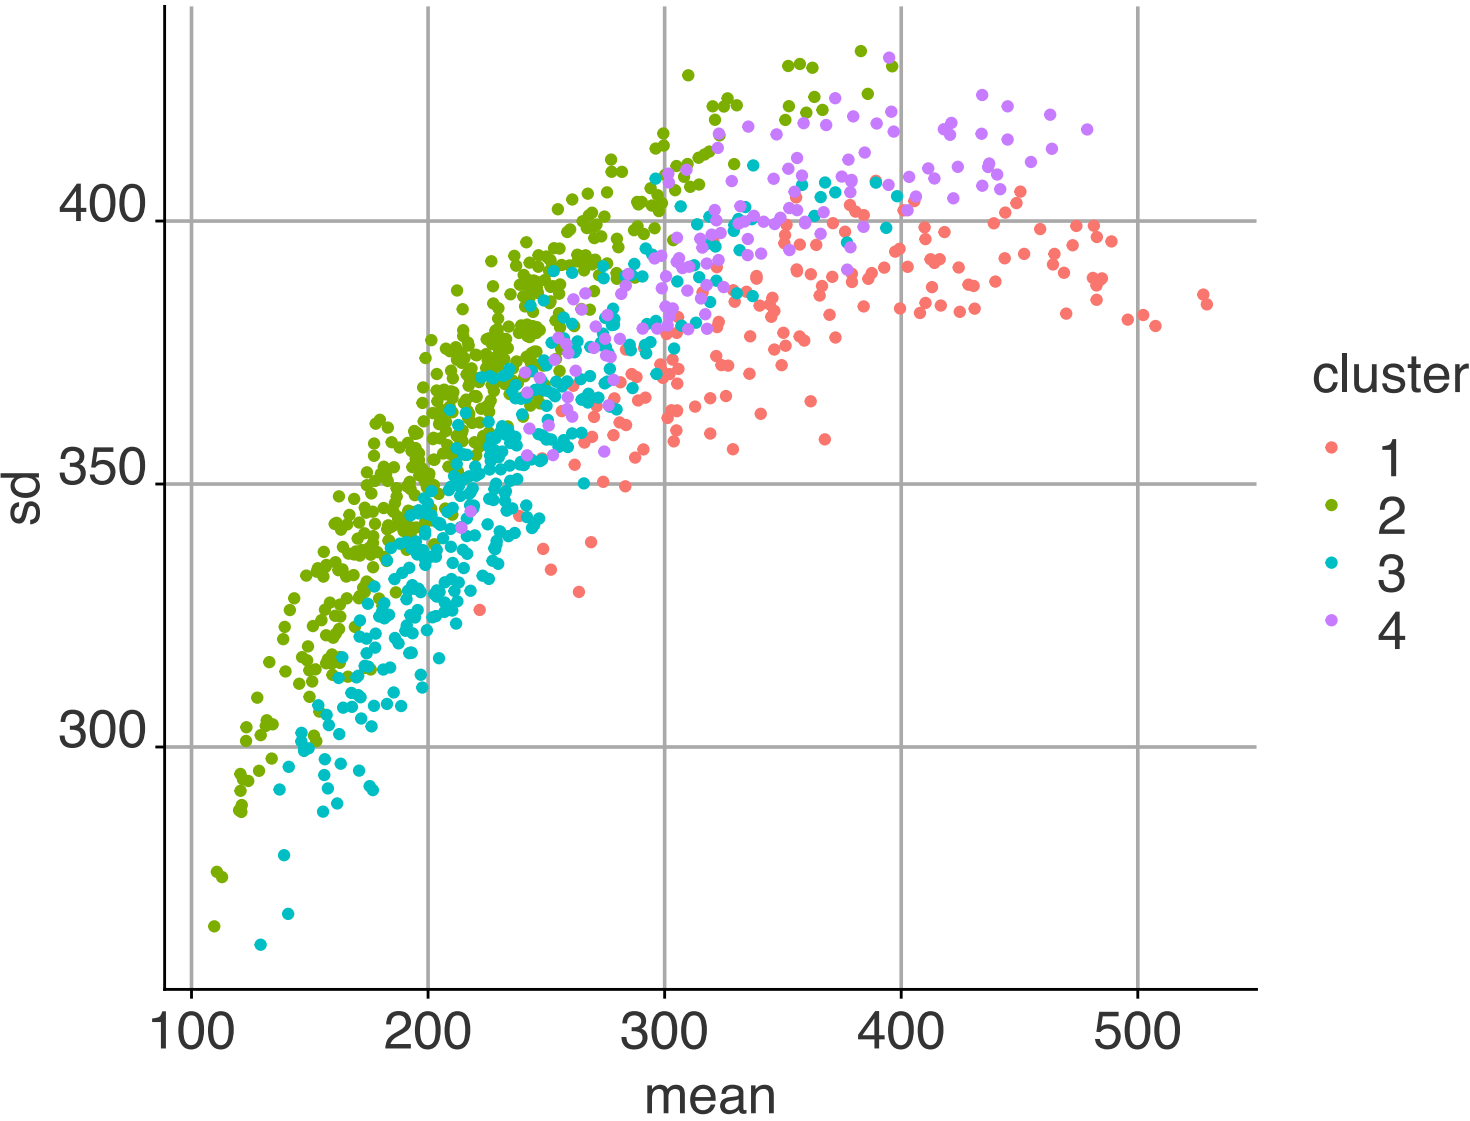

For 6 randomly selected samples we plot the densities of the reactions:

**TCGA.AN.A04C.01**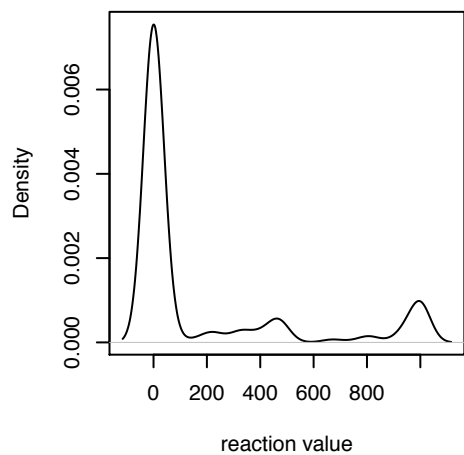**TCGA.BH.A0DS.01**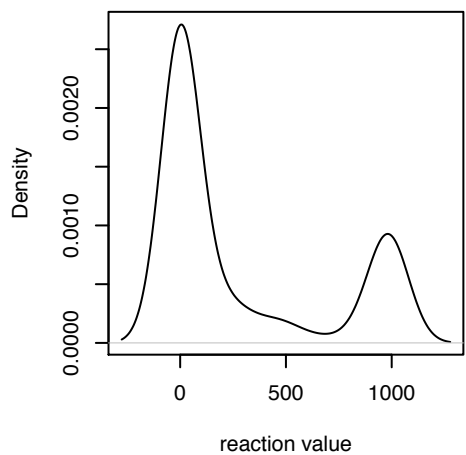**TCGA.4H.AAAK.01**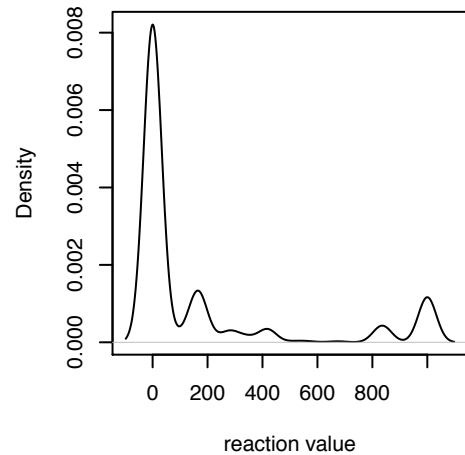**TCGA.A8.A0A7.01**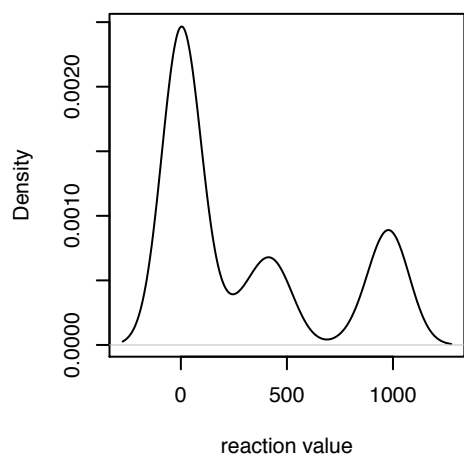**TCGA.A8.A076.01**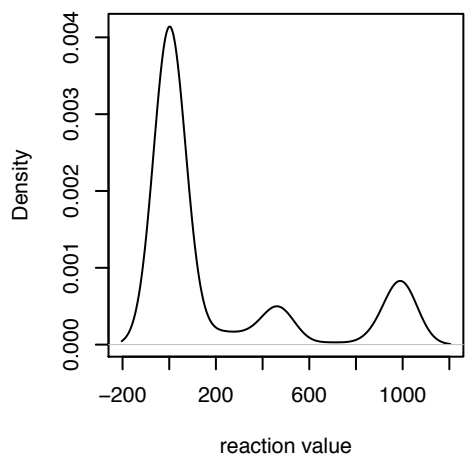**TCGA.A2.A259.01**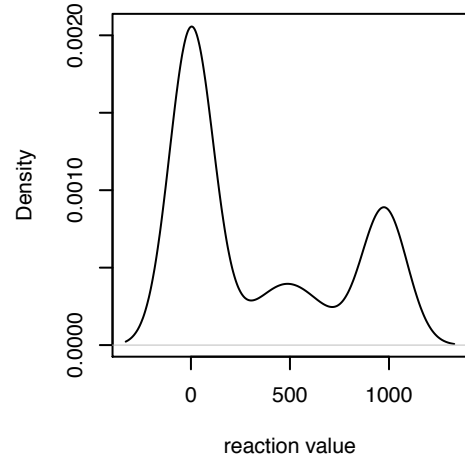

Here we draw the densities of 6 randomly selected reactions:

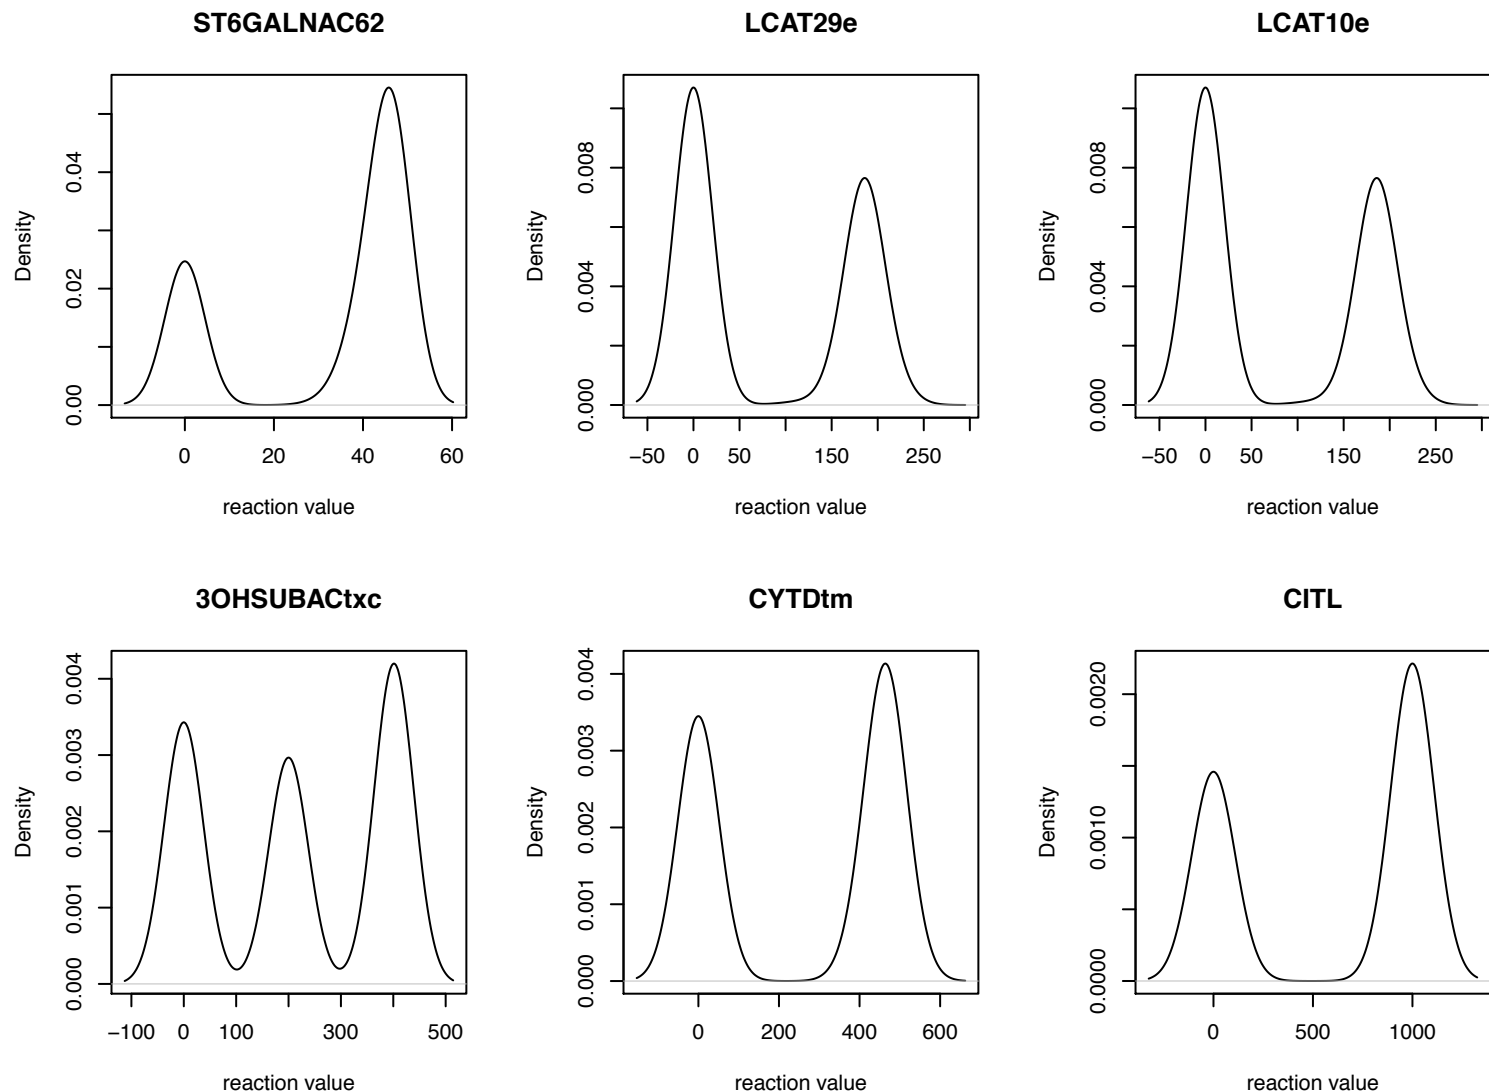

Given that reactions have a zero and a non-zero state, we convert the reaction data to binary (less than 10 = 0, 1 otherwise) and compute a  $\chi^2$  test between the four clusters.

|                    | statistic | pval | pbon |
|--------------------|-----------|------|------|
| 17AHPRGNLONEte     | 1100      | 0    | 0    |
| ACMPtu             | 1100      | 0    | 0    |
| AHANDROSTANte      | 1100      | 0    | 0    |
| ATVLACtu           | 1100      | 0    | 0    |
| C03681te           | 1100      | 0    | 0    |
| C05299te           | 1100      | 0    | 0    |
| C05301te           | 1100      | 0    | 0    |
| C05302te           | 1100      | 0    | 0    |
| CE2211te           | 1100      | 0    | 0    |
| CE5072te           | 1100      | 0    | 0    |
| CSAtd              | 1100      | 0    | 0    |
| CSAtu              | 1100      | 0    | 0    |
| EX_17ahprgnlone[e] | 1100      | 0    | 0    |
| EX_C03681[e]       | 1100      | 0    | 0    |
| EX_C05299[e]       | 1100      | 0    | 0    |
| EX_C05301[e]       | 1100      | 0    | 0    |
| EX_C05302[e]       | 1100      | 0    | 0    |
| EX_CE2211[e]       | 1100      | 0    | 0    |
| EX_CE5072[e]       | 1100      | 0    | 0    |
| EX_prgnlone[e]     | 1100      | 0    | 0    |
| EX_prgnlones[e]    | 1100      | 0    | 0    |
| LSTNtu             | 1100      | 0    | 0    |
| LVSTPGPt           | 1100      | 0    | 0    |
| LVSTtu             | 1100      | 0    | 0    |

|             | statistic | pval | pbon |
|-------------|-----------|------|------|
| MDZtd       | 1100      | 0    | 0    |
| MDZtu       | 1100      | 0    | 0    |
| PRGNLONeSte | 1100      | 0    | 0    |
| PRGNLONeTe  | 1100      | 0    | 0    |
| RE1587C     | 1100      | 0    | 0    |
| RE1630C     | 1100      | 0    | 0    |

We find that many reactions have identical states among samples when binarized (i.e. they are zero in the same samples and non-zero in the same samples). For example, when ranked with the above  $\chi^2$  test, the first 38 reactions have the same zero/non-zero states and the next 44 reactions have the same states.

This is the very first reaction (the first 38 reactions have the same test statistics) after ranking with the  $\chi^2$  test:

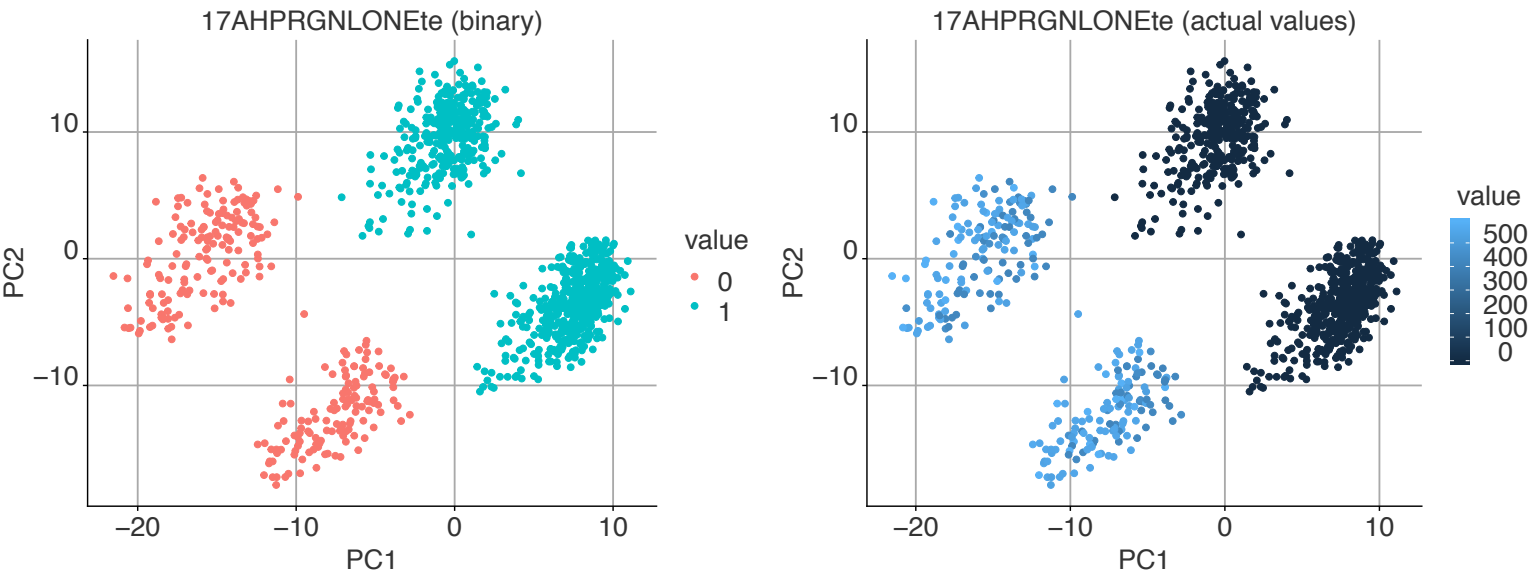

This is the 39th ranking reaction:

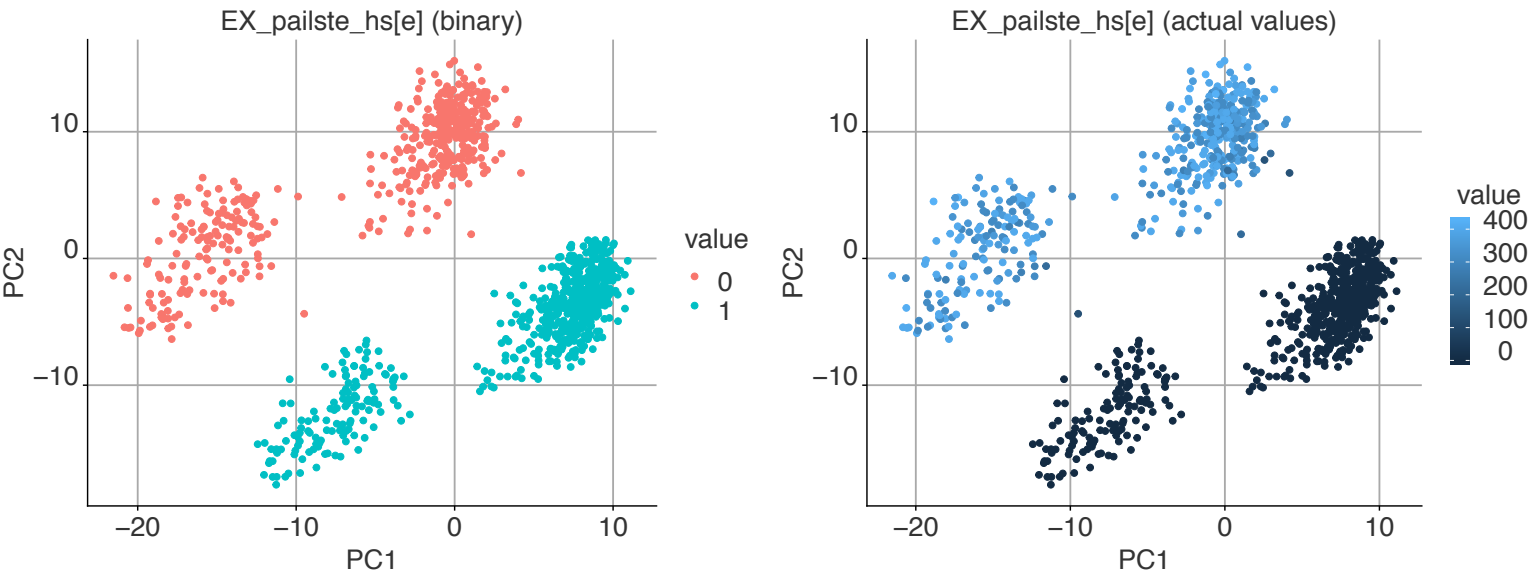

100th ranking reaction:

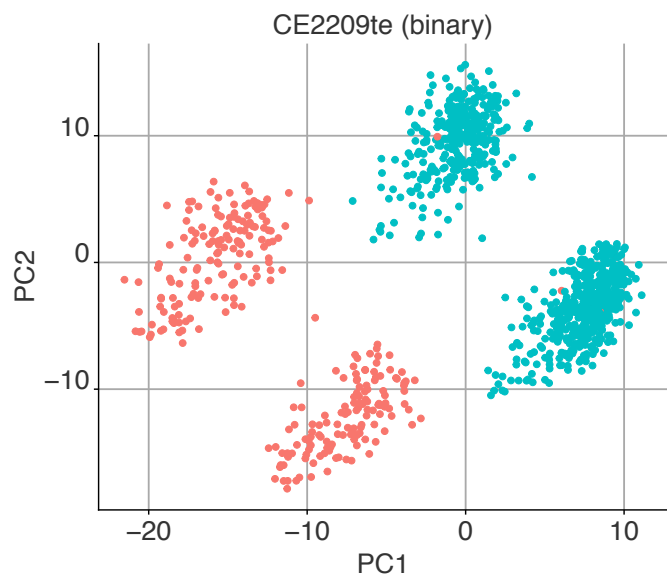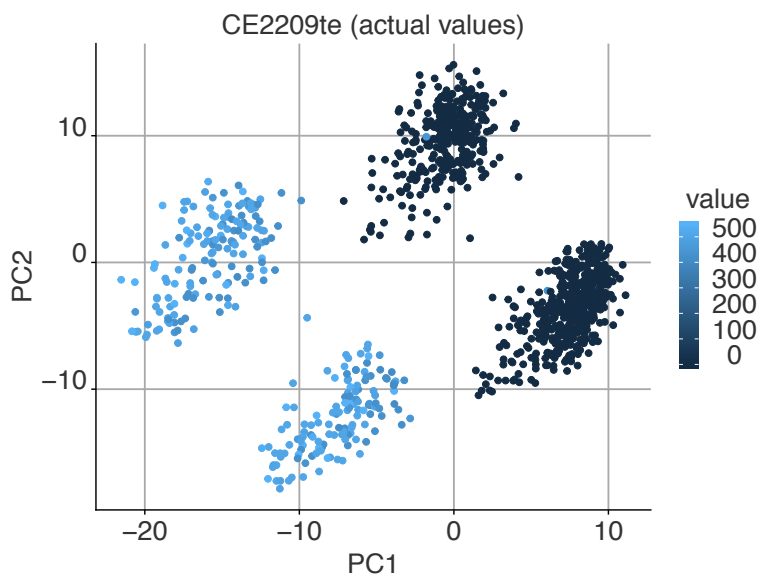

110th ranking reaction:

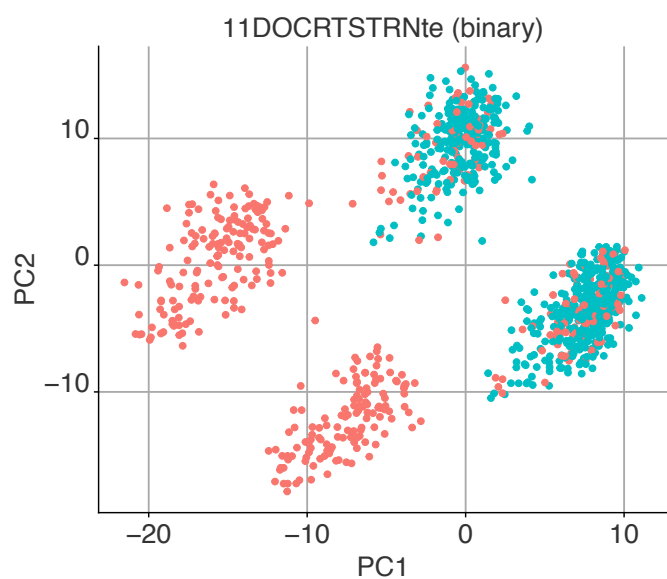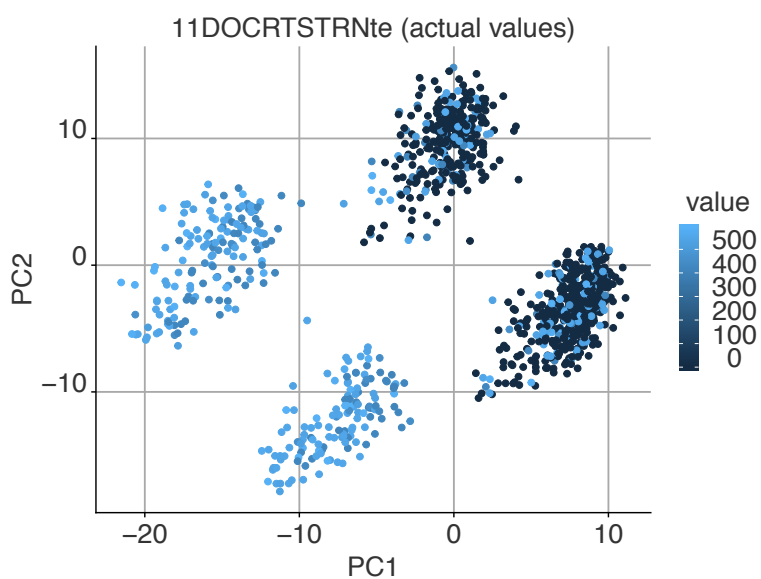

150th ranking reaction:

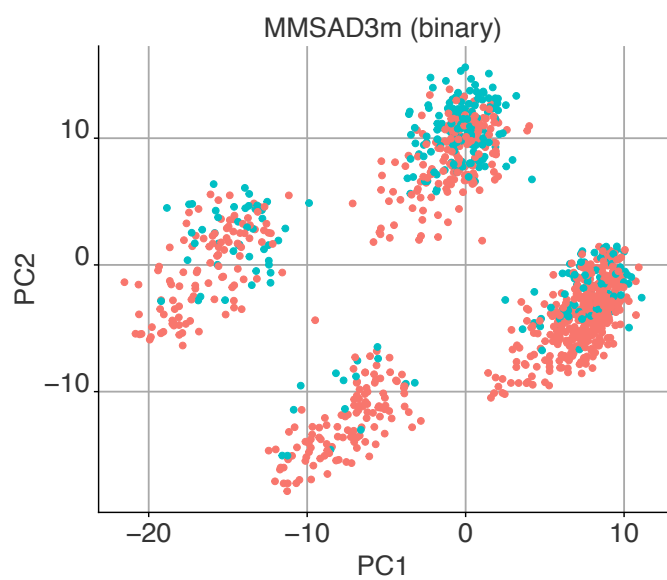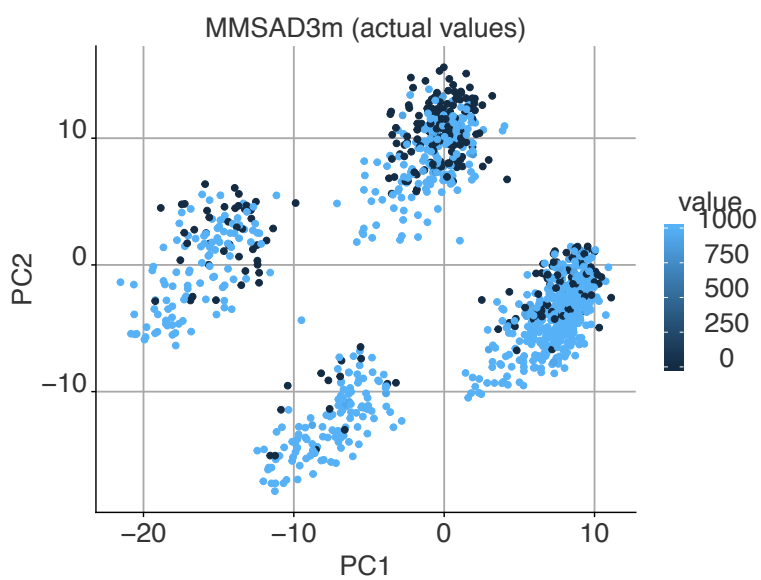

## 6 Analysis of divergence data

We next perform a  $\chi^s$  test with the divergence values for the 4 clusters.



|          | statistic | pval | pbon |
|----------|-----------|------|------|
| ABCB1    | 1100.0000 | 0    | 0    |
| LCAT     | 1097.7115 | 0    | 0    |
| DARC     | 456.6299  | 0    | 0    |
| FREM1    | 425.6843  | 0    | 0    |
| S1PR1    | 398.4353  | 0    | 0    |
| EMCN     | 356.8341  | 0    | 0    |
| MEOX1    | 355.6835  | 0    | 0    |
| SELP     | 369.6766  | 0    | 0    |
| TSPAN7   | 352.5677  | 0    | 0    |
| DNASE1L3 | 330.7277  | 0    | 0    |
| MMRN2    | 327.3382  | 0    | 0    |
| CCL14    | 322.8991  | 0    | 0    |
| GIPC2    | 322.6501  | 0    | 0    |
| RASGRP2  | 315.3382  | 0    | 0    |
| NRIP2    | 312.2394  | 0    | 0    |
| LCN10    | 305.7732  | 0    | 0    |
| ADCY4    | 305.7314  | 0    | 0    |
| SCN3A    | 301.8932  | 0    | 0    |
| TNXB     | 287.4456  | 0    | 0    |
| GIMAP8   | 300.2883  | 0    | 0    |
| CADM3    | 299.5878  | 0    | 0    |
| GRRP1    | 298.7082  | 0    | 0    |
| PEAR1    | 284.3775  | 0    | 0    |
| TSHZ2    | 297.6442  | 0    | 0    |
| AVPR2    | 281.5979  | 0    | 0    |
| TGFBR2   | 293.6934  | 0    | 0    |
| CXorf36  | 293.3908  | 0    | 0    |
| INMT     | 278.8178  | 0    | 0    |
| LDB2     | 274.6064  | 0    | 0    |
| ABCA10   | 274.0227  | 0    | 0    |

We plot the clusters and color the samples by divergence state and expression (TPM) value for some of the top ranking genes:

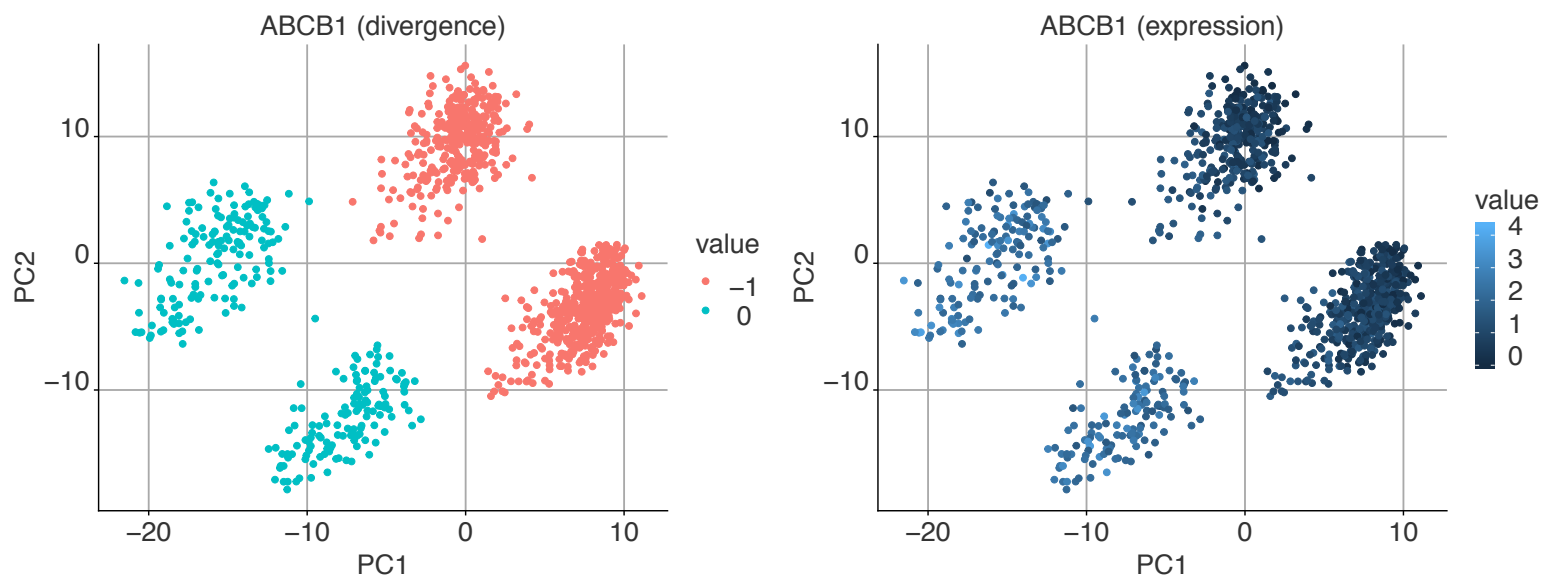

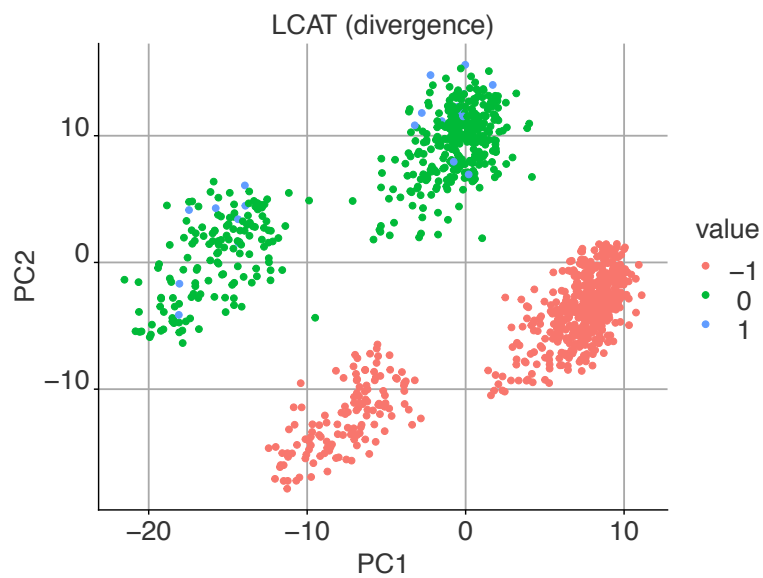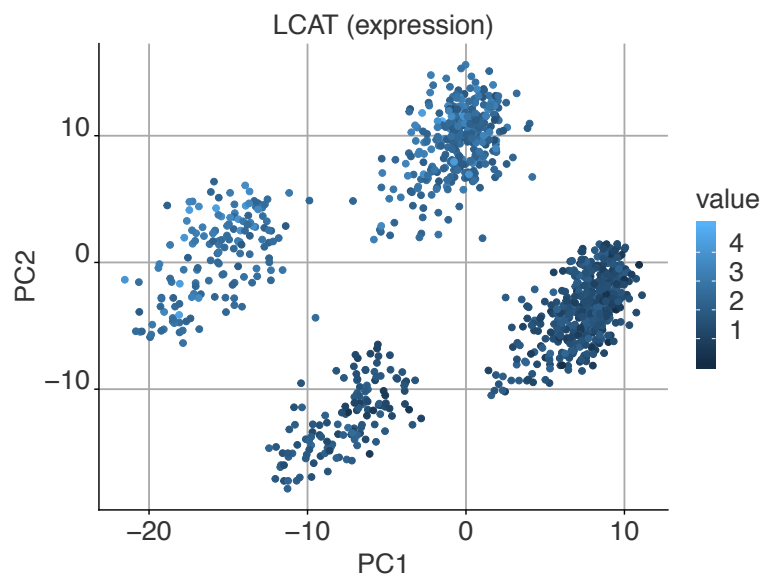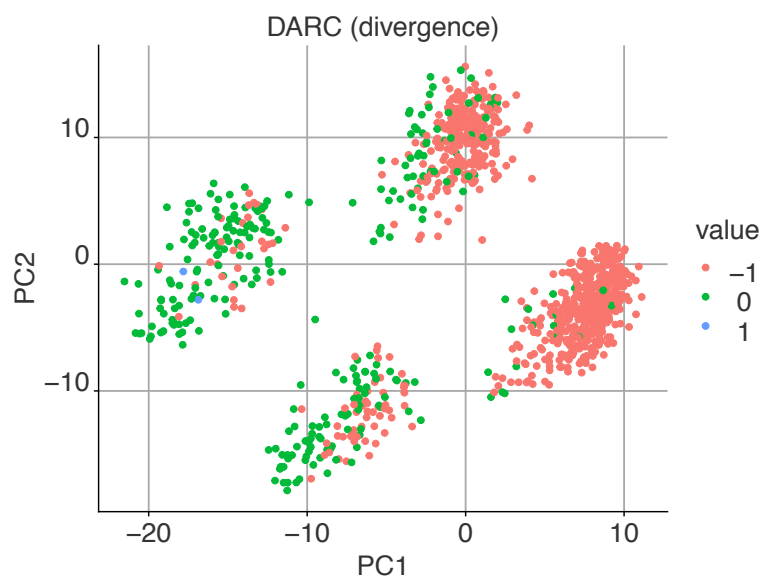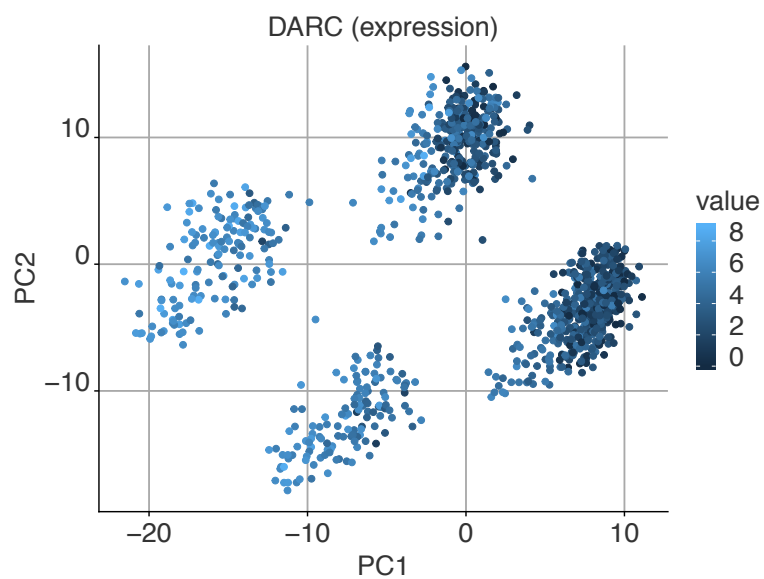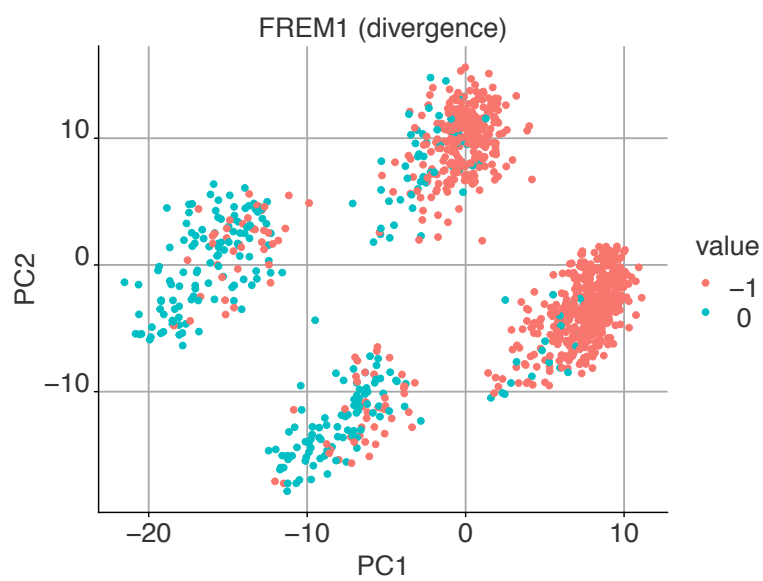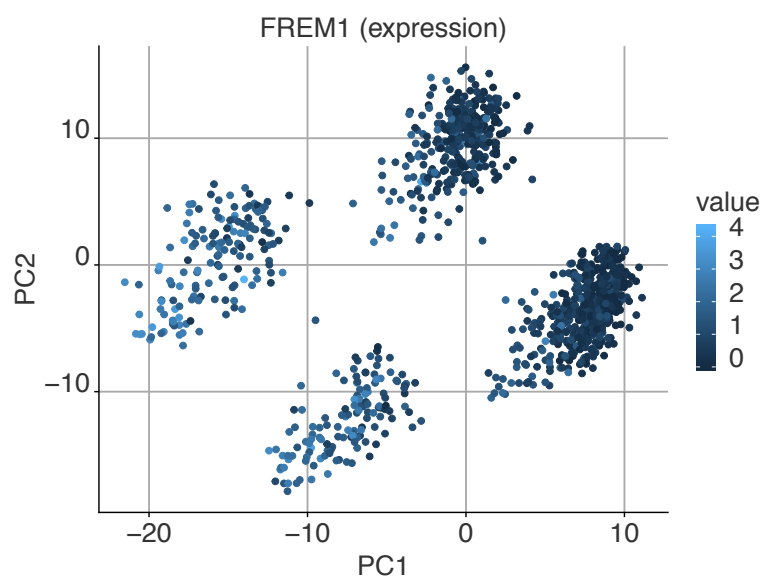

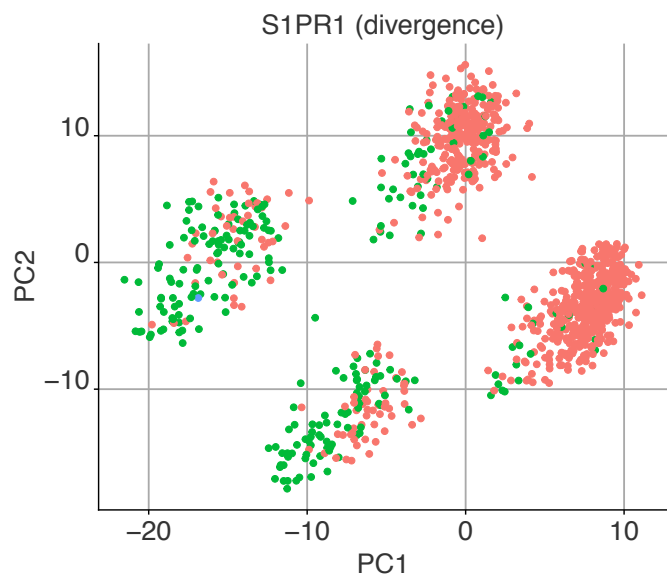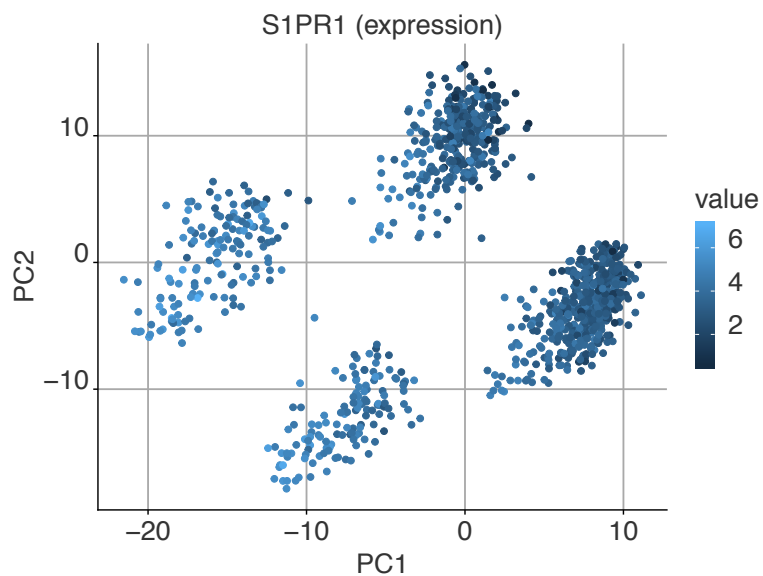

## 7 Molecular Checks

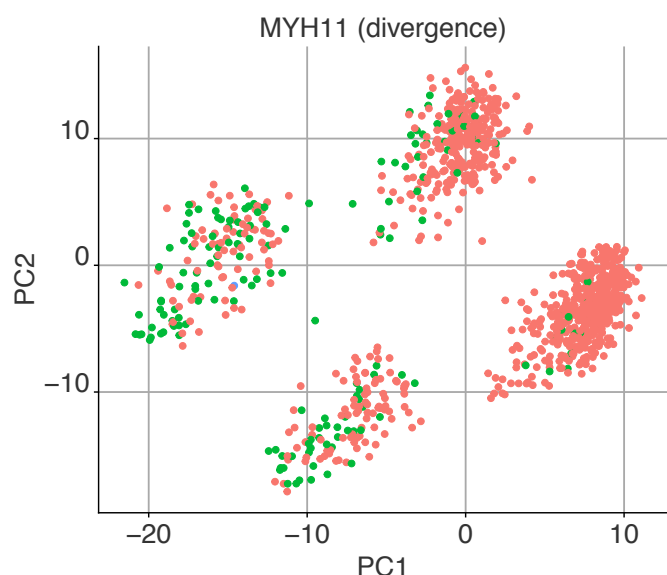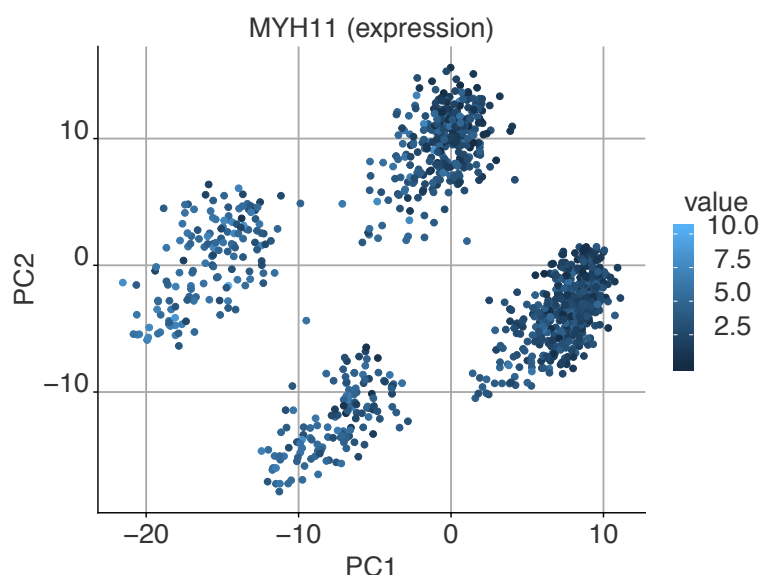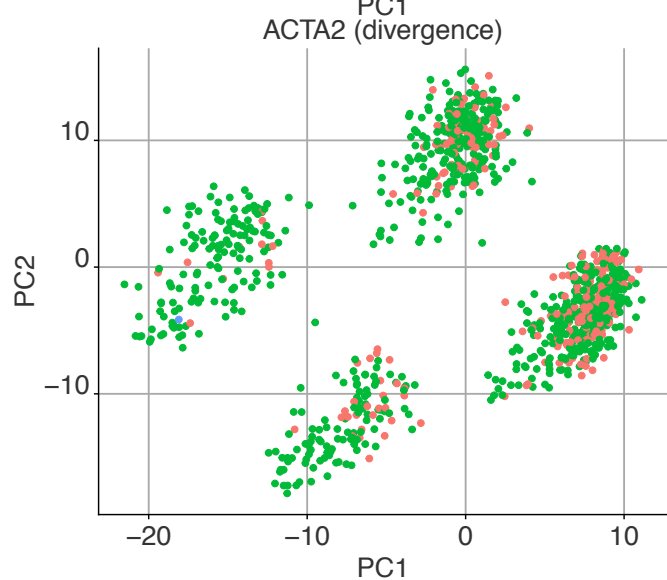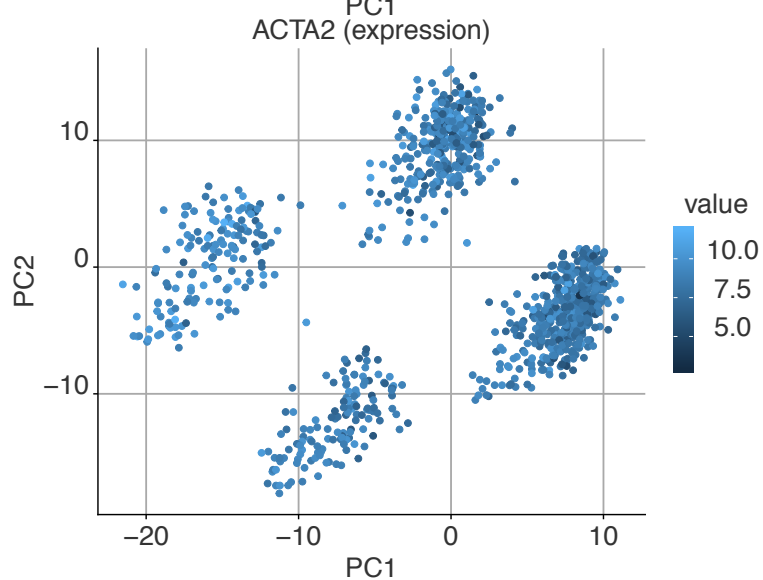

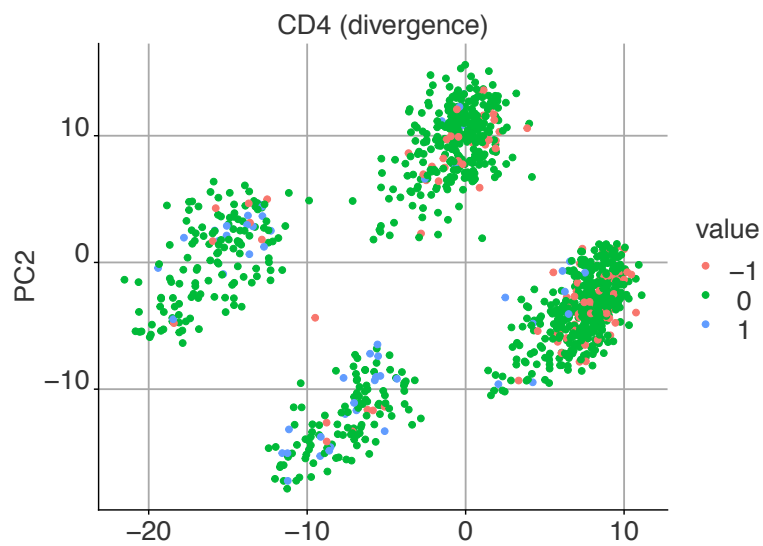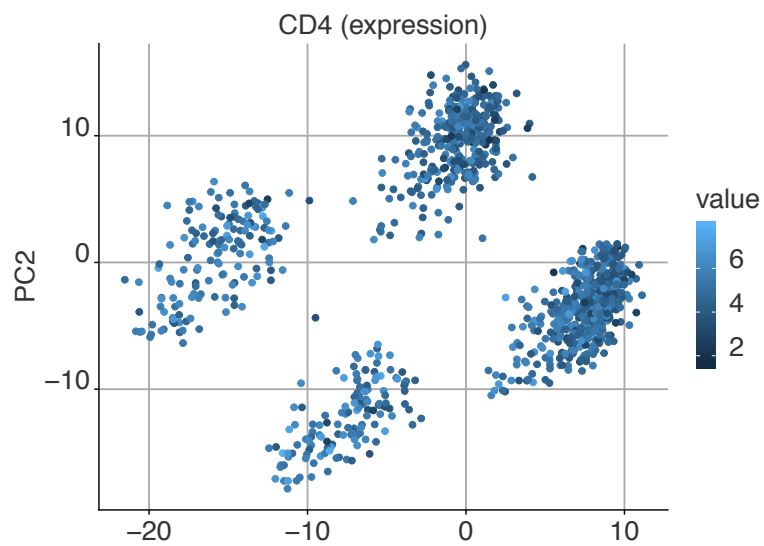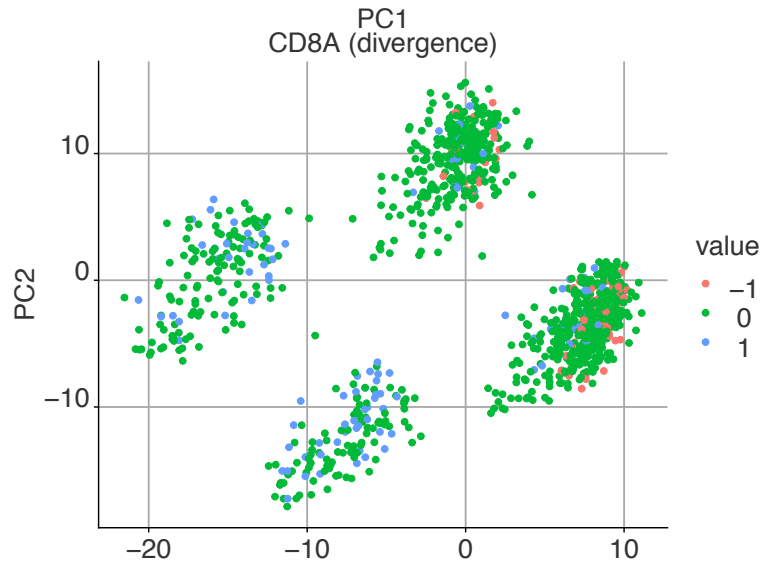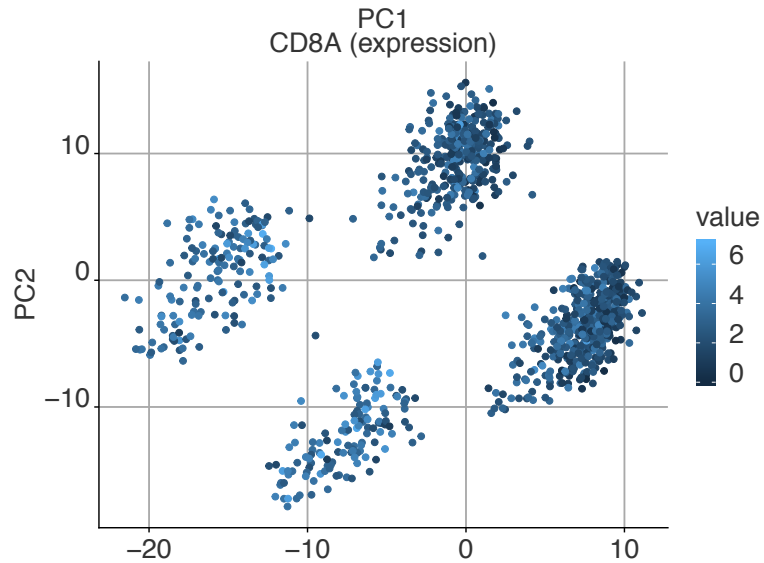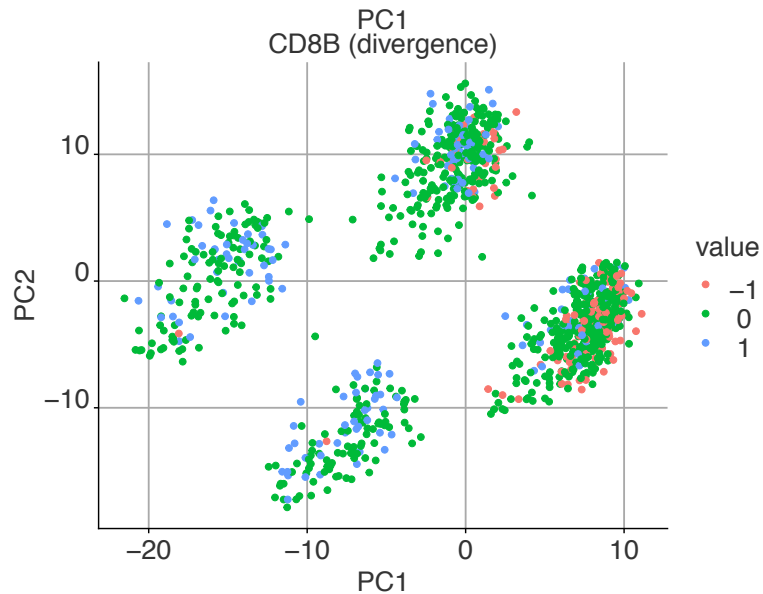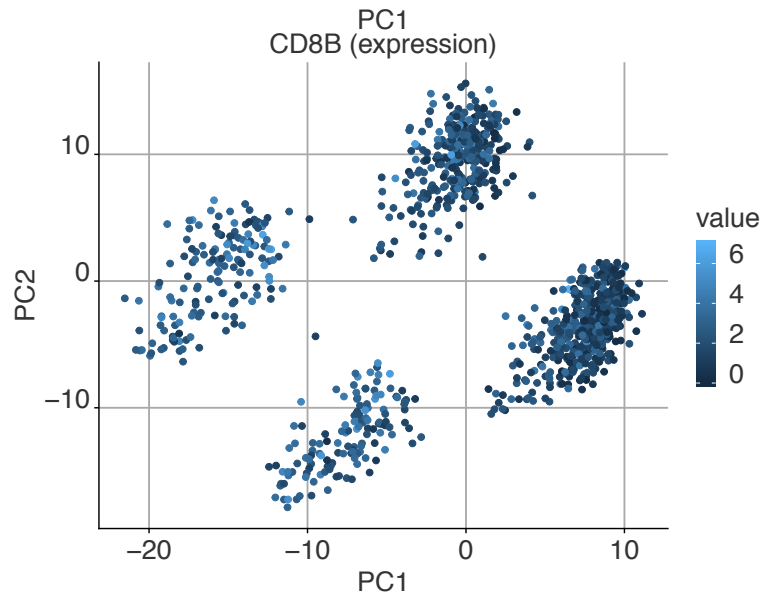

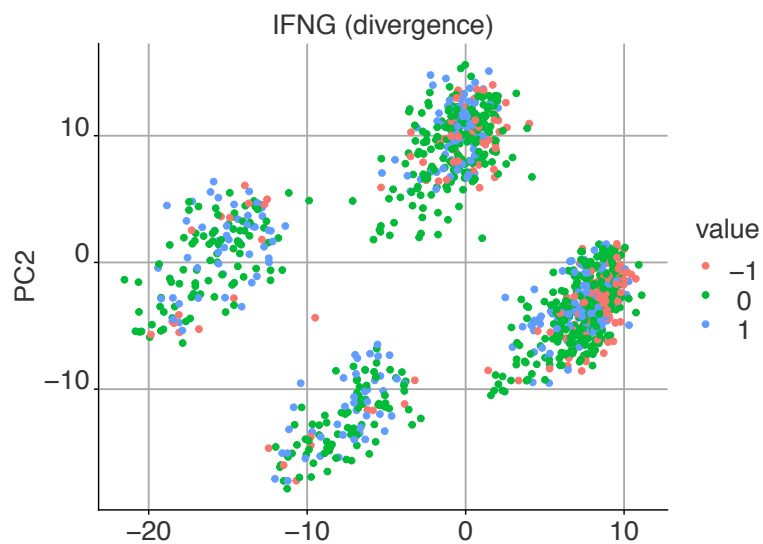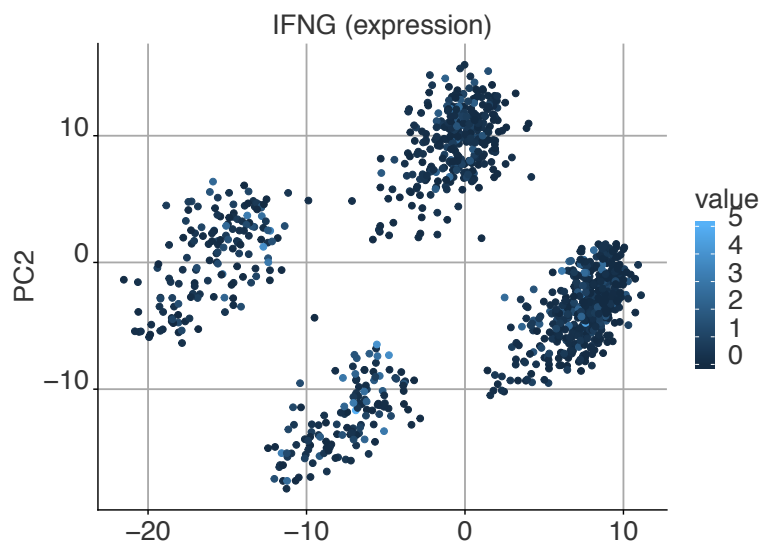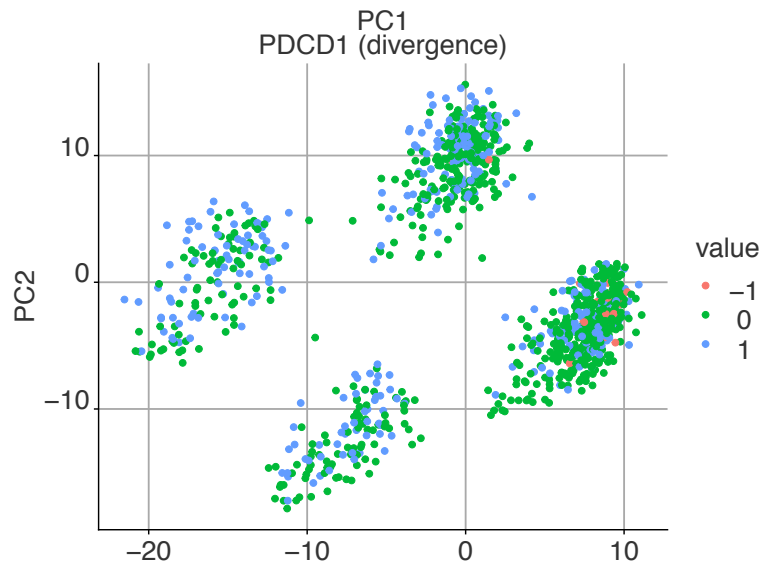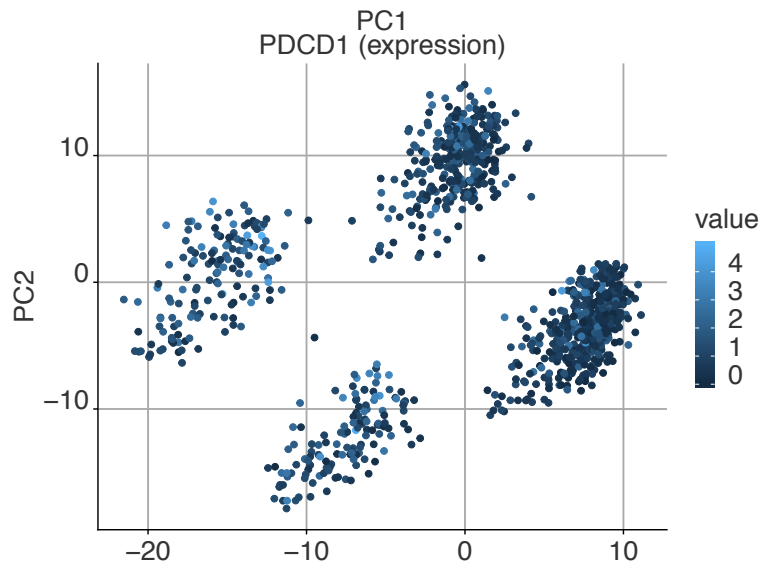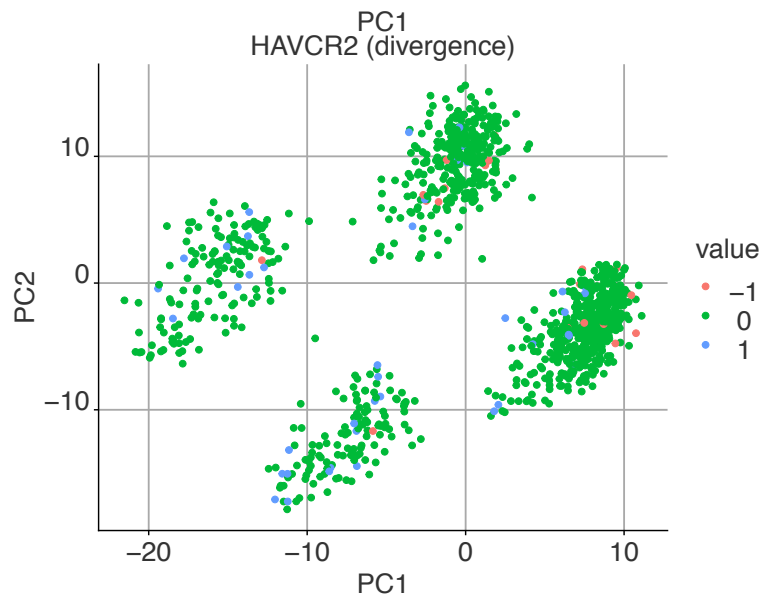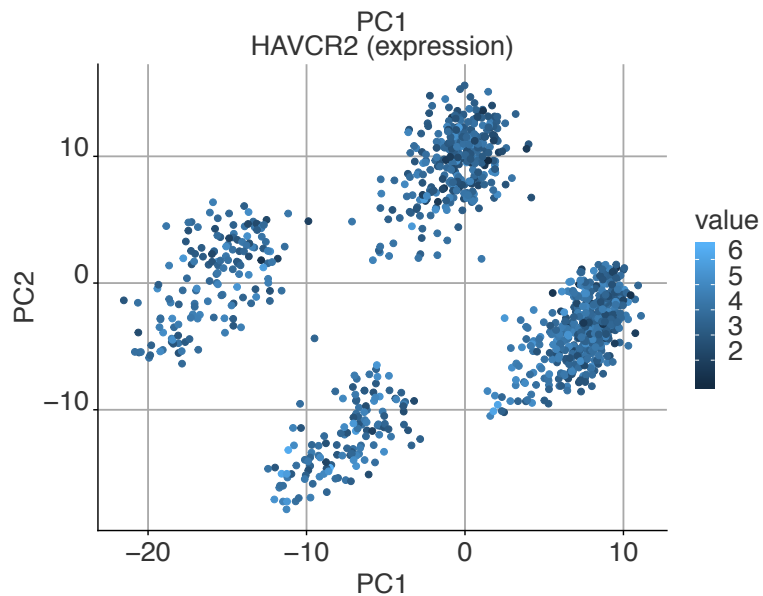

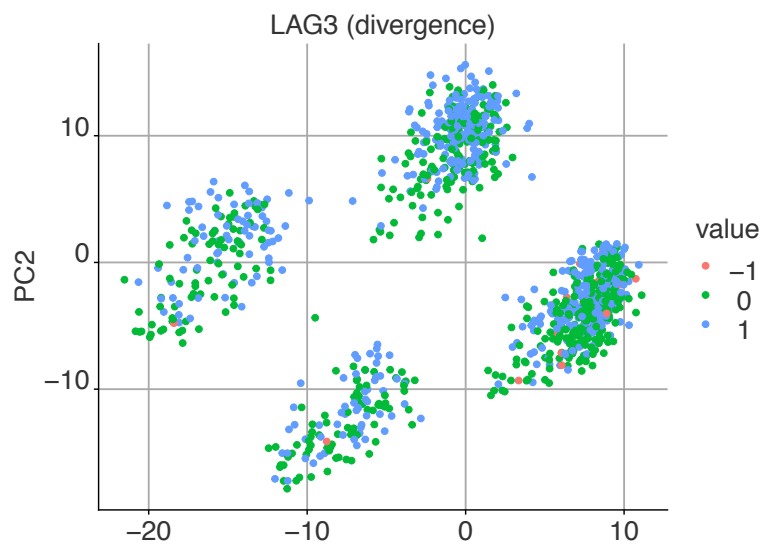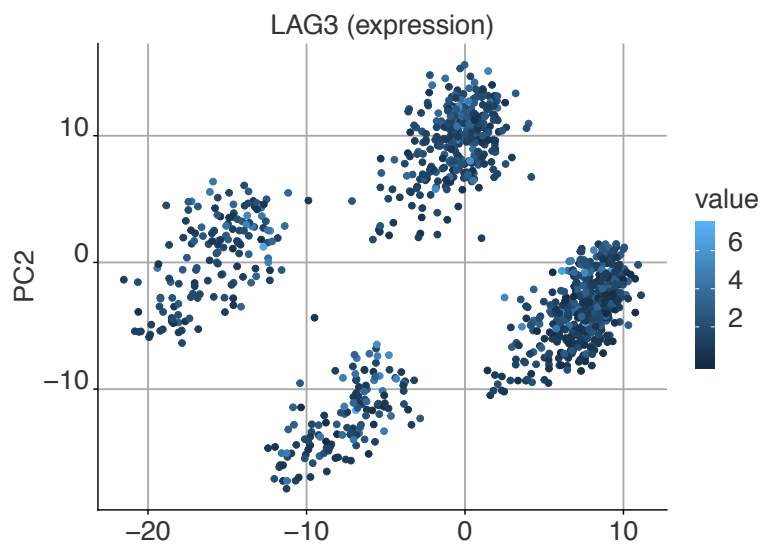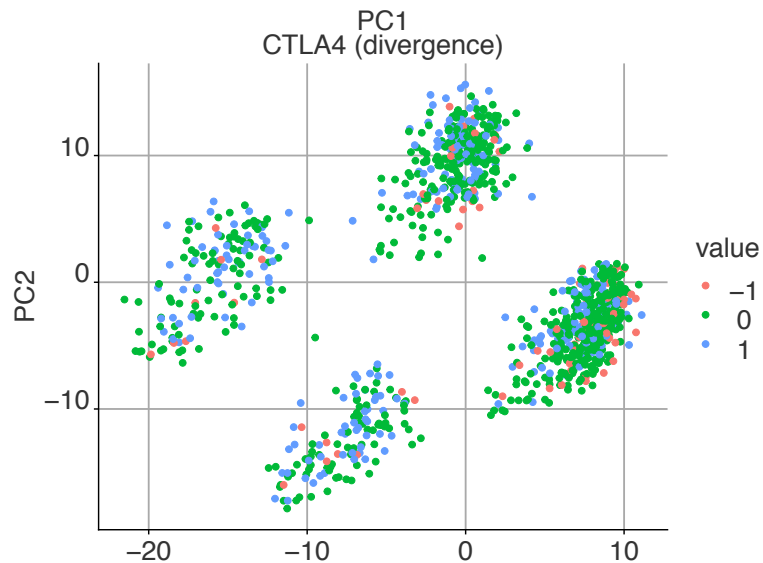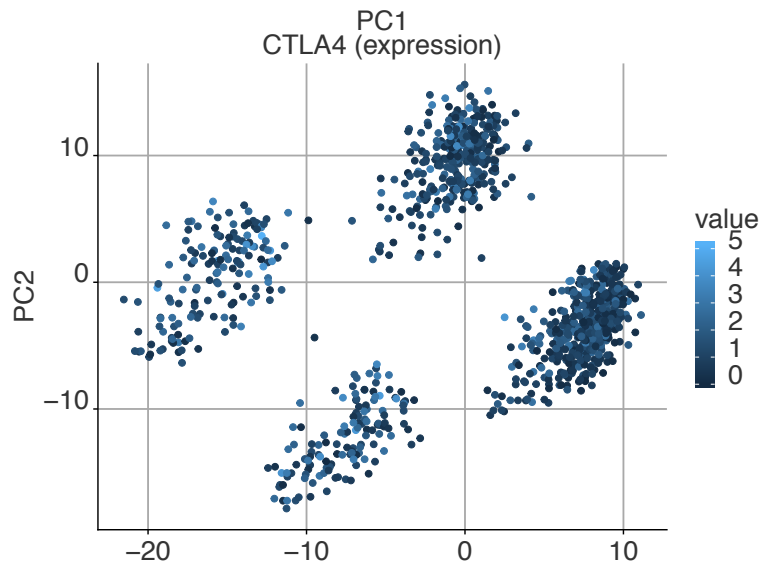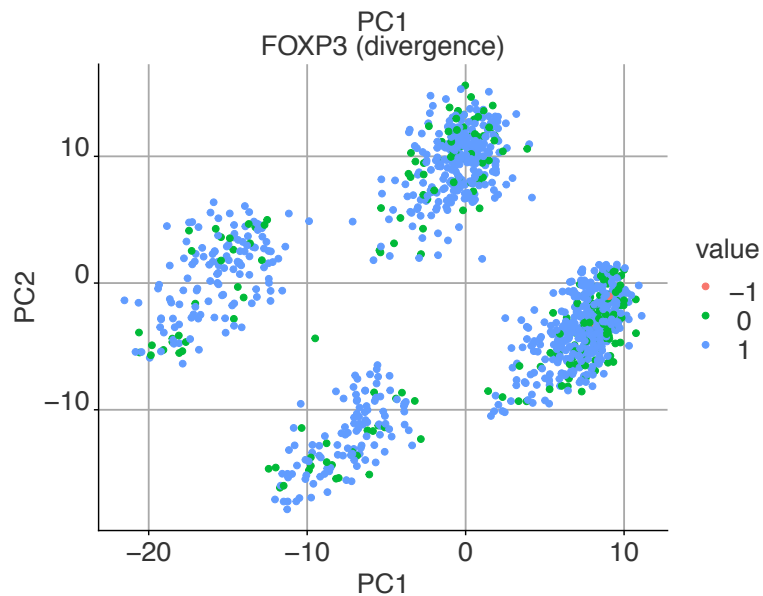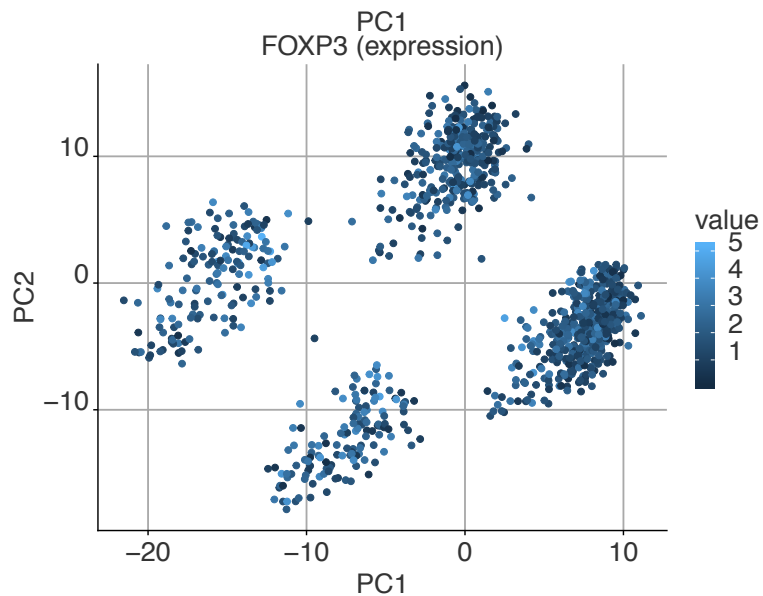

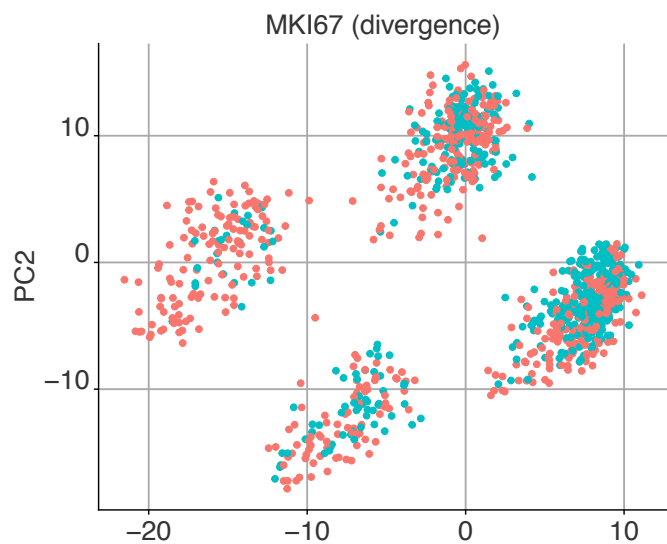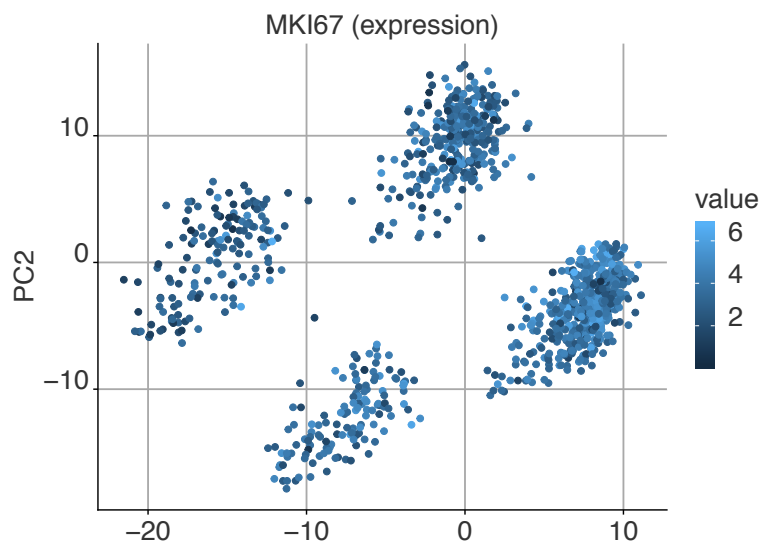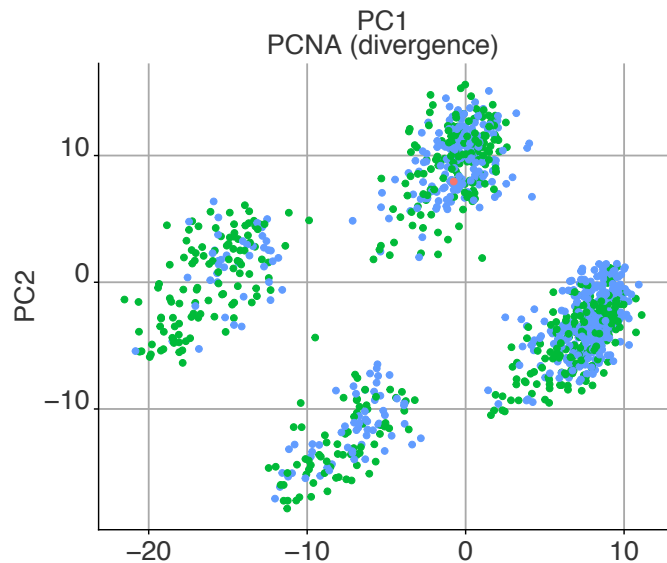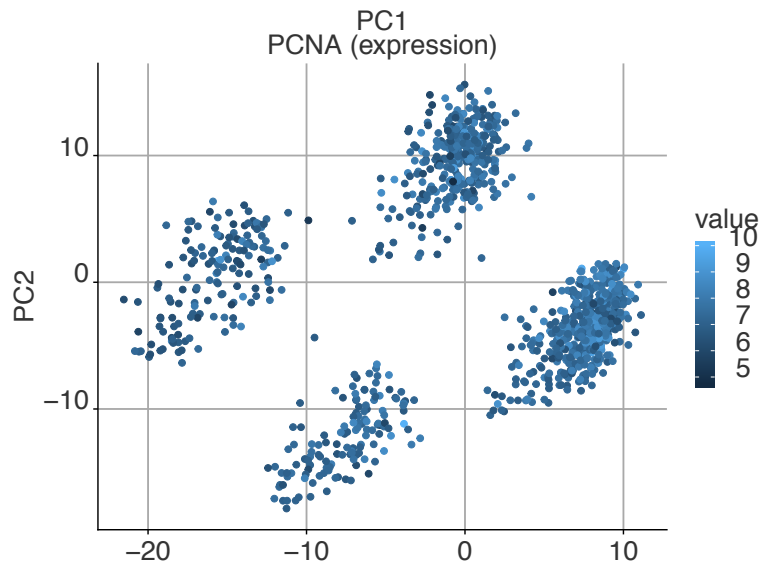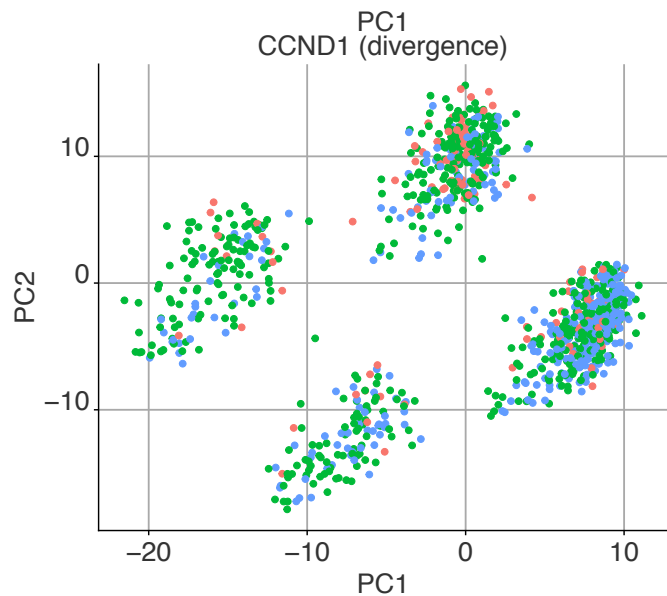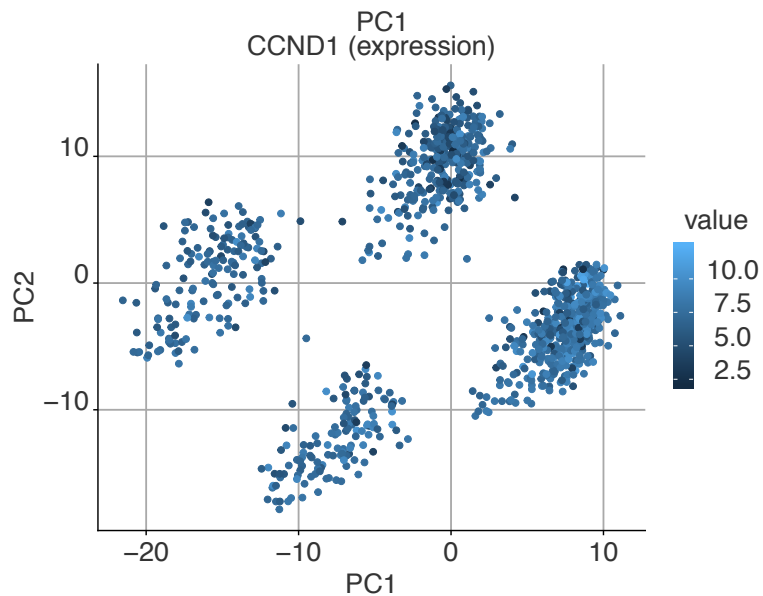



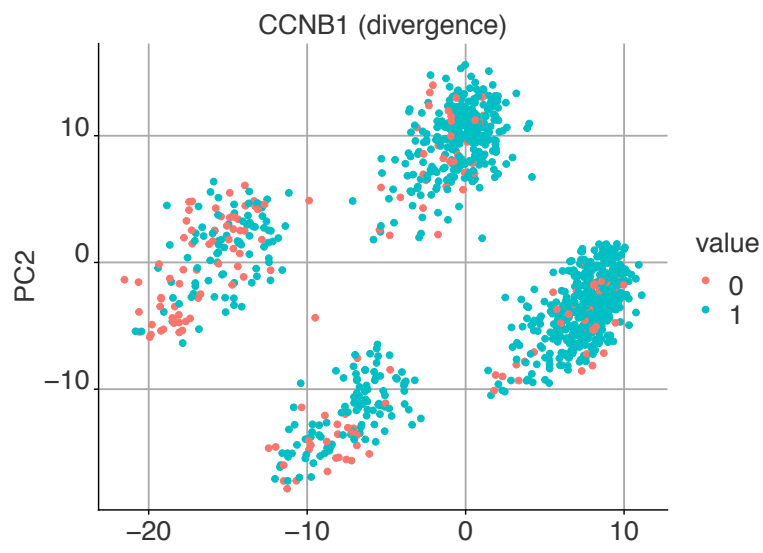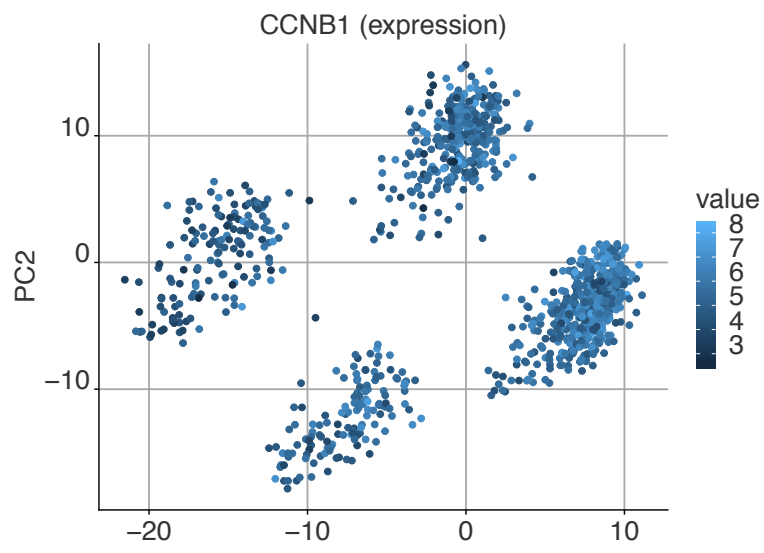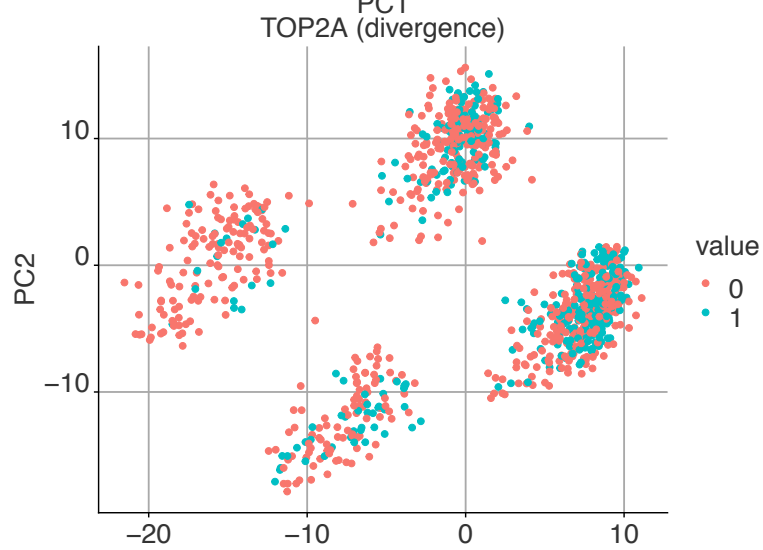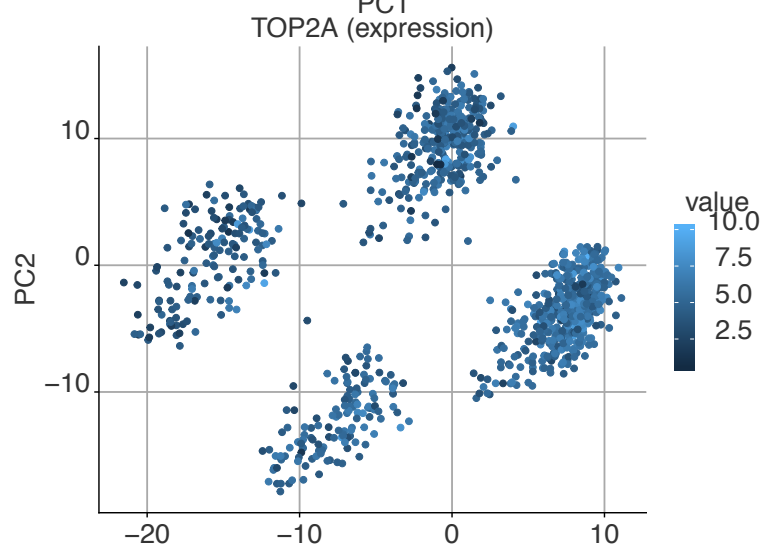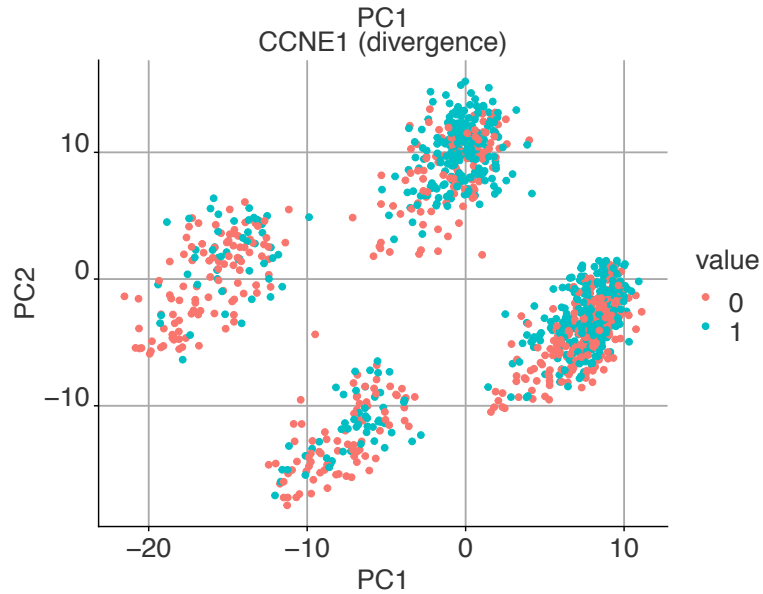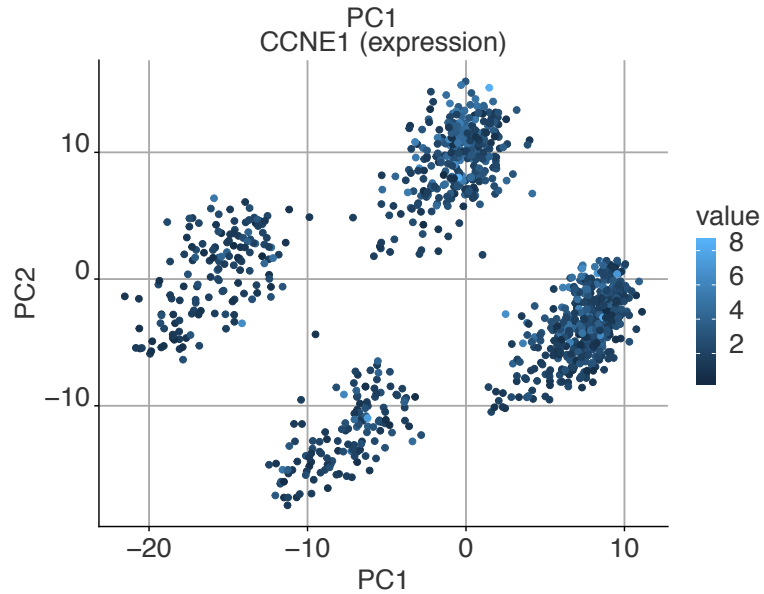



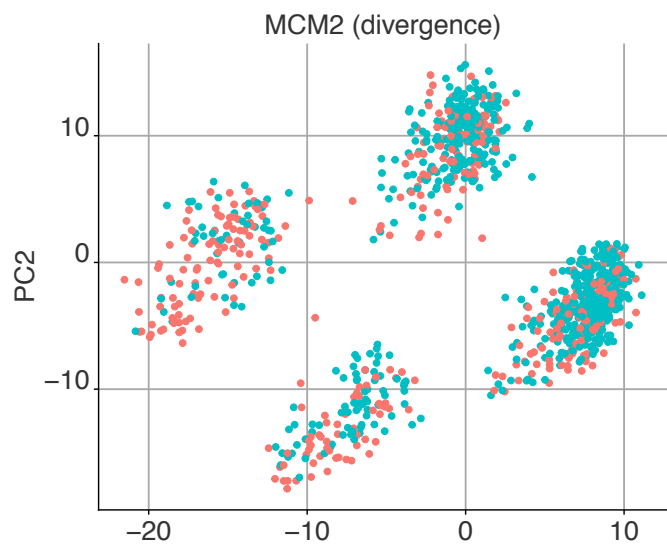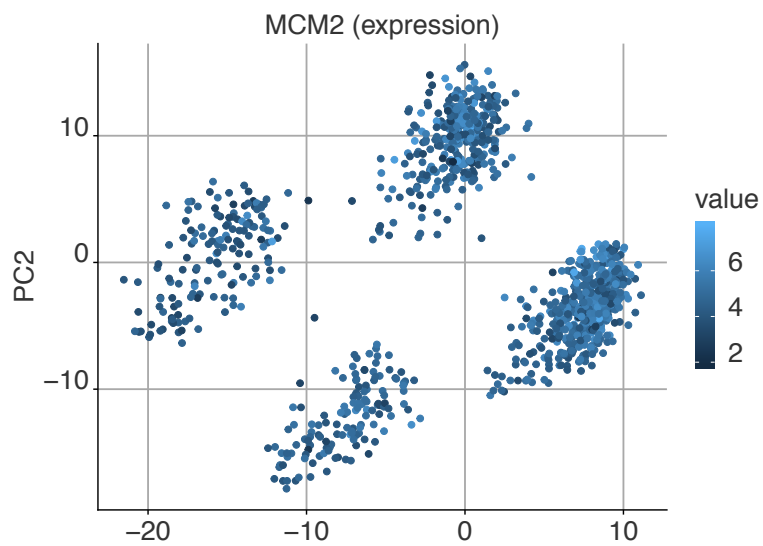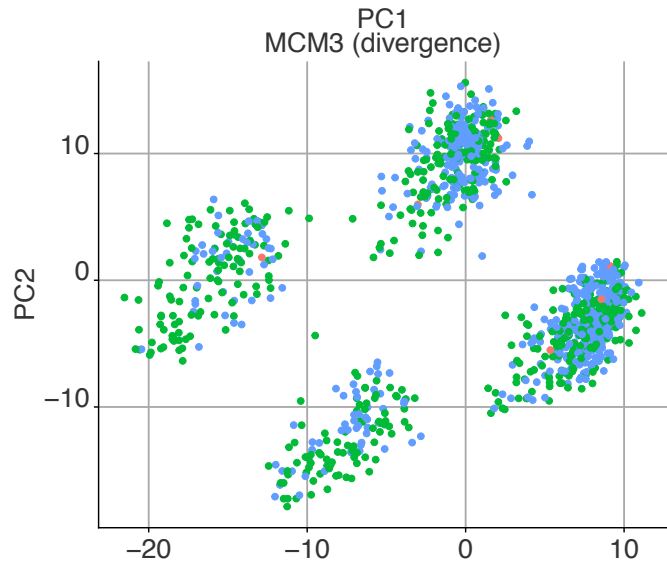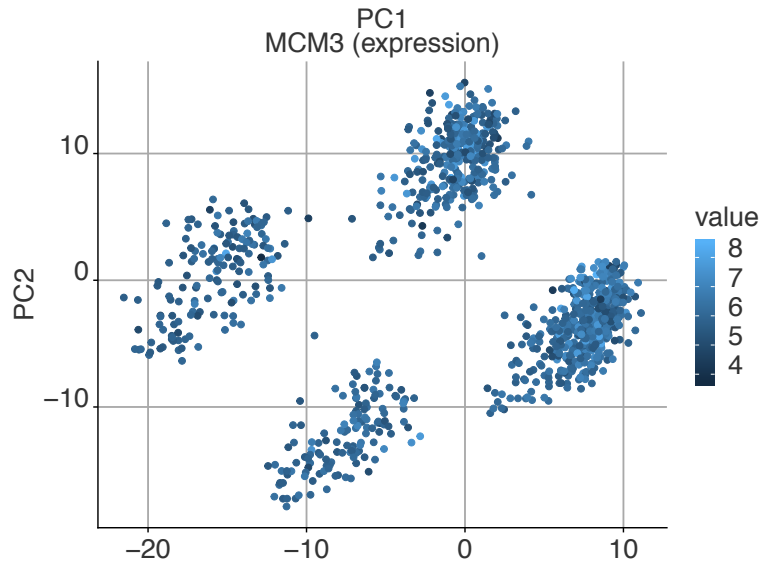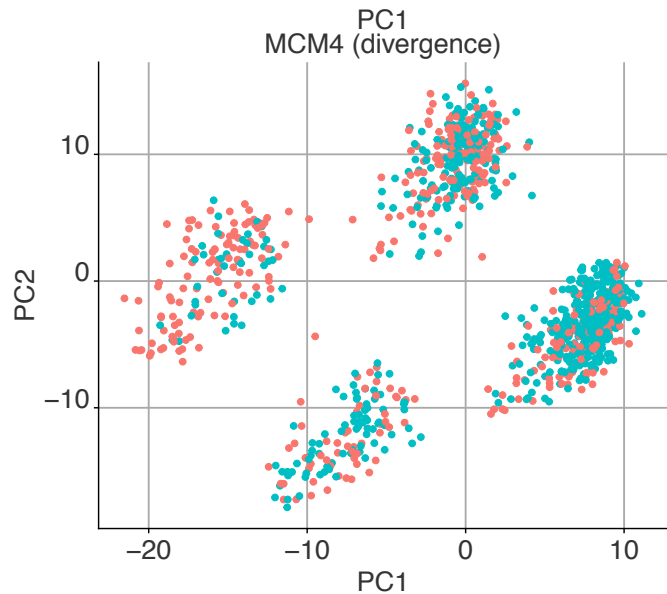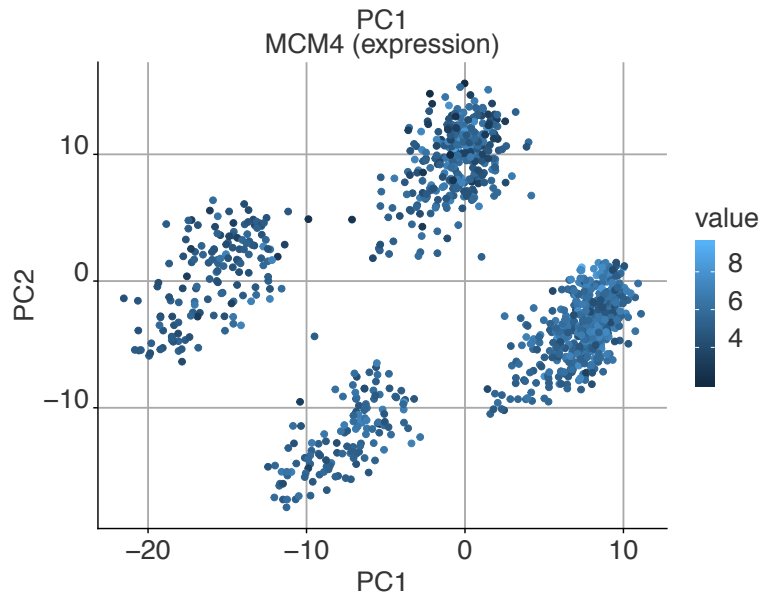

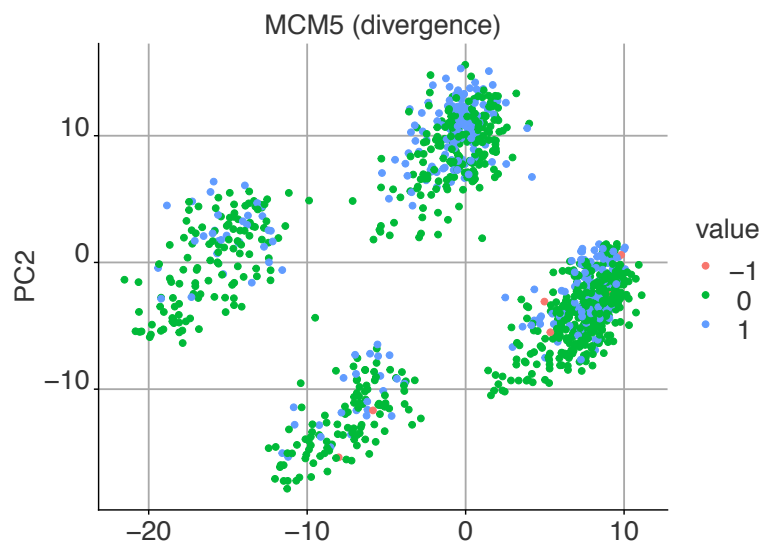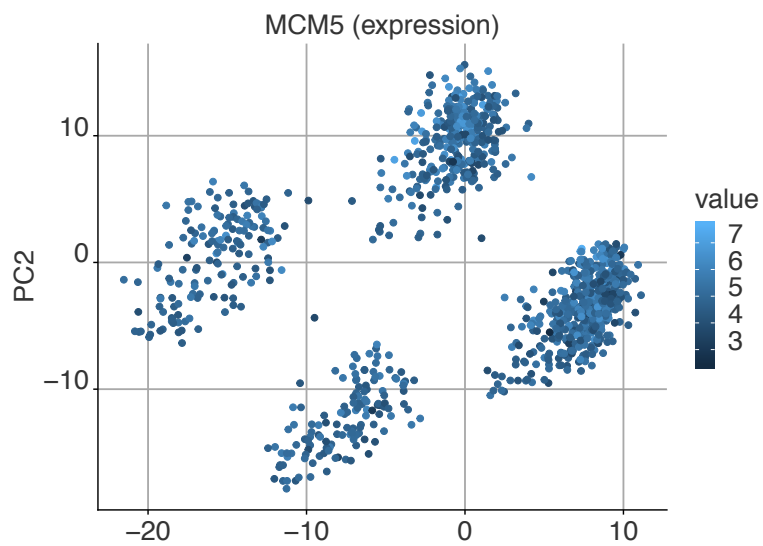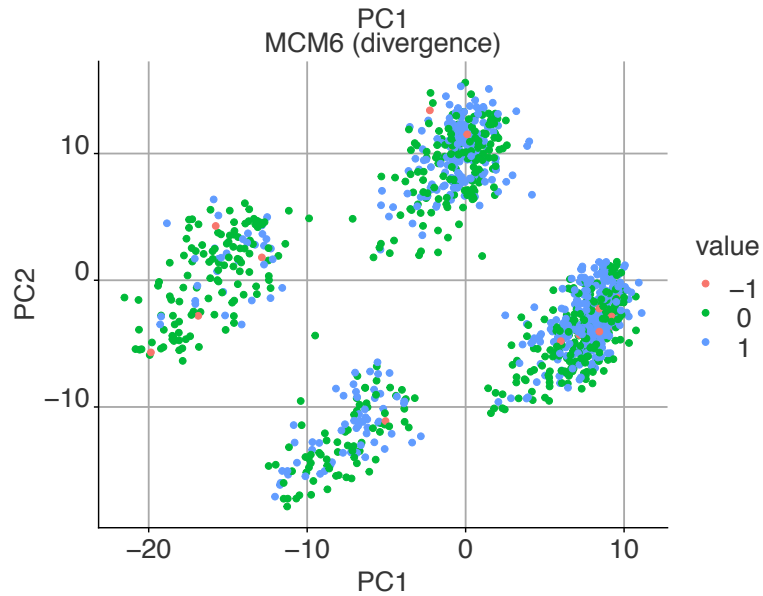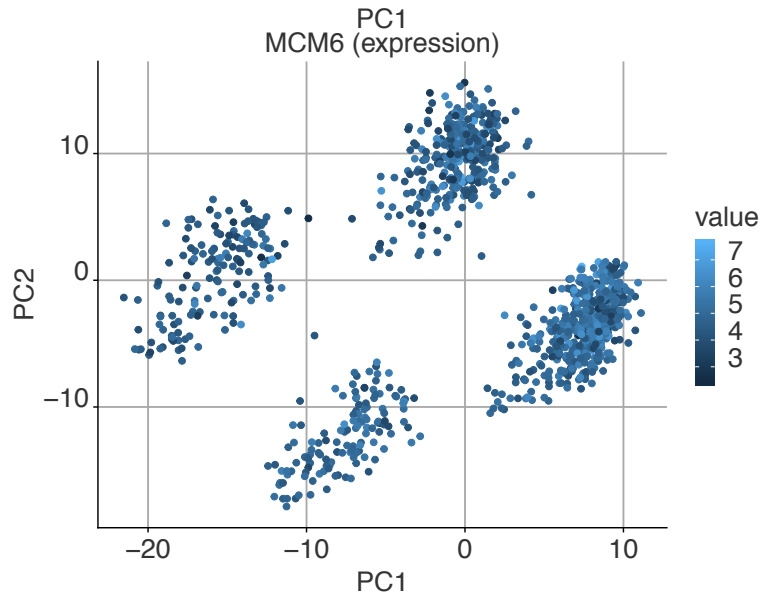

Supplement: Supplementary file 4 [file supplementary]
