# Supplementary material for: Identifying personalized metabolic signatures in breast cancer
Source: Preprints.org preprint supplement (doi:10.20944/preprints202011.0474.v1), 2020-11-18
Supplement: Supplementary file 1 [file supplementary]

## Sheet: Drug_impact_result
Supplementary file 2: Drug sensitivity results for 1156 samples
Cohort	Drug	Brand name	Target	Score	# sign. samples	TCGA.3C.AAAU.01	TCGA.A1.A0SD.01	TCGA.A2.A259.01	TCGA.E9.A3QA.01	TCGA.E9.A3X8.01	TCGA.E9.A54X.01	TCGA.E9.A54Y.01	TCGA.E9.A5FK.01	TCGA.E9.A5FL.01	TCGA.E9.A5UO.01	TCGA.E9.A5UP.01	TCGA.E9.A6HE.01	TCGA.EW.A1IW.01	TCGA.A2.A25A.01	TCGA.EW.A1IX.01	TCGA.EW.A1IY.01	TCGA.EW.A1IZ.01	TCGA.EW.A1J1.01	TCGA.EW.A1J2.01	TCGA.EW.A1J3.01	TCGA.EW.A1J5.01	TCGA.EW.A1J6.01	TCGA.EW.A1OV.01	TCGA.EW.A1OW.01	TCGA.A2.A25B.01	TCGA.EW.A1OX.01	TCGA.EW.A1OY.01	TCGA.EW.A1OZ.01	TCGA.EW.A1P0.01	TCGA.EW.A1P1.01	TCGA.EW.A1P3.01	TCGA.EW.A1P4.01	TCGA.EW.A1P5.01	TCGA.EW.A1P6.01	TCGA.EW.A1P7.01	TCGA.A2.A25C.01	TCGA.EW.A1P8.01	TCGA.EW.A1PA.01	TCGA.EW.A1PB.01	TCGA.EW.A1PC.01	TCGA.EW.A1PD.01	TCGA.EW.A1PE.01	TCGA.EW.A1PF.01	TCGA.EW.A1PG.01
Sex						0	FEMALE	FEMALE	0	0	0	0	0	0	0	0	0	FEMALE	FEMALE	FEMALE	FEMALE	FEMALE	FEMALE	FEMALE	FEMALE	FEMALE	FEMALE	FEMALE	FEMALE	FEMALE	FEMALE	FEMALE	FEMALE	FEMALE	FEMALE	FEMALE	FEMALE	FEMALE	FEMALE	FEMALE	FEMALE	FEMALE	FEMALE	FEMALE	0	MALE	FEMALE	FEMALE	FEMALE
Tissue-type						Primary Tumor	Primary Tumor	Primary Tumor	Primary Tumor	Primary Tumor	Primary Tumor	Primary Tumor	Primary Tumor	Primary Tumor	Primary Tumor	Primary Tumor	Primary Tumor	Primary Tumor	Primary Tumor	Primary Tumor	Primary Tumor	Primary Tumor	Primary Tumor	Primary Tumor	Primary Tumor	Primary Tumor	Primary Tumor	Primary Tumor	Primary Tumor	Primary Tumor	Primary Tumor	Primary Tumor	Primary Tumor	Primary Tumor	Primary Tumor	Primary Tumor	Primary Tumor	Primary Tumor	Primary Tumor	Primary Tumor	Primary Tumor	Primary Tumor	Primary Tumor	Primary Tumor	Primary Tumor	Primary Tumor	Primary Tumor	Primary Tumor	Primary Tumor
All cell lines	BI-2536	NPK33-1-98-1	PLK1, PLK2, PLK3	SpearmanRankCoef	1	-0.12137	-0.094855	-0.094855	-0.11247	-0.027907	-0.12334	-0.12008	-0.14373	-0.11417	-0.12011	-0.10565	-0.13322	-0.094984	-0.14442	-0.079873	-0.063842	-0.10565	-0.13319	-0.12919	-0.11951	-0.094855	-0.047415	-0.070363	-0.1337	-0.12294	-0.11106	-0.10565	-0.094855	-0.066605	-0.094984	-0.14442	-0.12608	-0.10565	-0.13389	-0.10886	-0.12378	-0.11089	-0.11951	-0.12234	-0.10375	-0.1346	-0.15473	-0.10886	-0.12608
All cell lines	BI-2536	NPK33-1-98-1	PLK1, PLK2, PLK3	P-value	1	0.015145	0.058033	0.058033	0.024486	0.57787	0.013568	0.016273	0.0039683	0.022386	0.016246	0.034658	0.0076294	0.057693	0.0037959	0.11071	0.20261	0.034658	0.0076462	0.009696	0.016791	0.058033	0.34422	0.16014	0.0074135	0.013877	0.026346	0.034658	0.058033	0.18372	0.057693	0.0037959	0.011612	0.034658	0.0073281	0.029486	0.013233	0.026577	0.016791	0.014355	0.038074	0.0070229	0.001912	0.029486	0.011612
All cell lines	Vinorelbine	Navelbine	Microtubules	SpearmanRankCoef	8	-0.074509	-0.058021	-0.058021	-0.074184	-0.025864	-0.056212	-0.058284	-0.0832	-0.064787	-0.080531	-0.068026	-0.070151	-0.056305	-0.082352	-0.062116	-0.039763	-0.068026	-0.12125	-0.084347	-0.076895	-0.057066	-0.038722	-0.045986	-0.090818	-0.088758	-0.065261	-0.068026	-0.057066	-0.047086	-0.056305	-0.083265	-0.089973	-0.068965	-0.076195	-0.067002	-0.087526	-0.057525	-0.077822	-0.058822	-0.062612	-0.07844	-0.093773	-0.066062	-0.089973
All cell lines	Vinorelbine	Navelbine	Microtubules	P-value	8	0.026656	0.084516	0.084516	0.027326	0.44221	0.09468	0.083114	0.01329	0.054022	0.016565	0.043055	0.036929	0.094137	0.014263	0.064738	0.23733	0.043055	0.00030007	0.012068	0.022154	0.089766	0.24984	0.17168	0.0068613	0.008243	0.052287	0.043055	0.089766	0.16164	0.094137	0.013218	0.0074004	0.040249	0.023402	0.046298	0.0091837	0.087208	0.020594	0.080304	0.062627	0.019606	0.0052406	0.049455	0.0074004
All cell lines	QS11		ARFGAP	SpearmanRankCoef	28	-0.098069	-0.096717	-0.096717	-0.094916	-0.051991	-0.080194	-0.084817	-0.085916	-0.053902	-0.065977	-0.10374	-0.097013	-0.091099	-0.089945	-0.081197	-0.05851	-0.10374	-0.10557	-0.094217	-0.11042	-0.092555	-0.06694	-0.092515	-0.08563	-0.07745	-0.052463	-0.10374	-0.092555	-0.066278	-0.091099	-0.093969	-0.089488	-0.10787	-0.080074	-0.10346	-0.066227	-0.068092	-0.11451	-0.085439	-0.079333	-0.081729	-0.10488	-0.099334	-0.089488
All cell lines	QS11		ARFGAP	P-value	28	0.0036871	0.0041893	0.0041893	0.0049542	0.12435	0.017663	0.012078	0.011006	0.11109	0.05106	0.0021217	0.0040742	0.0070073	0.0077632	0.016289	0.083675	0.0021217	0.0017656	0.0052838	0.0010695	0.0061482	0.047759	0.0061705	0.011277	0.021954	0.12097	0.0021217	0.0061482	0.050011	0.0070073	0.0054054	0.0080822	0.0013955	0.017834	0.0021825	0.050187	0.044046	0.00068983	0.011461	0.018922	0.015599	0.0018939	0.003267	0.0080822
All cell lines	PF-562271		FAK	SpearmanRankCoef	31	-0.085465	-0.079047	-0.079047	-0.077677	-0.035661	-0.099121	-0.090631	-0.094056	-0.058002	-0.058267	-0.080647	-0.09992	-0.070194	-0.095832	-0.056093	-0.040242	-0.080647	-0.10914	-0.11014	-0.092457	-0.076933	-0.0646	-0.067635	-0.098218	-0.076078	-0.055689	-0.080647	-0.076933	-0.086931	-0.070194	-0.09787	-0.097443	-0.082747	-0.098453	-0.090908	-0.07629	-0.072879	-0.094531	-0.096345	-0.066492	-0.08193	-0.10148	-0.08882	-0.097443
All cell lines	PF-562271		FAK	P-value	31	0.011869	0.019994	0.019994	0.022253	0.29453	0.0035014	0.0076141	0.0056052	0.088036	0.086595	0.01761	0.0032447	0.038902	0.0047644	0.099019	0.23681	0.01761	0.0012968	0.0011694	0.006475	0.023571	0.057395	0.046616	0.0038137	0.025166	0.10148	0.01761	0.023571	0.010487	0.038902	0.0039409	0.0041016	0.014862	0.0037301	0.0074306	0.024763	0.031999	0.005368	0.0045433	0.050458	0.015883	0.0027922	0.0089179	0.0041016
All cell lines	OSU-03012		PDPK1 (PDK1)	SpearmanRankCoef	474	-0.11281	-0.11073	-0.11073	-0.11055	-0.045486	-0.10205	-0.10103	-0.1115	-0.087426	-0.089094	-0.11722	-0.10706	-0.10387	-0.12142	-0.090149	-0.0834	-0.11722	-0.12716	-0.11826	-0.12416	-0.11124	-0.072166	-0.098601	-0.11166	-0.10253	-0.090434	-0.11722	-0.11124	-0.074034	-0.10387	-0.12096	-0.11241	-0.11672	-0.10799	-0.11772	-0.094801	-0.086186	-0.12365	-0.10091	-0.096039	-0.10809	-0.12686	-0.11822	-0.11241
All cell lines	OSU-03012		PDPK1 (PDK1)	P-value	474	0.00083461	0.0010423	0.0010423	0.0010619	0.17911	0.0025229	0.0027883	0.00096051	0.009713	0.0084037	0.00051553	0.001527	0.0021068	0.00032085	0.007659	0.013649	0.00051553	0.00016379	0.00045923	0.0002337	0.00098754	0.032908	0.0035235	0.00094408	0.0024074	0.0074682	0.00051553	0.00098754	0.028627	0.0021068	0.00033839	0.00087172	0.00054541	0.0013877	0.00048791	0.0050324	0.010801	0.00024788	0.0028216	0.0044865	0.0013727	0.0001697	0.00046107	0.00087172
All cell lines	PAC-1		CASP3 agonist	SpearmanRankCoef	94	-0.09664	-0.094256	-0.094256	-0.092385	-0.046426	-0.072868	-0.081537	-0.077471	-0.056151	-0.082858	-0.10991	-0.084895	-0.10269	-0.091399	-0.056709	-0.050052	-0.10991	-0.10201	-0.099786	-0.11565	-0.095769	-0.064396	-0.089612	-0.084498	-0.08202	-0.054261	-0.10991	-0.095769	-0.057969	-0.10269	-0.08998	-0.099012	-0.1084	-0.079597	-0.10013	-0.078188	-0.050897	-0.11415	-0.070062	-0.086049	-0.075667	-0.10375	-0.10163	-0.099012
All cell lines	PAC-1		CASP3 agonist	P-value	94	0.00449	0.0055868	0.0055868	0.0066104	0.17301	0.032324	0.016583	0.022848	0.099263	0.014902	0.0012208	0.012601	0.0025257	0.0072153	0.095943	0.14179	0.0012208	0.0026977	0.003341	0.00066448	0.0048657	0.05863	0.0084381	0.013023	0.01595	0.11119	0.0012208	0.0048657	0.088773	0.0025257	0.008172	0.0035957	0.001427	0.019355	0.0032336	0.021613	0.13518	0.00078123	0.039616	0.011443	0.026227	0.0022749	0.0027992	0.0035957
All cell lines	GSK-650394		SGK3	SpearmanRankCoef	12	-0.092152	-0.088531	-0.088531	-0.089985	-0.05453	-0.0908	-0.10063	-0.099029	-0.079036	-0.083246	-0.10027	-0.099289	-0.092309	-0.097635	-0.06965	-0.049654	-0.10027	-0.11497	-0.097746	-0.10341	-0.087724	-0.065507	-0.079132	-0.097205	-0.095785	-0.077763	-0.10027	-0.087724	-0.066705	-0.092309	-0.098426	-0.097387	-0.10106	-0.089654	-0.091767	-0.090711	-0.085824	-0.1042	-0.086337	-0.076532	-0.094591	-0.11058	-0.090965	-0.097387
All cell lines	GSK-650394		SGK3	P-value	12	0.0066536	0.0091436	0.0091436	0.0080579	0.1088	0.0075015	0.0030324	0.0035321	0.02001	0.014267	0.0031392	0.0034458	0.0065608	0.0040288	0.040443	0.14429	0.0031392	0.00069967	0.003987	0.0023121	0.0098004	0.053978	0.019861	0.0041941	0.0047848	0.022104	0.0031392	0.0098004	0.049722	0.0065608	0.0037395	0.0041232	0.0029089	0.0082946	0.0068862	0.0075604	0.011516	0.0021389	0.011029	0.024309	0.005339	0.0011163	0.007393	0.0041232
All cell lines	5-Fluorouracil		DNA antimetabolite	SpearmanRankCoef	5	-0.086344	-0.092671	-0.092671	-0.078462	-0.048855	-0.073778	-0.075965	-0.085181	-0.063976	-0.066908	-0.094961	-0.067879	-0.089947	-0.083947	-0.066666	-0.069377	-0.094961	-0.082857	-0.095884	-0.095709	-0.092123	-0.06001	-0.10538	-0.086062	-0.078131	-0.075179	-0.094961	-0.092123	-0.062799	-0.089947	-0.084505	-0.08622	-0.095506	-0.077458	-0.093416	-0.070229	-0.046408	-0.096254	-0.064845	-0.069521	-0.080186	-0.08742	-0.092868	-0.08622
All cell lines	5-Fluorouracil		DNA antimetabolite	P-value	5	0.0089345	0.0050015	0.0050015	0.017544	0.13955	0.025554	0.021488	0.0099023	0.052917	0.042917	0.0040197	0.03998	0.0064478	0.011031	0.043679	0.035783	0.0040197	0.012121	0.0036761	0.0037389	0.0052664	0.069466	0.0014037	0.009161	0.018028	0.022879	0.0040197	0.0052664	0.057443	0.0064478	0.010508	0.009033	0.0038134	0.019046	0.0046606	0.033567	0.1605	0.0035457	0.049767	0.035399	0.015204	0.0081142	0.004909	0.009033
All cell lines	Thapsigargin		sarco-endoplasmic reticulum Ca2+-ATPases	SpearmanRankCoef	2	-0.06334	-0.049939	-0.049939	-0.059506	-0.01765	-0.070317	-0.067995	-0.074324	-0.048678	-0.069987	-0.056398	-0.073924	-0.053325	-0.063571	-0.023567	-0.03609	-0.056398	-0.11267	-0.057655	-0.067084	-0.047872	-0.035992	-0.035716	-0.063893	-0.057351	-0.054433	-0.056398	-0.047872	-0.047447	-0.053325	-0.065557	-0.060346	-0.058444	-0.052401	-0.060721	-0.064734	-0.050543	-0.069105	-0.065259	-0.050285	-0.057098	-0.073752	-0.058681	-0.060346
All cell lines	Thapsigargin		sarco-endoplasmic reticulum Ca2+-ATPases	P-value	2	0.063359	0.14339	0.14339	0.081149	0.60523	0.03924	0.046217	0.029298	0.15378	0.040175	0.098365	0.030182	0.11814	0.062399	0.49006	0.29044	0.098365	0.00093323	0.09108	0.049226	0.16072	0.29174	0.29547	0.061084	0.092803	0.11068	0.098365	0.16072	0.16447	0.11814	0.054633	0.07694	0.086731	0.12466	0.075117	0.057747	0.1386	0.042762	0.055744	0.14063	0.094256	0.03057	0.085459	0.07694
All cell lines	GSK-1904529A		IGF1R	SpearmanRankCoef	89	-0.10362	-0.092172	-0.092172	-0.097048	-0.073053	-0.094573	-0.091599	-0.095458	-0.074198	-0.077807	-0.099726	-0.093668	-0.085894	-0.10217	-0.079395	-0.067645	-0.099726	-0.11334	-0.11091	-0.10911	-0.093141	-0.07874	-0.089891	-0.096039	-0.091666	-0.080748	-0.099726	-0.093141	-0.10045	-0.085894	-0.10126	-0.11293	-0.098761	-0.10406	-0.10164	-0.087393	-0.072654	-0.10815	-0.086902	-0.082008	-0.085511	-0.10772	-0.1026	-0.11293
All cell lines	GSK-1904529A		IGF1R	P-value	89	0.0021479	0.0063643	0.0063643	0.0040607	0.030716	0.0051134	0.0067009	0.0047116	0.028185	0.021349	0.0031462	0.0055565	0.011027	0.0024784	0.01883	0.045456	0.0031462	0.00078315	0.0010156	0.0012272	0.0058299	0.019835	0.0078004	0.0044636	0.0066608	0.016892	0.0031462	0.0058299	0.0029323	0.011027	0.0027097	0.00081893	0.0034517	0.0020559	0.0026123	0.0096988	0.031643	0.0013561	0.010117	0.015247	0.011391	0.0014172	0.0023757	0.00081893
All cell lines	Tipifarnib	Zarnestra,IND58359,R115777	Farnesyl-transferase (FNTA)	SpearmanRankCoef	12	-0.093275	-0.079215	-0.079215	-0.088698	-0.04043	-0.083514	-0.081023	-0.088225	-0.059268	-0.077226	-0.091143	-0.090298	-0.078299	-0.10095	-0.0687	-0.038309	-0.091143	-0.098599	-0.096826	-0.1047	-0.079843	-0.053982	-0.081038	-0.089594	-0.0777	-0.065287	-0.091143	-0.079843	-0.06049	-0.078299	-0.10035	-0.097337	-0.09051	-0.082401	-0.092915	-0.08223	-0.05932	-0.10406	-0.078637	-0.076572	-0.074504	-0.11126	-0.093547	-0.097337
All cell lines	Tipifarnib	Zarnestra,IND58359,R115777	Farnesyl-transferase (FNTA)	P-value	12	0.0058154	0.01924	0.01924	0.0087379	0.23274	0.013575	0.016644	0.0091043	0.080087	0.022496	0.0070451	0.0075936	0.020683	0.0028256	0.042423	0.25818	0.0070451	0.0035434	0.00419	0.0019517	0.018301	0.11097	0.016625	0.0080791	0.021679	0.053816	0.0070451	0.018301	0.074041	0.020683	0.0029938	0.0039931	0.0074523	0.014879	0.0060083	0.015088	0.079818	0.00208	0.02014	0.023666	0.027719	0.00099169	0.005673	0.0039931
All cell lines	AS601245		JNK	SpearmanRankCoef	1	-0.073572	-0.068996	-0.068996	-0.076976	-0.056749	-0.080191	-0.084199	-0.056412	-0.042151	-0.049754	-0.080076	-0.097555	-0.073733	-0.07155	-0.074691	-0.037593	-0.080076	-0.097909	-0.070269	-0.088502	-0.067748	-0.043453	-0.053352	-0.062719	-0.059057	-0.046917	-0.080076	-0.067748	-0.050324	-0.073733	-0.072764	-0.072031	-0.081305	-0.057889	-0.07754	-0.058697	-0.069824	-0.089717	-0.084955	-0.066388	-0.054098	-0.0847	-0.076309	-0.072031
All cell lines	AS601245		JNK	P-value	1	0.029827	0.041657	0.041657	0.023015	0.093989	0.017863	0.012875	0.09596	0.2137	0.1421	0.018029	0.0039328	0.02947	0.034642	0.027417	0.26747	0.018029	0.0038033	0.038024	0.0089275	0.045499	0.19987	0.11541	0.064135	0.081343	0.16629	0.018029	0.045499	0.13758	0.02947	0.031677	0.033439	0.01633	0.087557	0.022027	0.083221	0.039262	0.0080288	0.012086	0.050022	0.11041	0.012347	0.024233	0.033439
All cell lines	NPK76-II-72-1		PLK3	SpearmanRankCoef	1	-0.076673	-0.0847	-0.0847	-0.071602	-0.023333	-0.054747	-0.054926	-0.08024	-0.055543	-0.061944	-0.08795	-0.054115	-0.07718	-0.076654	-0.048812	-0.046942	-0.08795	-0.085435	-0.087488	-0.091257	-0.084392	-0.054008	-0.090377	-0.078853	-0.070035	-0.057895	-0.08795	-0.084392	-0.047378	-0.07718	-0.076978	-0.078307	-0.088255	-0.070112	-0.088027	-0.061216	-0.03163	-0.091561	-0.050265	-0.05914	-0.075022	-0.08057	-0.087721	-0.078307
All cell lines	NPK76-II-72-1		PLK3	P-value	1	0.019891	0.010082	0.010082	0.029705	0.47918	0.096644	0.095553	0.014807	0.091884	0.060089	0.0075378	0.10056	0.019086	0.019922	0.1386	0.15438	0.0075378	0.009448	0.0078604	0.0055542	0.010358	0.10124	0.0060299	0.016629	0.033478	0.078913	0.0075378	0.010358	0.15058	0.019086	0.019403	0.017398	0.0073315	0.033285	0.0074848	0.063167	0.33737	0.0053978	0.12722	0.072673	0.02272	0.0144	0.0076958	0.017398
All cell lines	Methotrexate	Methotrexate	Dihydrofolate reductase (DHFR)	SpearmanRankCoef	1	-0.079195	-0.088196	-0.088196	-0.07264	-0.0451	-0.065545	-0.07889	-0.064031	-0.042983	-0.054226	-0.095501	-0.069684	-0.087481	-0.061859	-0.048428	-0.092423	-0.095501	-0.086465	-0.077515	-0.091247	-0.086986	-0.074691	-0.084452	-0.073258	-0.07262	-0.059545	-0.095501	-0.086986	-0.070605	-0.087481	-0.063067	-0.070181	-0.096695	-0.054199	-0.083935	-0.052289	-0.054804	-0.092441	-0.060717	-0.058479	-0.066417	-0.071613	-0.082726	-0.070181
All cell lines	Methotrexate	Methotrexate	Dihydrofolate reductase (DHFR)	P-value	1	0.021011	0.010139	0.010139	0.034324	0.18924	0.056253	0.021513	0.0622	0.21088	0.11437	0.0053539	0.042367	0.010769	0.071625	0.15859	0.0070435	0.0053539	0.011722	0.023904	0.0078059	0.011224	0.029544	0.013836	0.032819	0.034376	0.082923	0.0053539	0.011224	0.039706	0.010769	0.066248	0.040912	0.0048034	0.11455	0.01443	0.12791	0.11056	0.007032	0.077034	0.088591	0.053048	0.036958	0.015908	0.040912
All cell lines	XMD11-85h		BRSK2, FLT4, MARK4, PRKCD, RET, SPRK1	SpearmanRankCoef	23	-0.11428	-0.12682	-0.12682	-0.1148	-0.082079	-0.089299	-0.097421	-0.13132	-0.094142	-0.095663	-0.13618	-0.096099	-0.11719	-0.12484	-0.076391	-0.091446	-0.13618	-0.14317	-0.13074	-0.13689	-0.12738	-0.11253	-0.14016	-0.13546	-0.132	-0.096113	-0.13618	-0.12738	-0.074464	-0.11719	-0.12437	-0.12211	-0.13562	-0.10811	-0.1276	-0.10641	-0.072893	-0.13635	-0.086961	-0.091418	-0.13474	-0.13304	-0.12814	-0.12211
All cell lines	XMD11-85h		BRSK2, FLT4, MARK4, PRKCD, RET, SPRK1	P-value	23	0.010784	0.0046329	0.0046329	0.010428	0.067503	0.046617	0.029889	0.0033573	0.035893	0.032992	0.0023464	0.032198	0.0089204	0.005319	0.088901	0.041571	0.0023464	0.0013729	0.0035008	0.0022238	0.0044534	0.012063	0.0017346	0.002476	0.0031968	0.032173	0.0023464	0.0044534	0.097281	0.0089204	0.0054963	0.00642	0.0024476	0.015907	0.0043829	0.017638	0.10457	0.0023162	0.05269	0.041634	0.0026116	0.0029618	0.004219	0.00642
All cell lines	(5Z)-7-Oxozeaenol		MAP3K7 (TAK1)	SpearmanRankCoef	14	0.058025	0.060071	0.060071	0.065203	0.04884	0.051421	0.059174	0.083564	0.0961	0.10913	0.065093	0.060596	0.080675	0.078936	0.060389	0.051111	0.065093	0.072636	0.078375	0.062729	0.060071	0.042197	0.050203	0.090234	0.093233	0.099895	0.065093	0.060071	0.030533	0.080675	0.078936	0.081275	0.065093	0.073938	0.057706	0.10813	0.065251	0.062729	0.055442	0.080696	0.086782	0.083782	0.057706	0.081275
All cell lines	(5Z)-7-Oxozeaenol		MAP3K7 (TAK1)	P-value	14	0.079217	0.069183	0.069183	0.048516	0.13967	0.1199	0.073448	0.011403	0.0035996	0.00093898	0.048899	0.06678	0.014593	0.016871	0.067719	0.12215	0.048899	0.027929	0.01767	0.057722	0.069183	0.20197	0.12894	0.0062797	0.0047421	0.0024714	0.048899	0.069183	0.35598	0.014593	0.016871	0.013873	0.048899	0.025236	0.080886	0.0010464	0.048353	0.057722	0.093549	0.014567	0.0085921	0.011191	0.080886	0.013873
All cell lines	XAV 939		TNKS1 (tankyrase-1)	SpearmanRankCoef	3	0.042798	0.06077	0.06077	0.036669	0.086004	0.082229	0.091059	0.04297	0.058888	0.0349	0.053458	0.073698	0.072351	0.046671	0.035474	0.035236	0.053458	0.019586	0.04958	0.039589	0.059232	0.090682	0.052727	0.041296	0.040692	0.04486	0.053458	0.059232	0.083675	0.072351	0.048168	0.036418	0.054991	0.039823	0.046697	0.045587	0.083311	0.041124	0.080049	0.058743	0.054996	0.04285	0.045158	0.036418
All cell lines	XAV 939		TNKS1 (tankyrase-1)	P-value	3	0.19488	0.065559	0.065559	0.26679	0.0090944	0.012646	0.0057372	0.1931	0.074375	0.29057	0.10534	0.025472	0.028292	0.15746	0.2827	0.28594	0.10534	0.55318	0.13312	0.23053	0.072692	0.0059423	0.11019	0.21103	0.21779	0.17422	0.10534	0.072692	0.011162	0.028292	0.14455	0.27008	0.095706	0.22779	0.15722	0.16734	0.01152	0.21294	0.015213	0.075091	0.095674	0.19434	0.17138	0.27008
All cell lines	Trametinib	Mekinist	MAP2K1 (MEK1), MAP2K2 (MEK2)	SpearmanRankCoef	28	0.072323	0.077167	0.077167	0.076521	0.067382	0.029938	0.056215	0.078423	0.092938	0.10112	0.088716	0.049011	0.090835	0.067389	0.061856	0.045839	0.088716	0.08781	0.074759	0.075211	0.077167	0.064318	0.065736	0.089612	0.10922	0.094735	0.088716	0.077167	0.043524	0.090835	0.067389	0.083539	0.088716	0.06073	0.063627	0.10227	0.067357	0.075211	0.036671	0.084316	0.093911	0.078699	0.063627	0.083539
All cell lines	Trametinib	Mekinist	MAP2K1 (MEK1), MAP2K2 (MEK2)	P-value	28	0.030413	0.020884	0.020884	0.021981	0.043755	0.37074	0.09263	0.018885	0.0053679	0.0024416	0.0078819	0.14268	0.0065119	0.043731	0.064208	0.1704	0.0078819	0.0085425	0.025234	0.024363	0.020884	0.054286	0.049176	0.0072739	0.0010588	0.0045375	0.0078819	0.020884	0.19305	0.0065119	0.043731	0.012368	0.0078819	0.069219	0.056934	0.0021758	0.043834	0.024363	0.27285	0.011576	0.0049026	0.018469	0.056934	0.012368
BRCA	MG-132		Proteasome	SpearmanRankCoef	599	-0.69105	-0.85934	-0.85934	-0.69105	-0.72111	-0.72111	-0.72111	-0.85934	-0.69105	-0.69105	-0.85934	-0.72111	-0.85934	-0.85934	-0.69105	-0.50128	-0.85934	-0.69105	-0.85934	-0.85934	-0.85934	-0.72111	-0.86824	-0.85934	-0.69105	-0.69105	-0.85934	-0.85934	-0.72111	-0.85934	-0.85934	-0.69105	-0.85934	-0.69105	-0.85934	-0.69105	-0.53709	-0.85934	-0.72111	-0.69105	-0.85934	-0.85934	-0.85934	-0.69105
BRCA	MG-132		Proteasome	P-value	599	0.0062024	8.2019e-05	8.2019e-05	0.0062024	0.003609	0.003609	0.003609	8.2019e-05	0.0062024	0.0062024	8.2019e-05	0.003609	8.2019e-05	8.2019e-05	0.0062024	0.067836	8.2019e-05	0.0062024	8.2019e-05	8.2019e-05	8.2019e-05	0.003609	5.6525e-05	8.2019e-05	0.0062024	0.0062024	8.2019e-05	8.2019e-05	0.003609	8.2019e-05	8.2019e-05	0.0062024	8.2019e-05	0.0062024	8.2019e-05	0.0062024	0.047652	8.2019e-05	0.003609	0.0062024	8.2019e-05	8.2019e-05	8.2019e-05	0.0062024
# Essential metabolic genes						50	39	39	48	23	40	34	53	48	57	39	41	42	50	47	52	39	60	50	46	38	24	43	51	46	52	39	38	34	42	51	52	40	50	46	55	35	47	40	51	45	52	45	52
# Mutated cell lines						321	283	283	313	175	252	250	349	355	376	290	255	304	331	281	370	290	376	325	300	282	206	305	339	348	378	290	282	246	304	332	343	291	331	293	367	259	301	247	326	335	340	292	343
# Mutated BRCA cell lines						20	17	17	19	13	17	17	19	21	21	17	16	18	18	19	22	17	21	18	17	17	13	19	18	20	21	17	17	16	18	18	20	17	20	17	21	18	17	16	20	18	18	17	20
[truncated: 1,112 more columns]
