# Supplementary figures and images for: Identifying personalized metabolic signatures in breast cancer
Source: Preprints.org preprint supplement (doi:10.20944/preprints202011.0474.v1), 2020-11-18

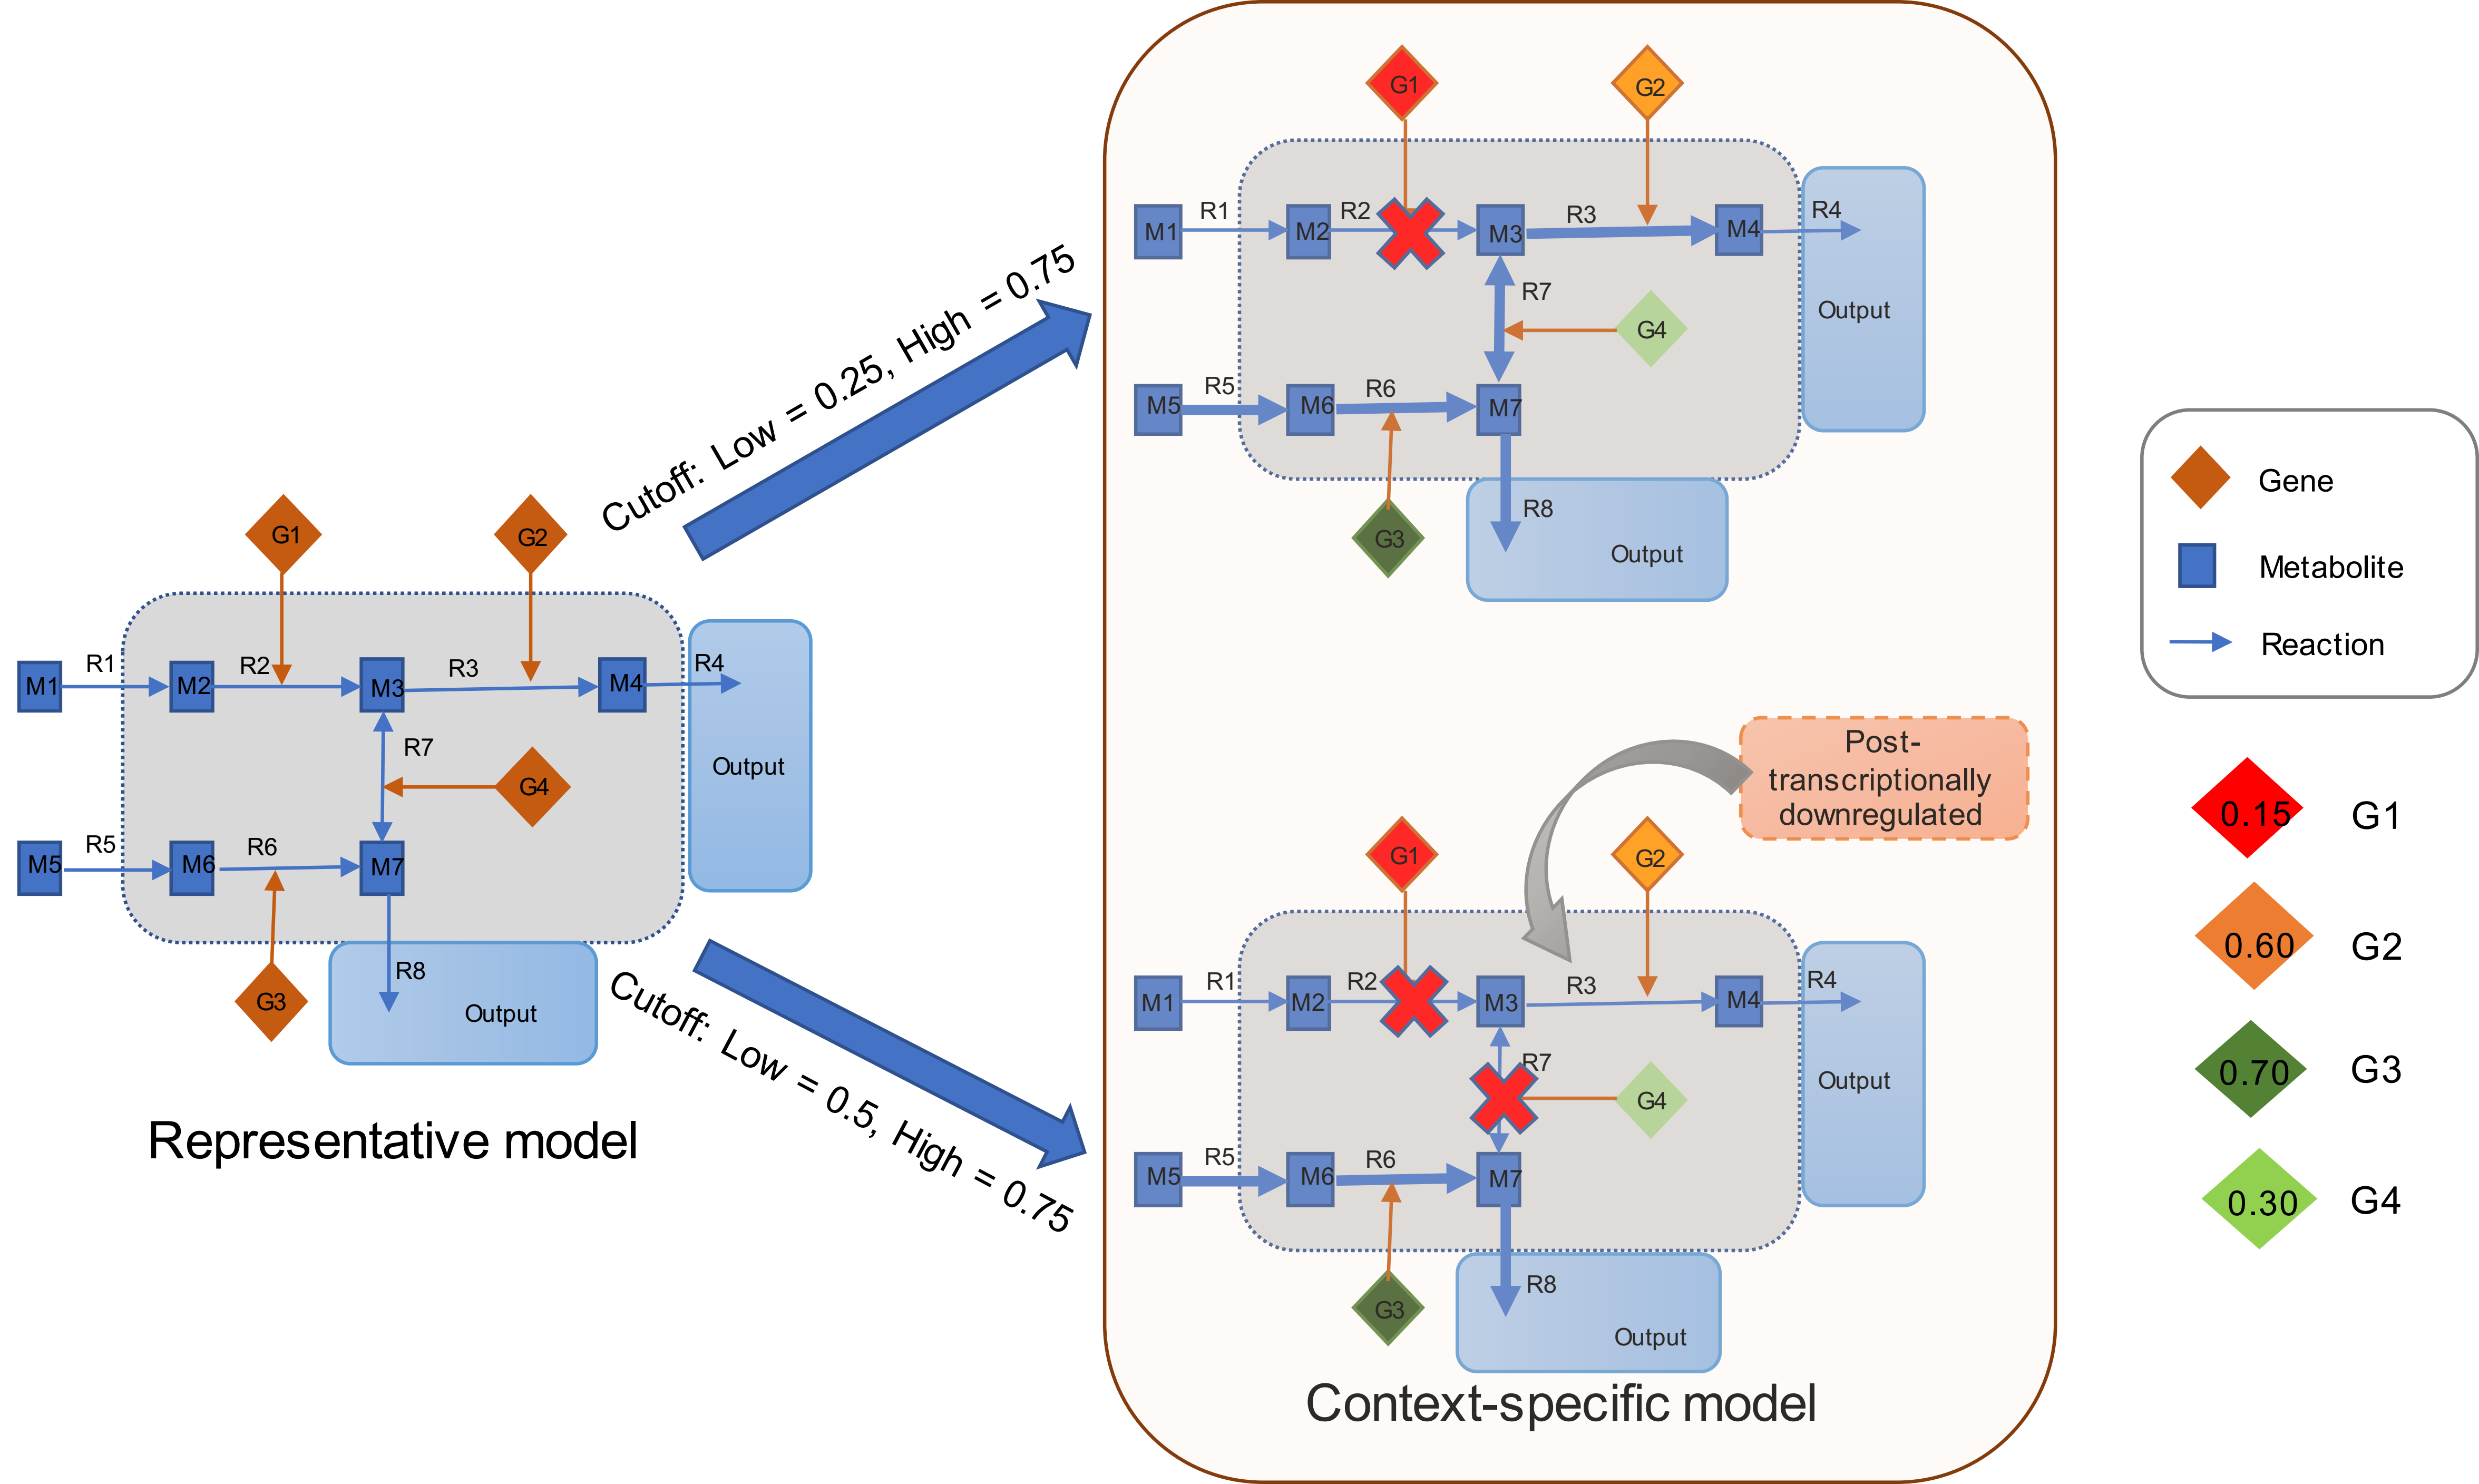

Supplement: Supplementary file 3 [file supplementary]

Optimal number of clusters

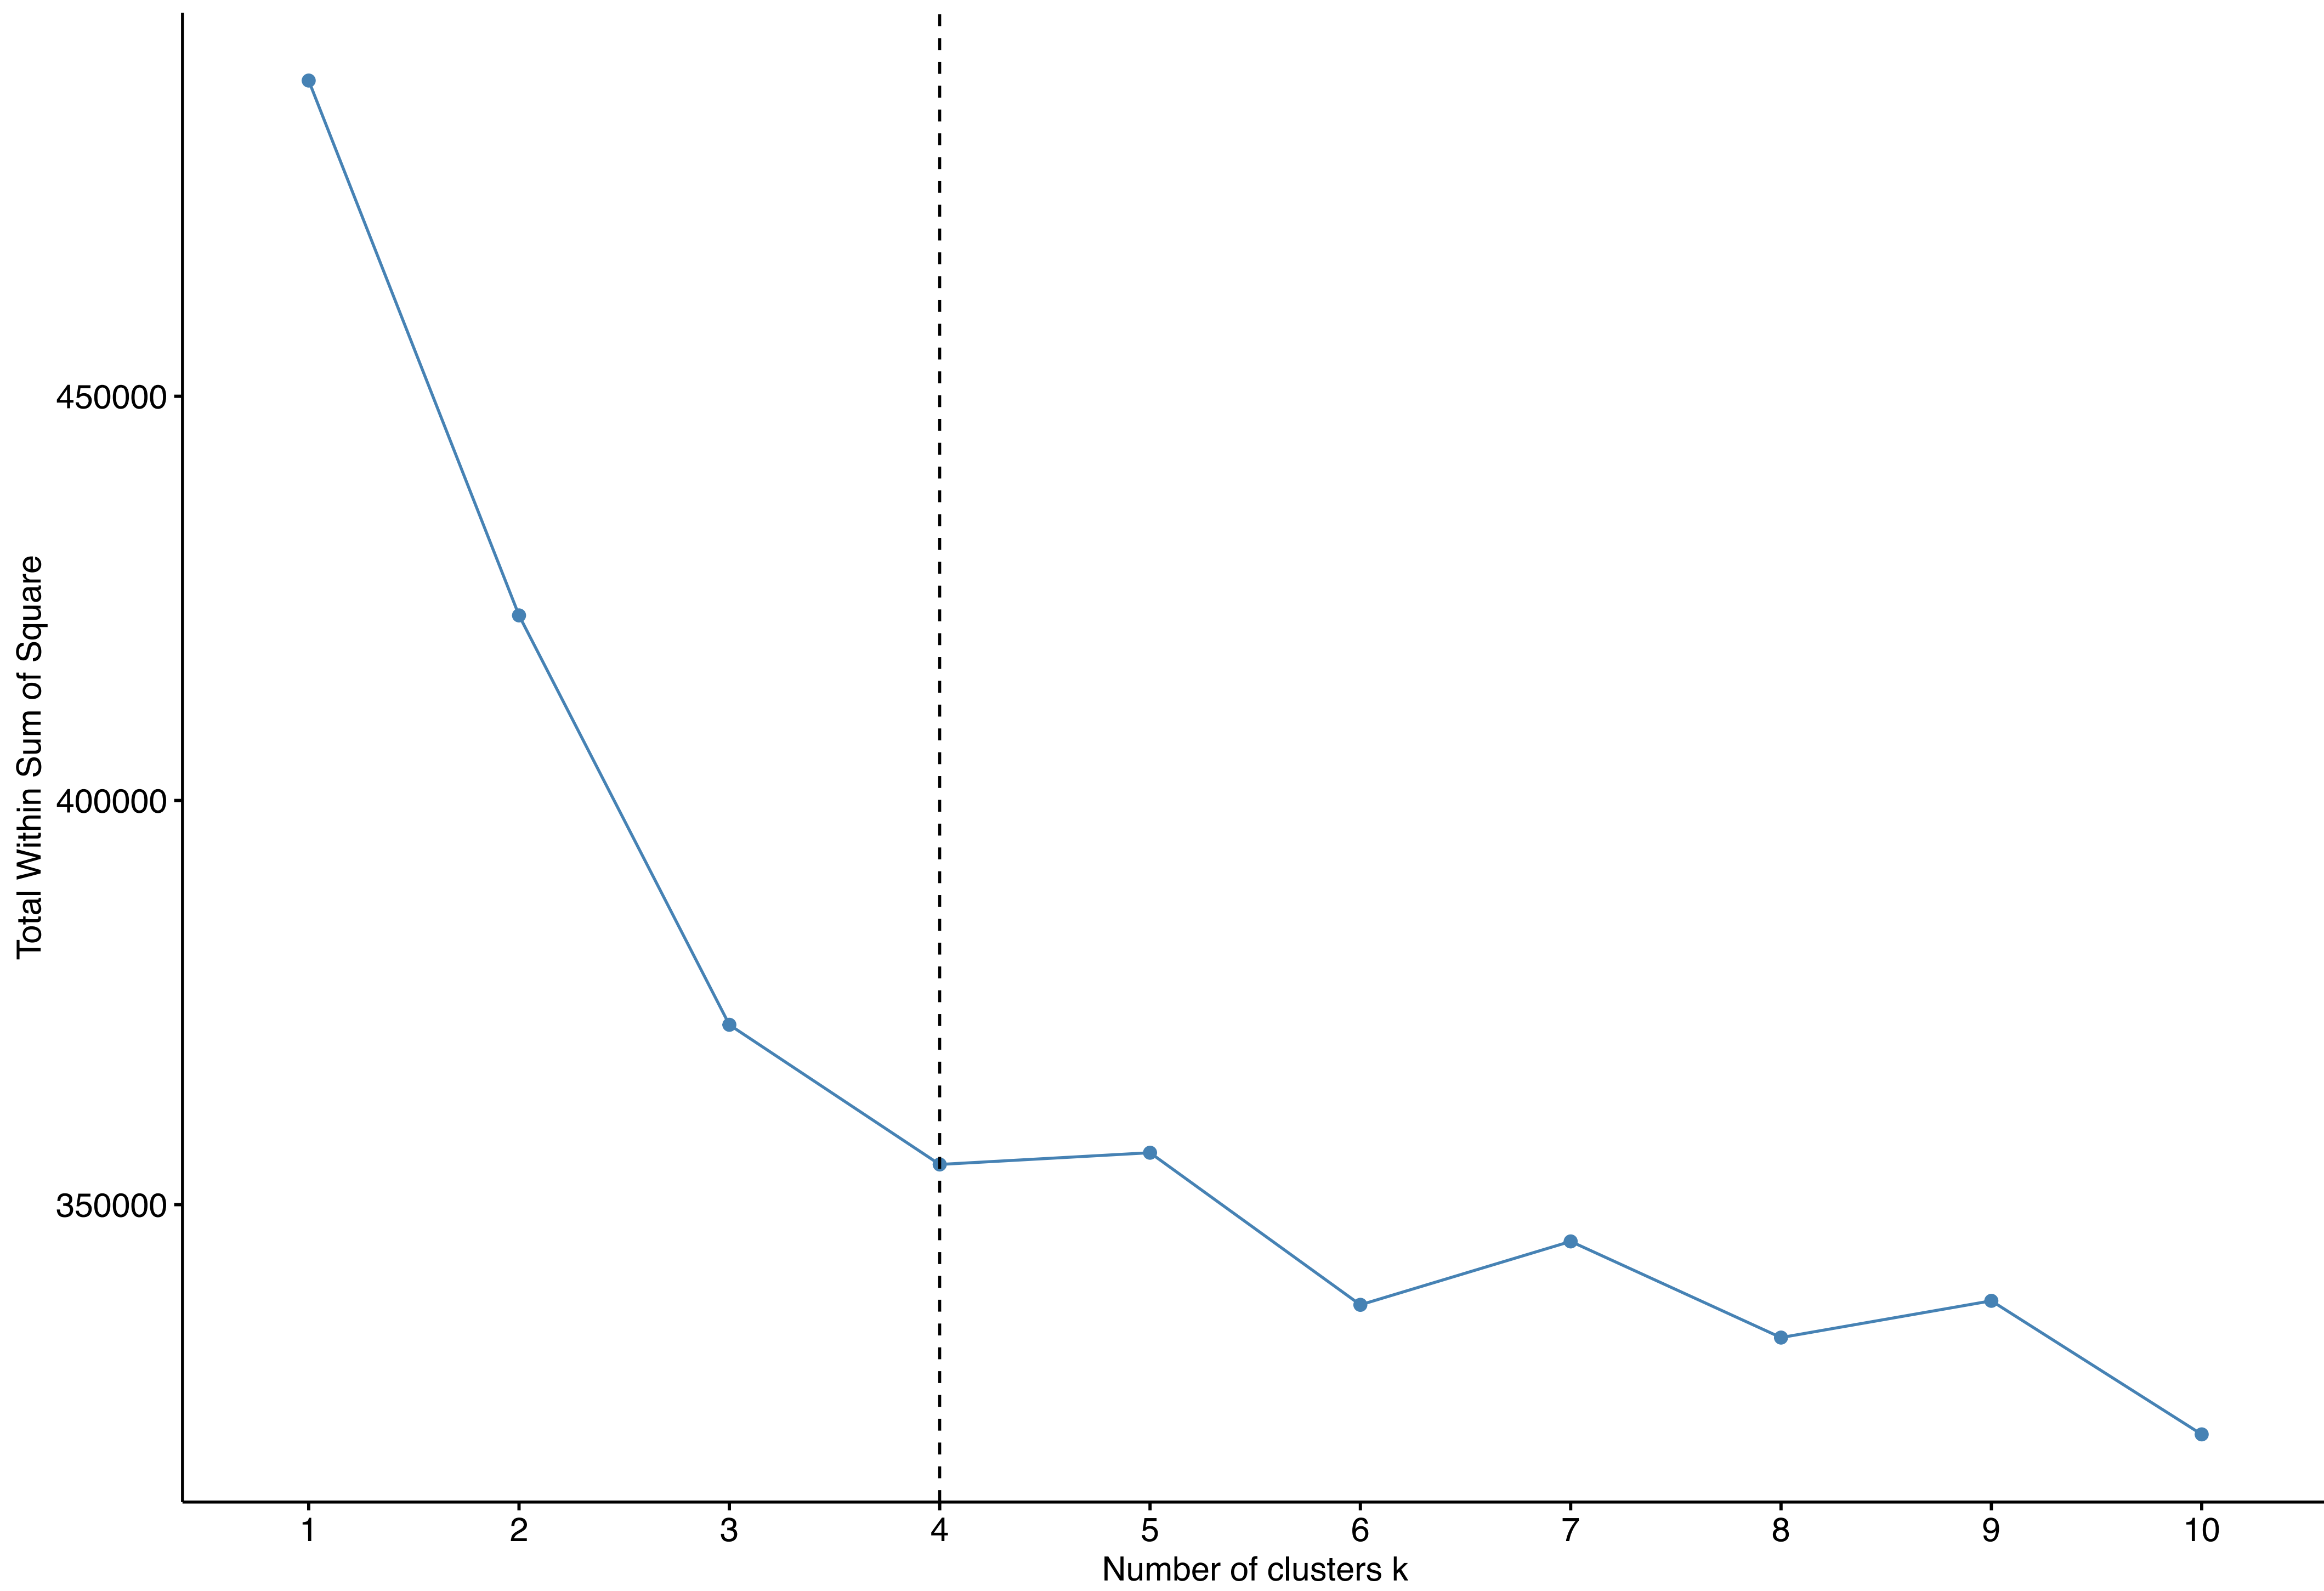

Supplement: Supplementary file 5 [file supplementary]

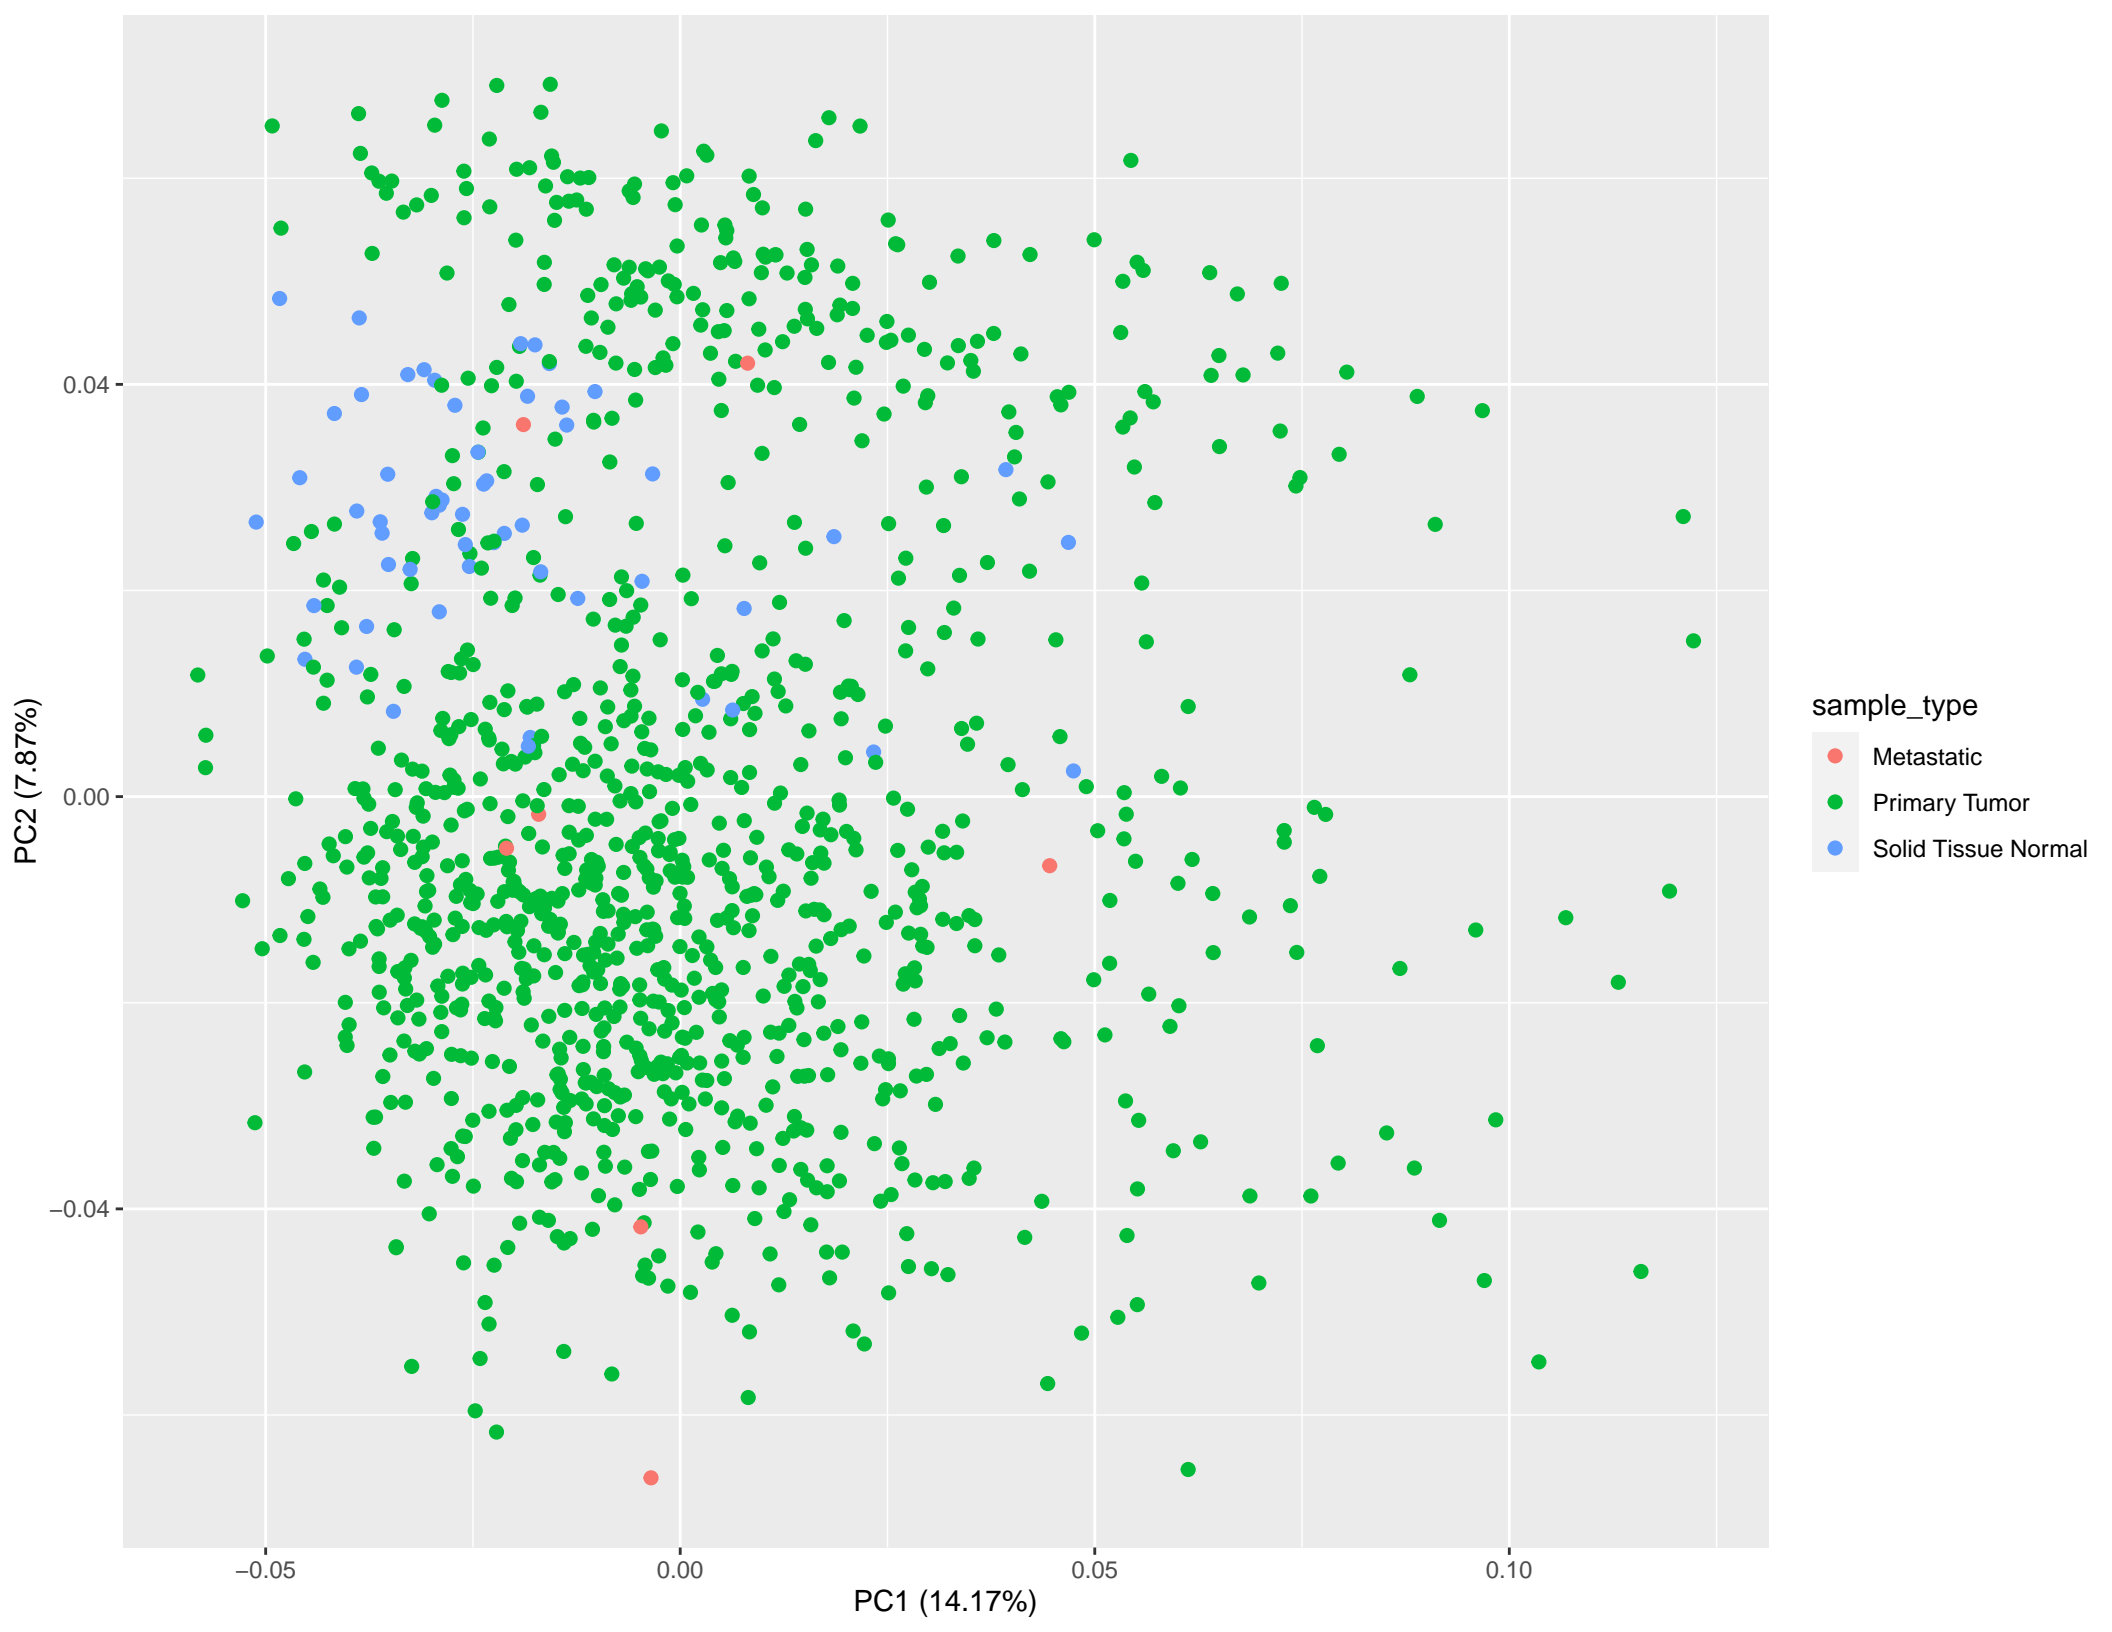

Supplement: Supplementary file 6 [file supplementary]

# Cluster 1 vs Normal

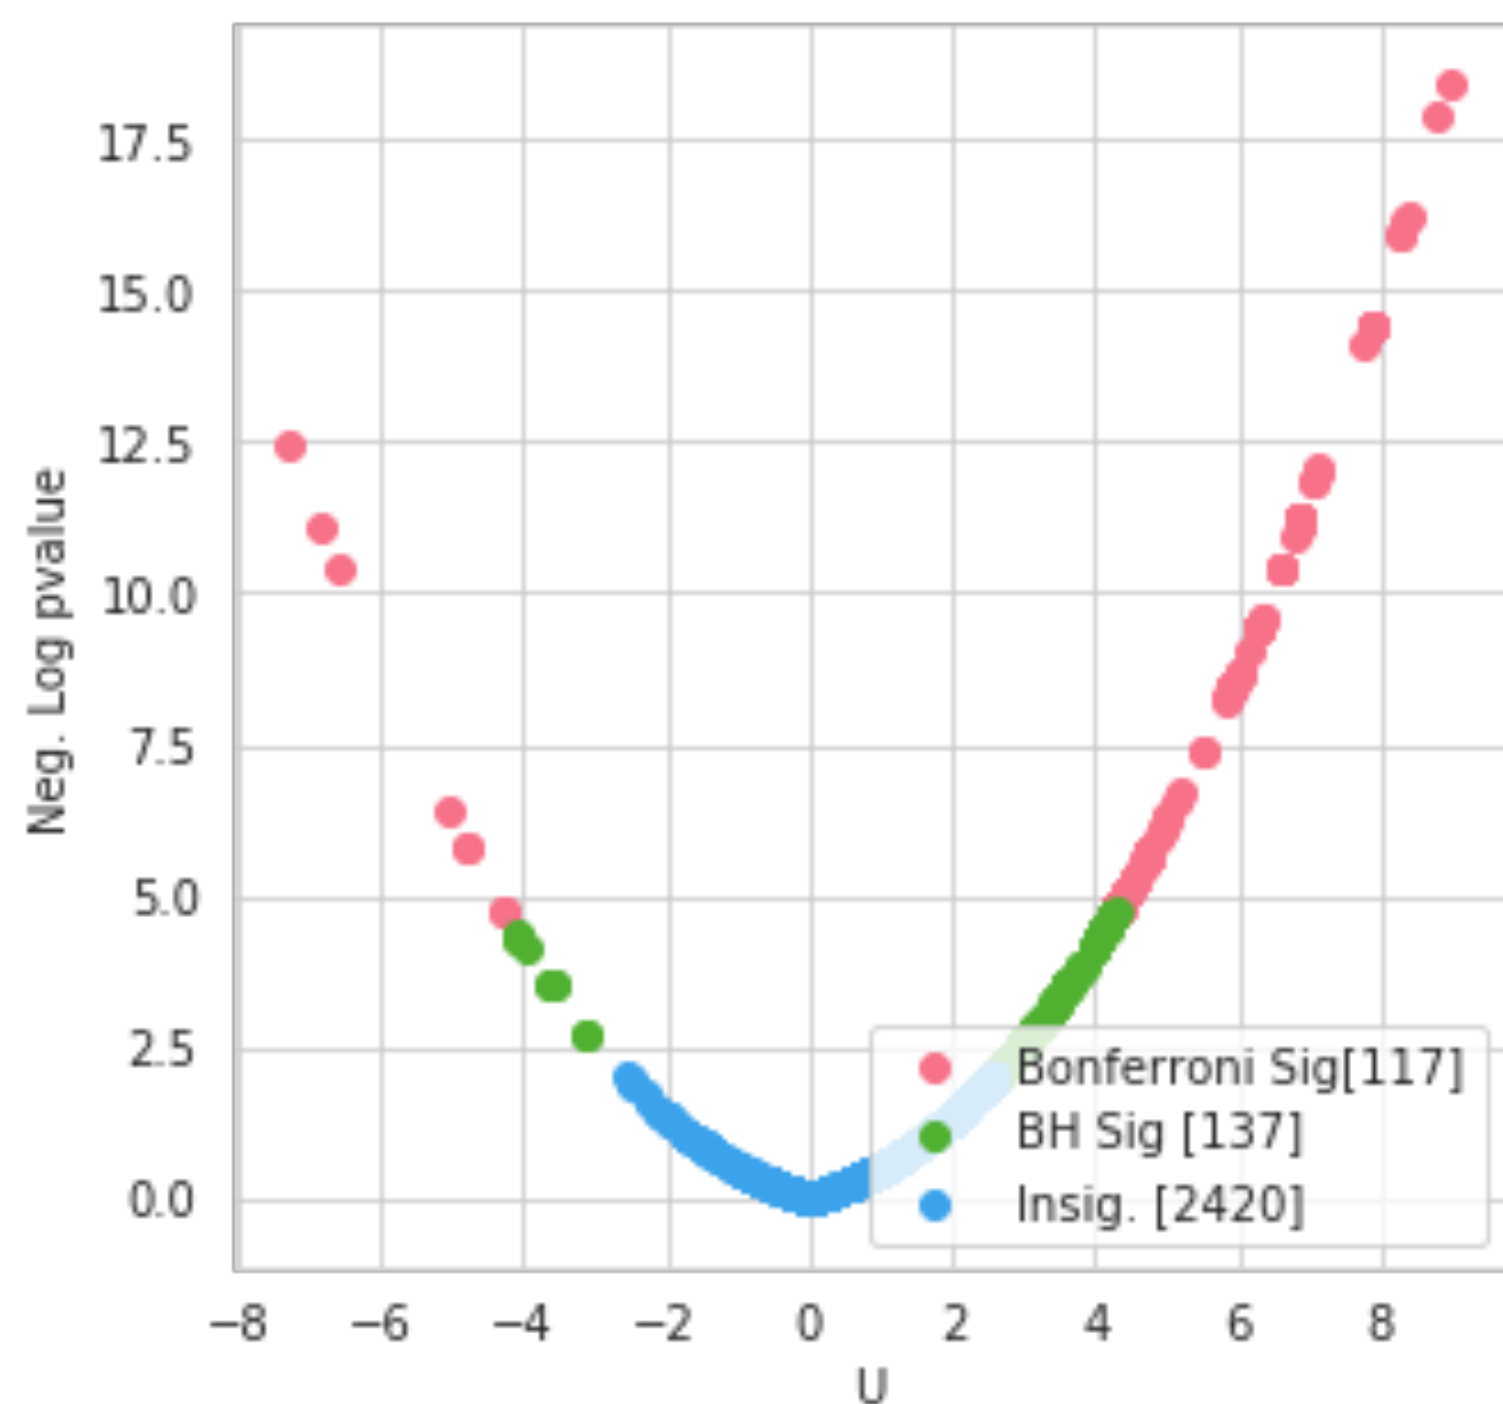

# Cluster 2 vs Normal

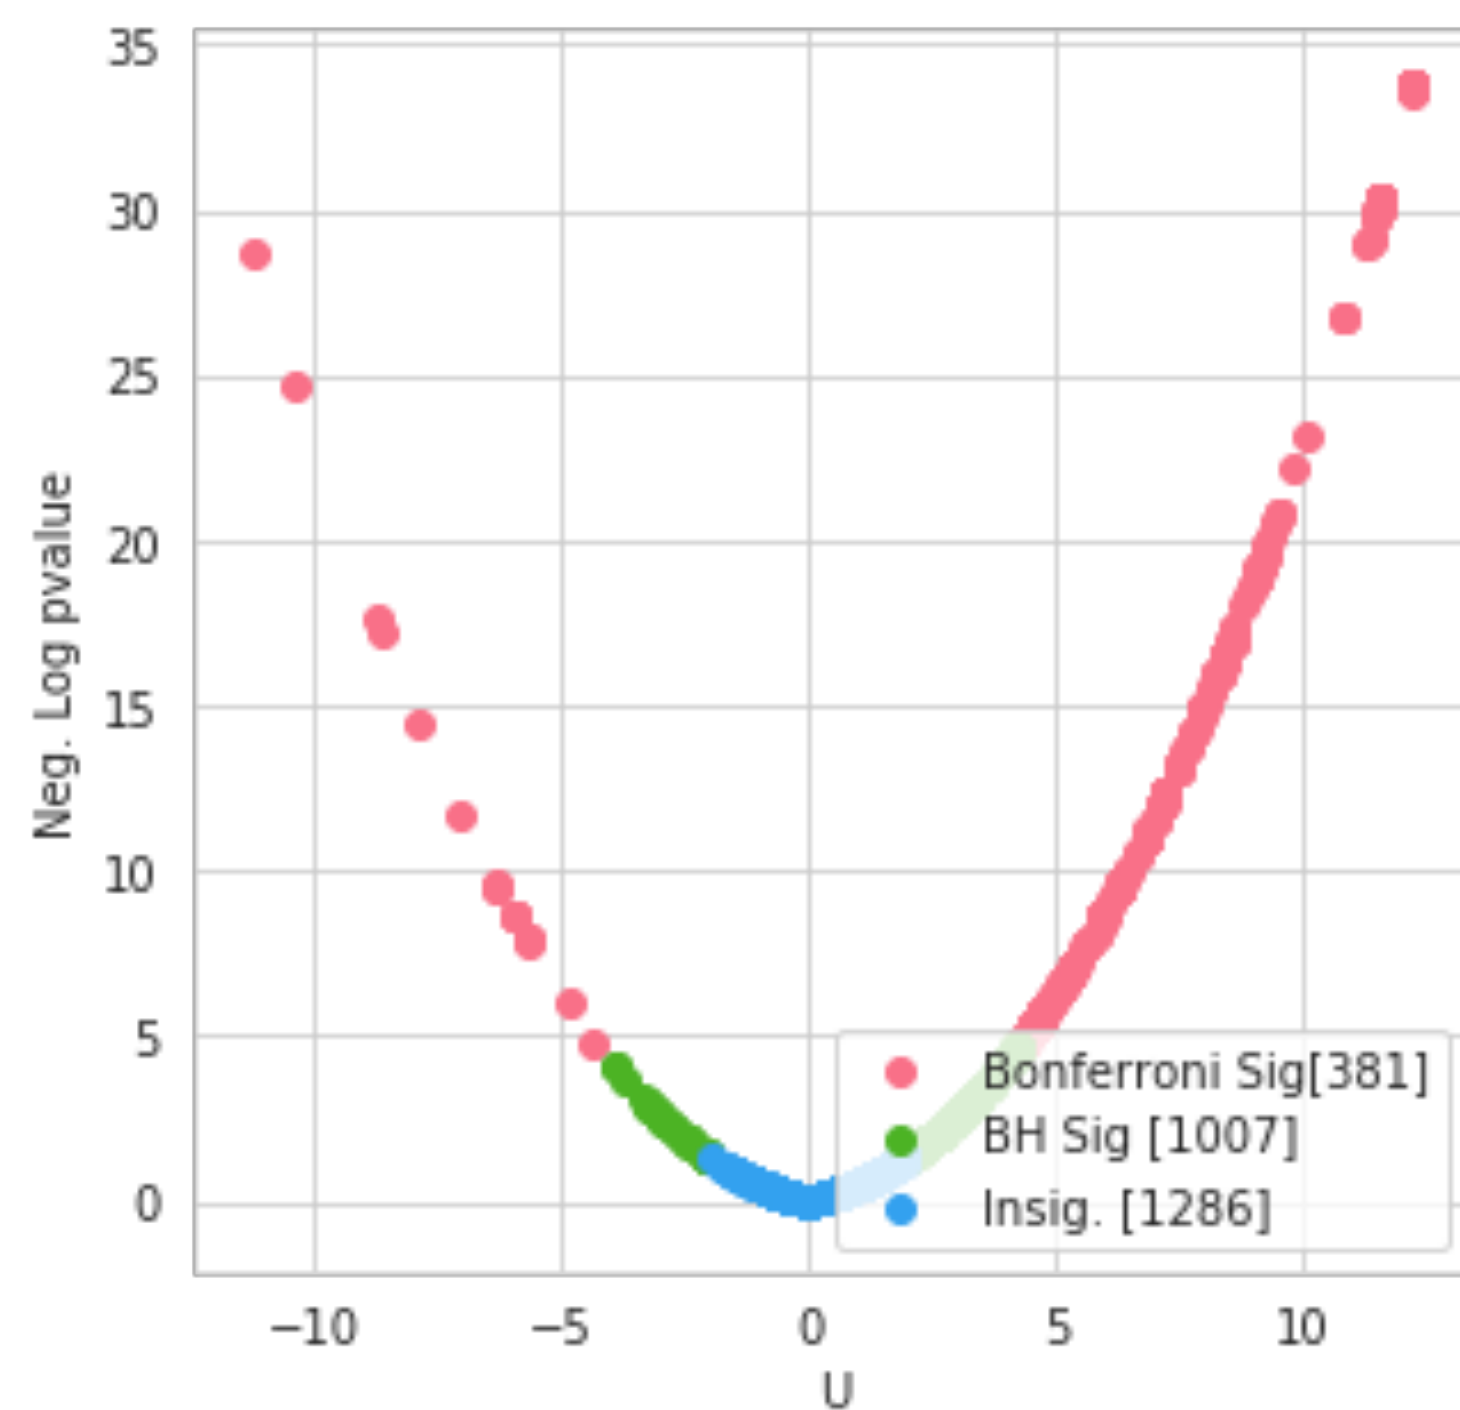

# Cluster 3 vs Normal

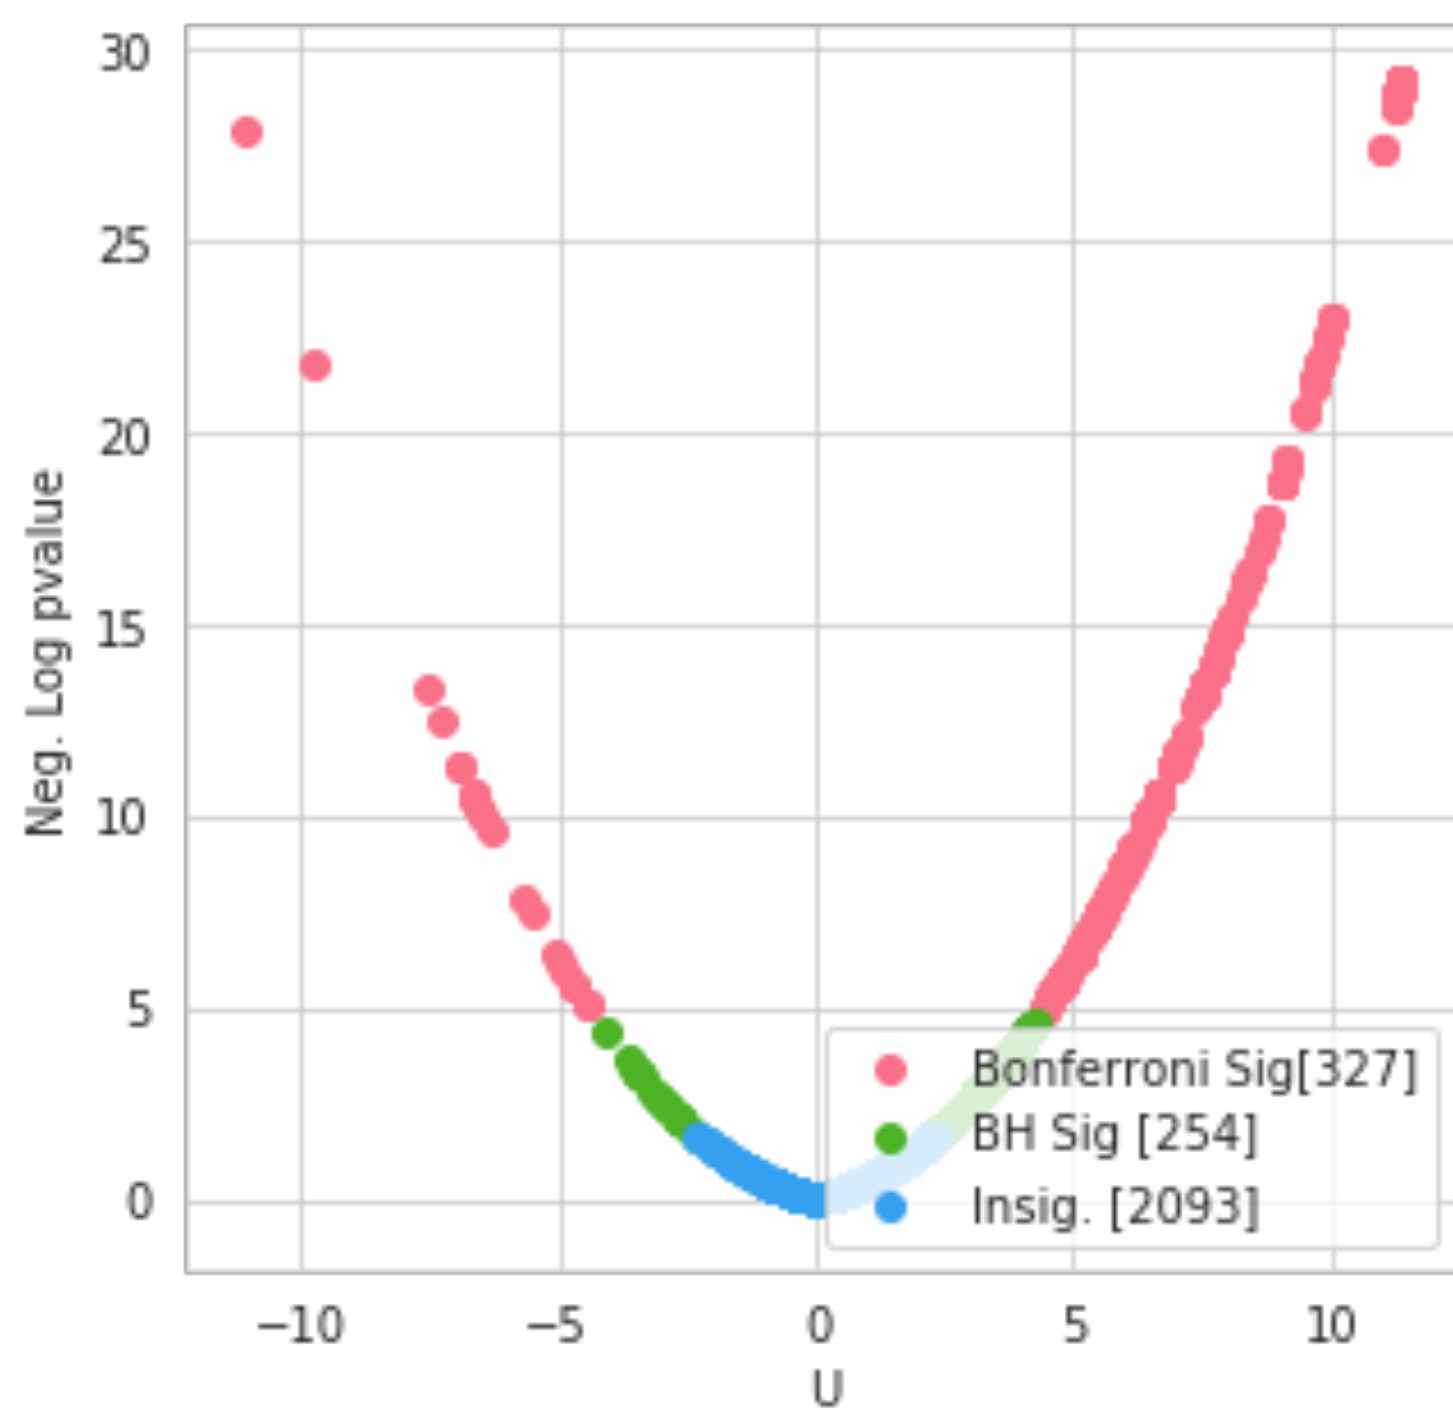

# Cluster 4 vs Normal

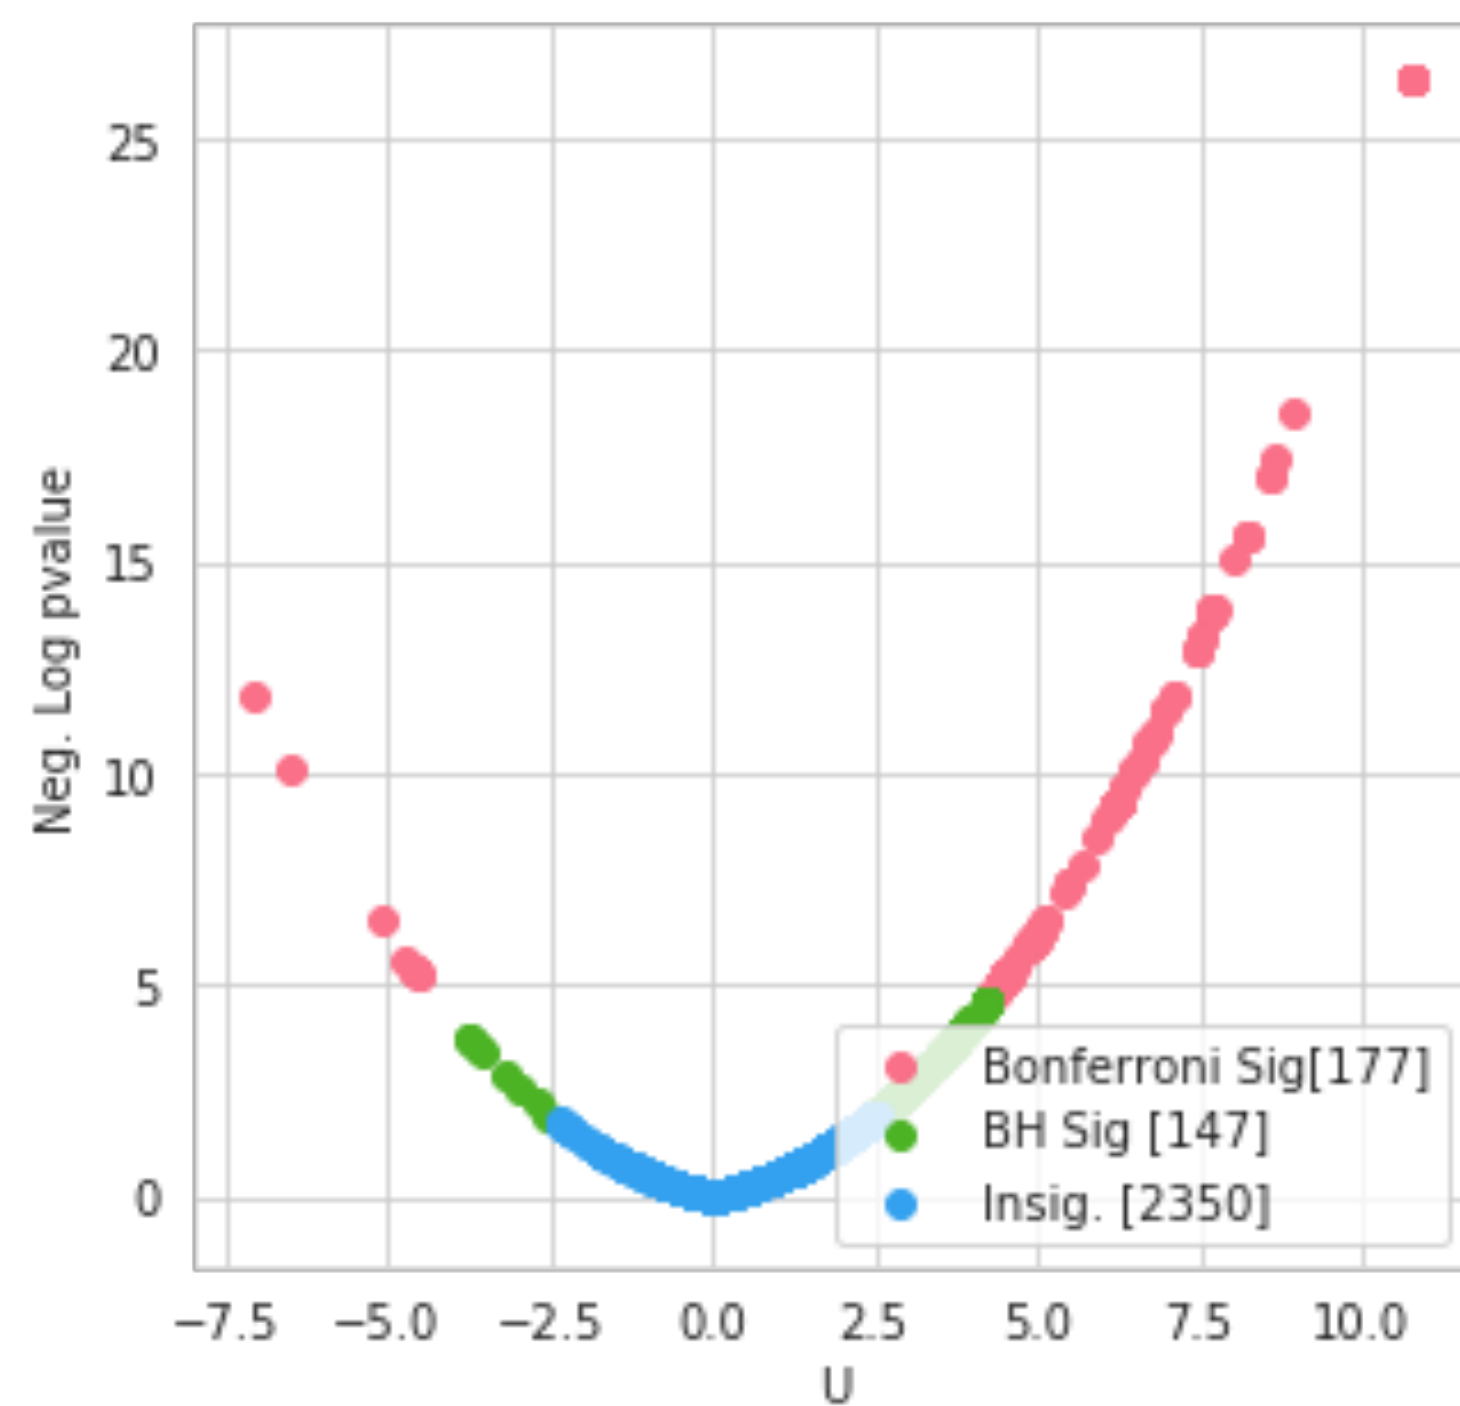

Supplement: Supplementary file 7 [file supplementary]
